# Supplementary material for: Silver-mediated thio-acetoxylation and TFA triggered cyclization of amino disulfides with unactivated alkenes: synthesis of 3-aryl/alkyl-1,4-benzothiazines
Source: Royal Society of Chemistry journal article supplement (doi:10.1039/c5ra12995h), 2015-01-01

## **Silver Mediated Thio-Acetoxylation and TFA Triggered Cyclization of Amino Disulfides with Unactivated Alkenes: Synthesis of 3-Aryl/Alkyl-1,4-benzothiazines**

Ch. Durga Prasad, Ajay Verma, Moh. Sattar, Sangit Kumar\*

Content

HRMS of synthesized compounds S2-S27

# HRMS spectra of compound 1a

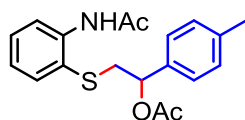

## Display Report

|                      |                                                         |                  |                      |
|----------------------|---------------------------------------------------------|------------------|----------------------|
| <b>Analysis Info</b> |                                                         | Acquisition Date | 9/15/2014 3:23:33 PM |
| Analysis Name        | D:\Data\user data\2014\SEPT\15 SEPT\Dr.S.Kumar-DP-513.d | Operator         | RUCHI                |
| Method               | tune_low.m                                              | Instrument       | micrOTOF-Q II 10330  |
| Sample Name          | DP-513                                                  |                  |                      |
| Comment              |                                                         |                  |                      |

### Acquisition Parameter

|             |            |                       |           |                  |           |
|-------------|------------|-----------------------|-----------|------------------|-----------|
| Source Type | ESI        | Ion Polarity          | Positive  | Set Nebulizer    | 0.4 Bar   |
| Focus       | Not active | Set Capillary         | 4600 V    | Set Dry Heater   | 180 °C    |
| Scan Begin  | 50 m/z     | Set End Plate Offset  | -500 V    | Set Dry Gas      | 4.0 l/min |
| Scan End    | 3000 m/z   | Set Collision Cell RF | 130.0 Vpp | Set Divert Valve | Waste     |

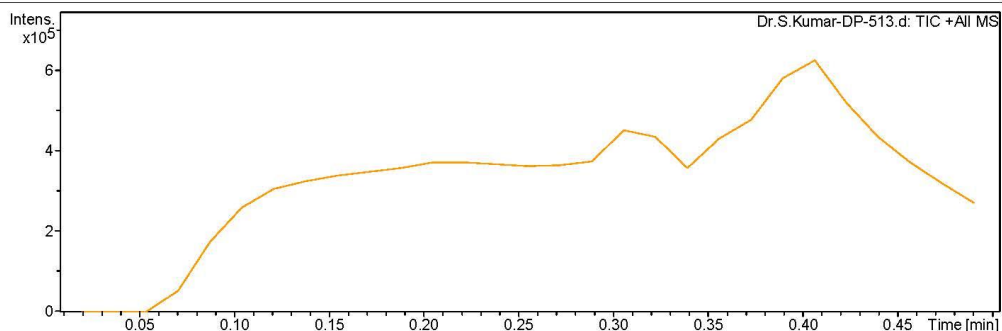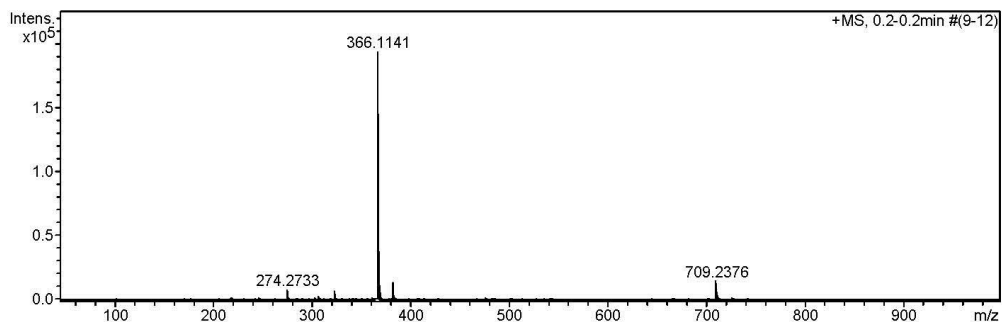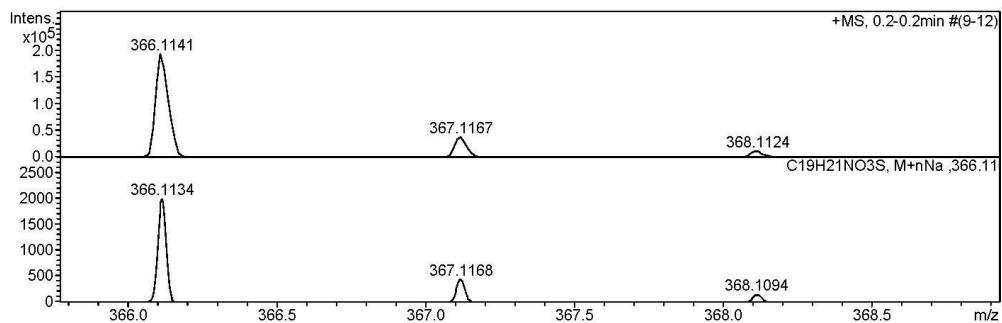

# HRMS spectra of compound **1b**

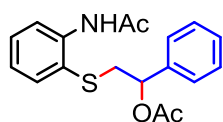

## Display Report

**Analysis Info**  
Analysis Name: D:\Data\user data\2014\NOVEMBER\17 NOV\Dr.S.Kumar-DP-535.d  
Method: tune\_low.m  
Sample Name: DP-535  
Comment:  
Acquisition Date: 11/17/2014 4:25:10 AM  
Operator: RUCHI  
Instrument: micrOTOF-Q II 10330

**Acquisition Parameter**  
Source Type: ESI  
Focus: Not active  
Scan Begin: 50 m/z  
Scan End: 3000 m/z  
Ion Polarity: Positive  
Set Capillary: 4600 V  
Set End Plate Offset: -500 V  
Set Collision Cell RF: 130.0 Vpp  
Set Nebulizer: 0.4 Bar  
Set Dry Heater: 180 °C  
Set Dry Gas: 4.0 l/min  
Set Divert Valve: Waste

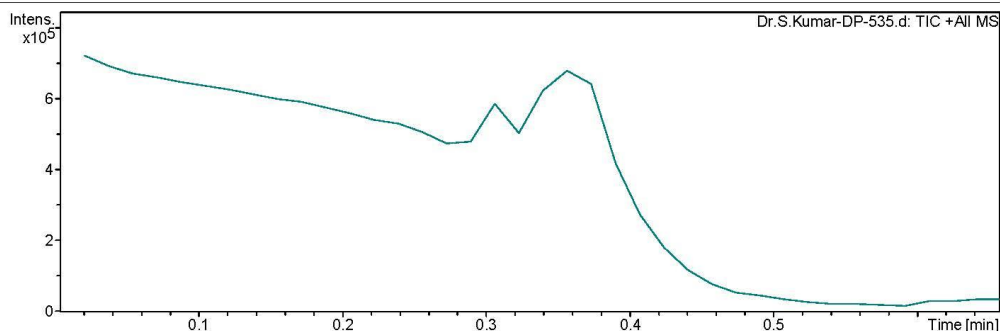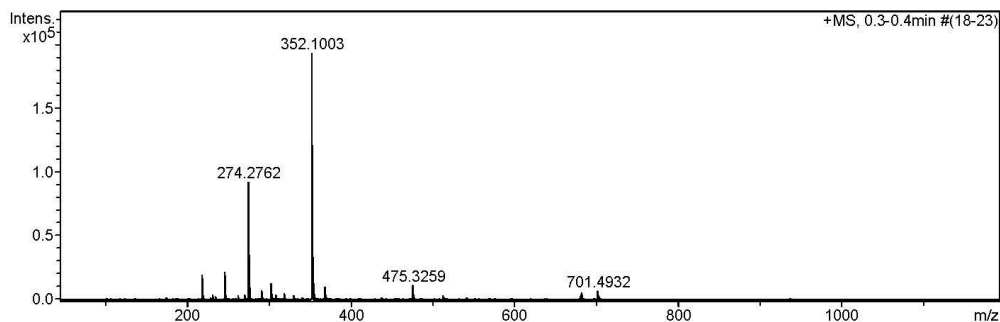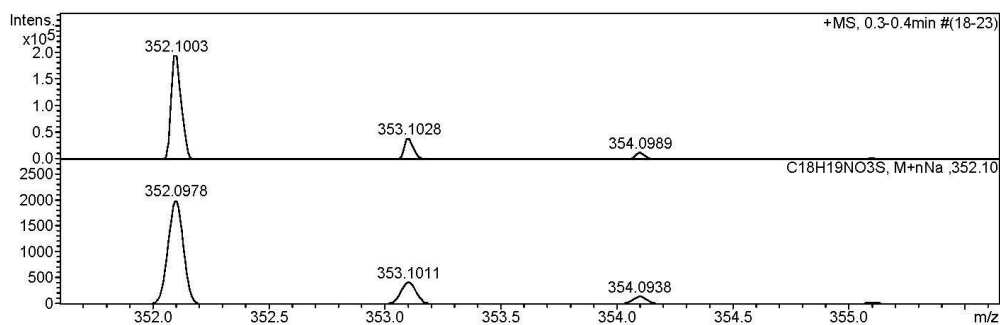

# HRMS spectra of compound 1c

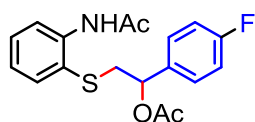

## Display Report

|                      |                                                            |                  |                       |
|----------------------|------------------------------------------------------------|------------------|-----------------------|
| <b>Analysis Info</b> |                                                            | Acquisition Date | 11/14/2014 5:15:29 PM |
| Analysis Name        | D:\Data\user data\2014\NOVEMBER\14 NOV\Dr.S.Kumar-DP-532.d | Operator         | RUCHI                 |
| Method               | tune_low.m                                                 | Instrument       | micrOTOF-Q II 10330   |
| Sample Name          | DP-532                                                     |                  |                       |
| Comment              |                                                            |                  |                       |

### Acquisition Parameter

|             |            |                       |           |                  |           |
|-------------|------------|-----------------------|-----------|------------------|-----------|
| Source Type | ESI        | Ion Polarity          | Positive  | Set Nebulizer    | 0.4 Bar   |
| Focus       | Not active | Set Capillary         | 4600 V    | Set Dry Heater   | 180 °C    |
| Scan Begin  | 50 m/z     | Set End Plate Offset  | -500 V    | Set Dry Gas      | 4.0 l/min |
| Scan End    | 3000 m/z   | Set Collision Cell RF | 130.0 Vpp | Set Divert Valve | Waste     |

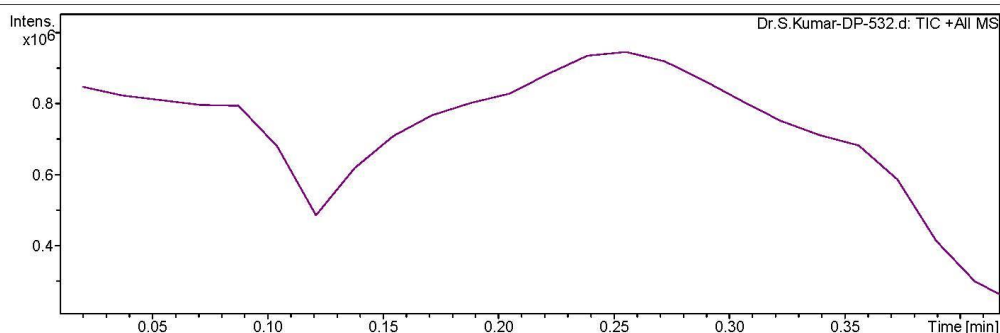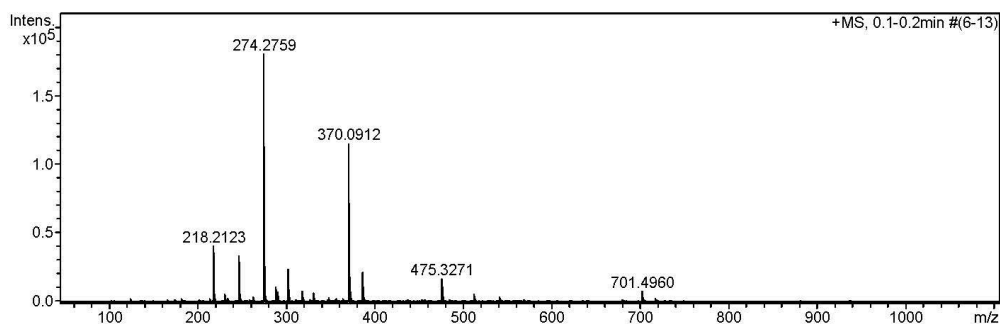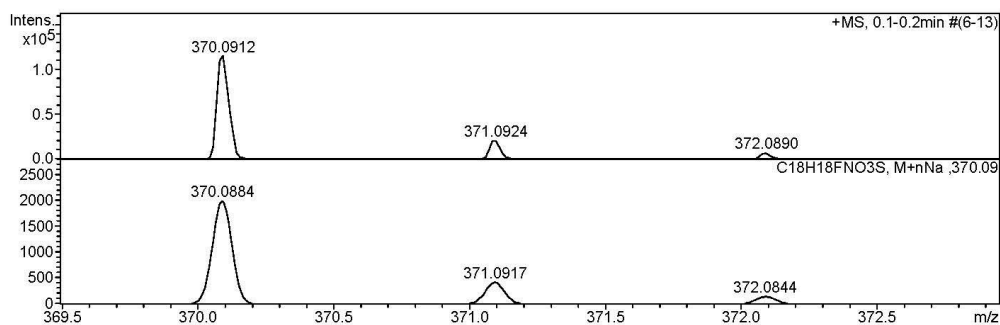

# HRMS spectra of compound **1d**

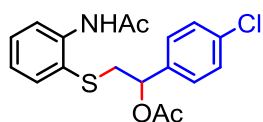

## Display Report

|                      |                                                                     |                  |                      |
|----------------------|---------------------------------------------------------------------|------------------|----------------------|
| <b>Analysis Info</b> |                                                                     | Acquisition Date | 9/12/2014 2:31:25 PM |
| Analysis Name        | D:\Data\user data\2014\SEPT\12 sept\Dr.S.Kumar-DP-515_1-A,6_01_60.d | Operator         | RUCHI                |
| Method               | HRLCMS-20 Sept.m                                                    | Instrument       | micrOTOF-Q II 10330  |
| Sample Name          | Dr.S.Kumar-DP-515                                                   |                  |                      |
| Comment              |                                                                     |                  |                      |

### Acquisition Parameter

|             |          |                       |           |                  |           |
|-------------|----------|-----------------------|-----------|------------------|-----------|
| Source Type | ESI      | Ion Polarity          | Positive  | Set Nebulizer    | 1.2 Bar   |
| Focus       | Active   | Set Capillary         | 4500 V    | Set Dry Heater   | 200 °C    |
| Scan Begin  | 50 m/z   | Set End Plate Offset  | -500 V    | Set Dry Gas      | 7.0 l/min |
| Scan End    | 3000 m/z | Set Collision Cell RF | 130.0 Vpp | Set Divert Valve | Waste     |

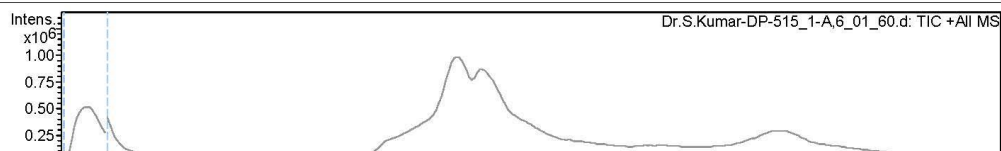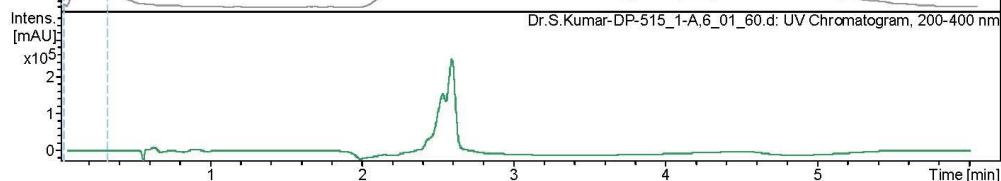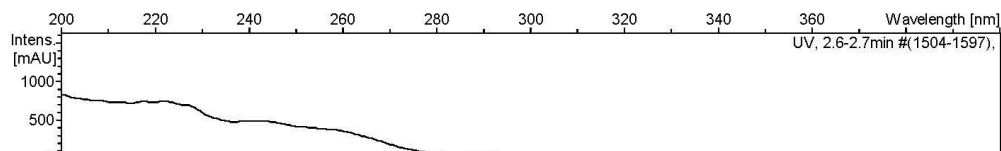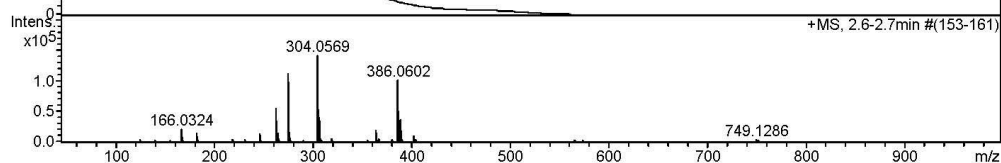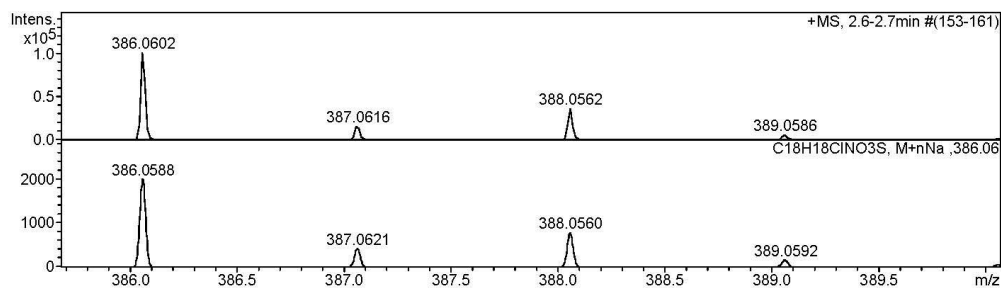

# HRMS spectra of compound **1e**

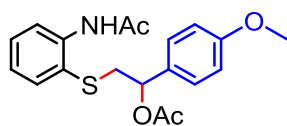

## Display Report

|                      |                                                            |                  |                       |
|----------------------|------------------------------------------------------------|------------------|-----------------------|
| <b>Analysis Info</b> |                                                            | Acquisition Date | 11/14/2014 5:17:40 PM |
| Analysis Name        | D:\Data\user data\2014\NOVEMBER\14 NOV\Dr.S.Kumar-DP-534.d | Operator         | RUCHI                 |
| Method               | tune_low.m                                                 | Instrument       | micrOTOF-Q II 10330   |
| Sample Name          | DP-534                                                     |                  |                       |
| Comment              |                                                            |                  |                       |

### Acquisition Parameter

|             |            |                       |           |                  |           |
|-------------|------------|-----------------------|-----------|------------------|-----------|
| Source Type | ESI        | Ion Polarity          | Positive  | Set Nebulizer    | 0.4 Bar   |
| Focus       | Not active | Set Capillary         | 4600 V    | Set Dry Heater   | 180 °C    |
| Scan Begin  | 50 m/z     | Set End Plate Offset  | -500 V    | Set Dry Gas      | 4.0 l/min |
| Scan End    | 3000 m/z   | Set Collision Cell RF | 130.0 Vpp | Set Divert Valve | Waste     |

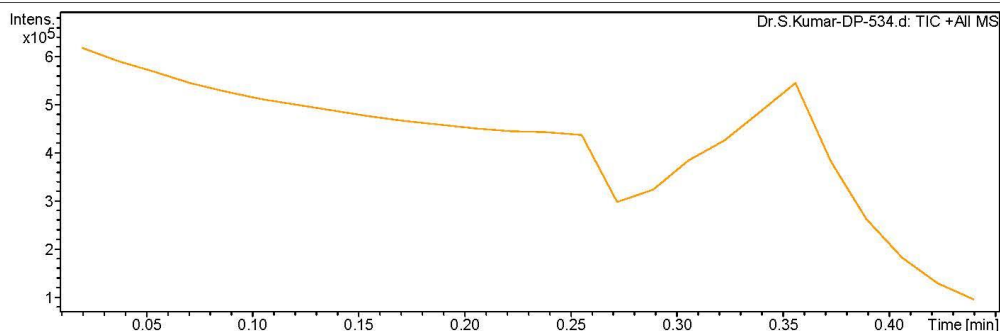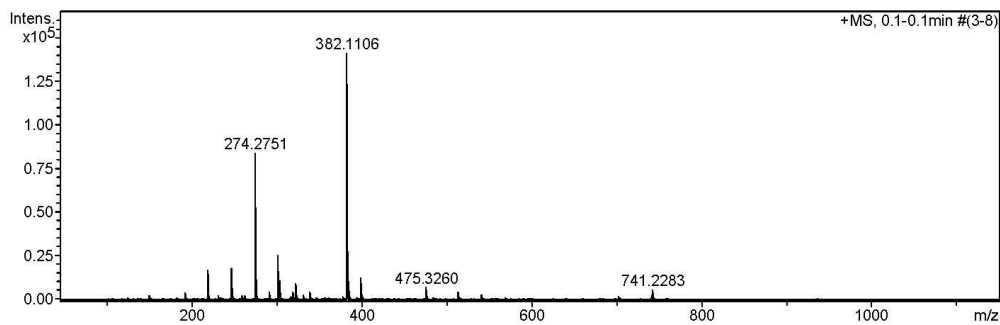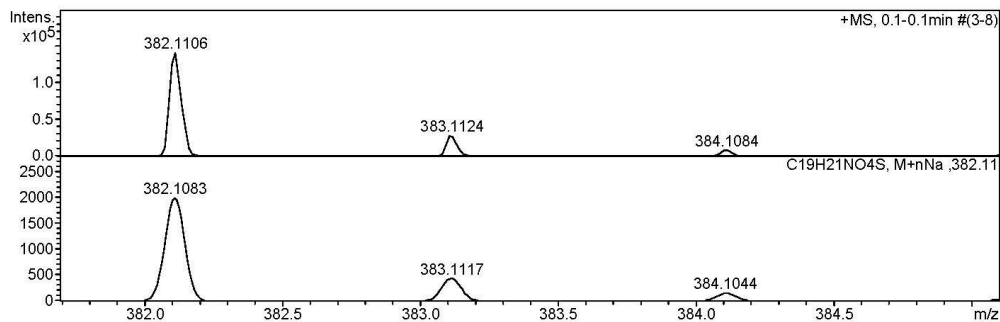

# HRMS spectra of compound **1f**

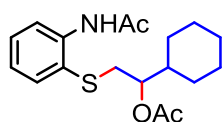

## Display Report

|                      |                                                                      |                  |                       |
|----------------------|----------------------------------------------------------------------|------------------|-----------------------|
| <b>Analysis Info</b> |                                                                      | Acquisition Date | 9/30/2014 12:08:00 PM |
| Analysis Name        | D:\Data\user data\2014\SEPT\30 SEPT\Dr.S.kumar-DP-533_1-C_2_01_279.d | Operator         | RUCHI                 |
| Method               | HRLCMS-20 Sept.m                                                     | Instrument       | micrOTOF-Q II 10330   |
| Sample Name          | Dr.S.kumar-DP-533                                                    |                  |                       |
| Comment              |                                                                      |                  |                       |

### Acquisition Parameter

|             |          |                       |           |                  |           |
|-------------|----------|-----------------------|-----------|------------------|-----------|
| Source Type | ESI      | Ion Polarity          | Positive  | Set Nebulizer    | 1.2 Bar   |
| Focus       | Active   | Set Capillary         | 4500 V    | Set Dry Heater   | 200 °C    |
| Scan Begin  | 50 m/z   | Set End Plate Offset  | -500 V    | Set Dry Gas      | 7.0 l/min |
| Scan End    | 3000 m/z | Set Collision Cell RF | 130.0 Vpp | Set Divert Valve | Waste     |

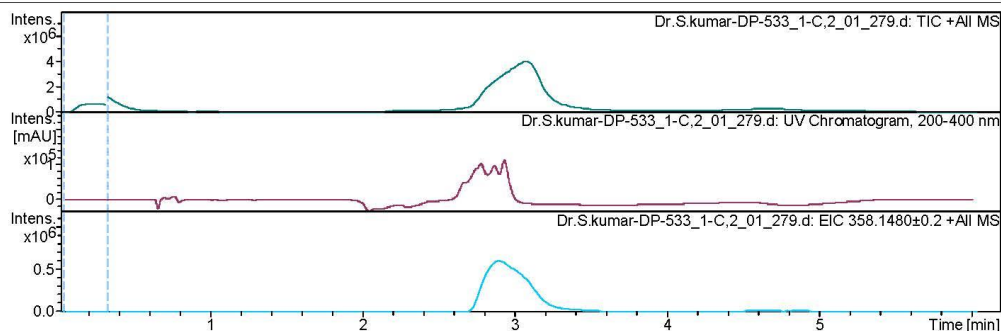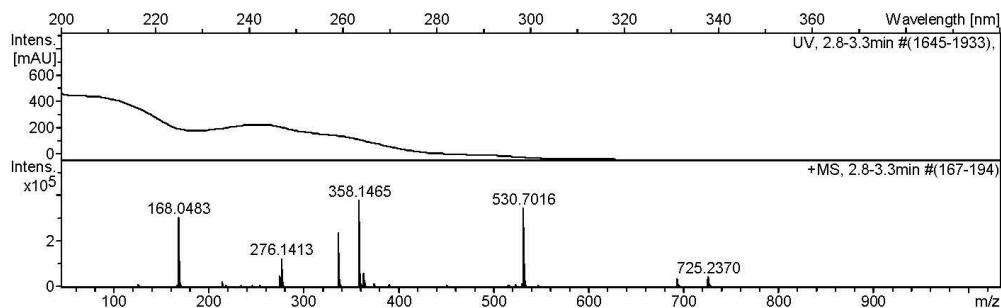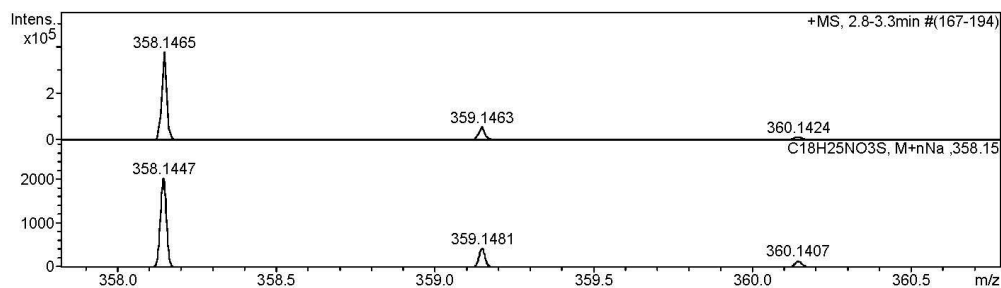

# HRMS spectra of compound **1g**

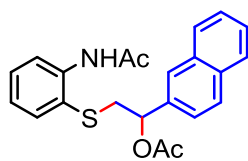

## Display Report

|                      |                                                         |                  |                      |
|----------------------|---------------------------------------------------------|------------------|----------------------|
| <b>Analysis Info</b> |                                                         | Acquisition Date | 9/16/2014 3:01:55 PM |
| Analysis Name        | D:\Data\user data\2014\SEPT\16 SEPT\Dr.S.Kumar-DP-523.d | Operator         | RUCHI                |
| Method               | tune_low.m                                              | Instrument       | micrOTOF-Q II 10330  |
| Sample Name          | DP-523                                                  |                  |                      |
| Comment              |                                                         |                  |                      |

### Acquisition Parameter

|             |            |                       |           |                  |           |
|-------------|------------|-----------------------|-----------|------------------|-----------|
| Source Type | ESI        | Ion Polarity          | Positive  | Set Nebulizer    | 0.4 Bar   |
| Focus       | Not active | Set Capillary         | 4600 V    | Set Dry Heater   | 180 °C    |
| Scan Begin  | 50 m/z     | Set End Plate Offset  | -500 V    | Set Dry Gas      | 4.0 l/min |
| Scan End    | 3000 m/z   | Set Collision Cell RF | 230.0 Vpp | Set Divert Valve | Waste     |

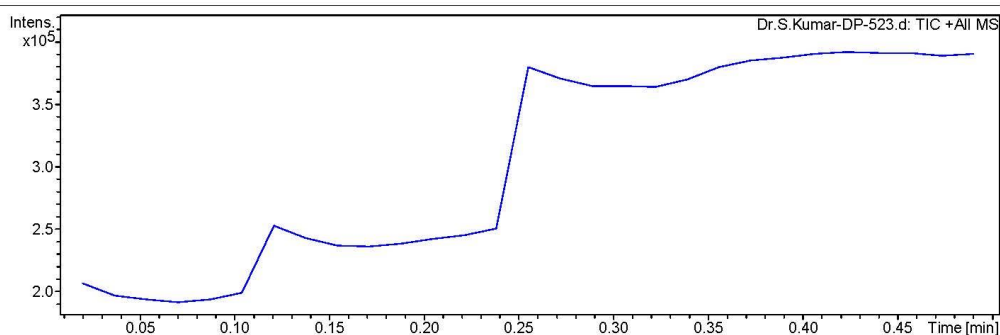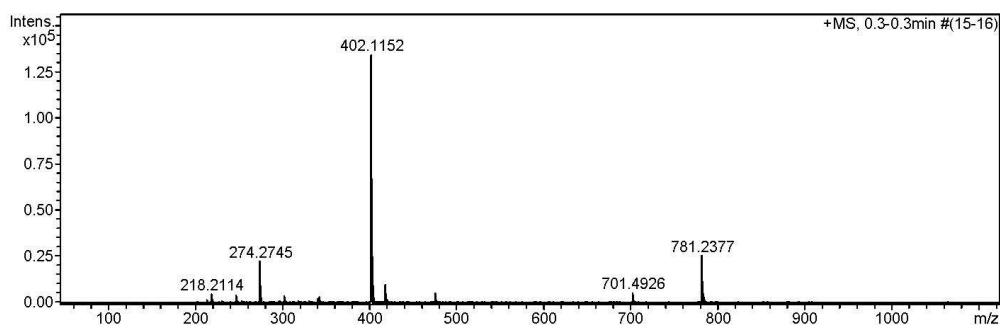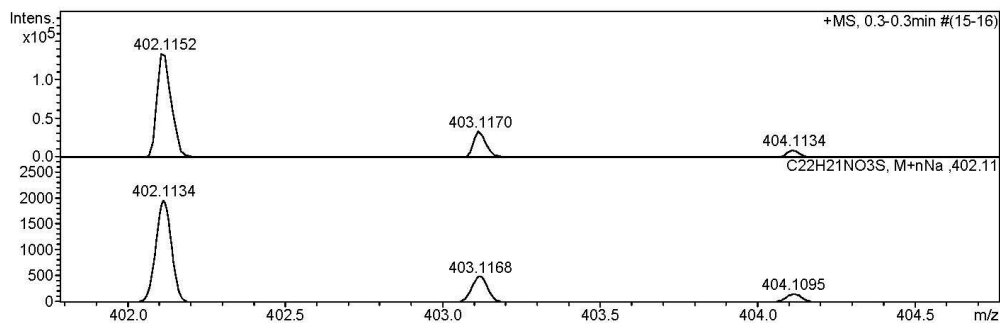



# HRMS spectra of compound 1h

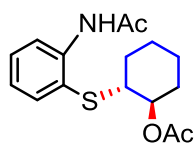

## Qualitative Compound Report

|                               |                            |                      |                                      |
|-------------------------------|----------------------------|----------------------|--------------------------------------|
| <b>Data File</b>              | DP-521.D                   | <b>Sample Name</b>   | DP-521                               |
| <b>Sample Type</b>            |                            | <b>Position</b>      | 2                                    |
| <b>Instrument Name</b>        | GCQTOF                     | <b>User Name</b>     | Agilent-PC\admin                     |
| <b>Acq Method</b>             | IISER_GENERAL_HP5_80_V30.M | <b>Acquired Time</b> | 11-Jun-15 2:07:43 PM                 |
| <b>IRM Calibration Status</b> | Success                    | <b>DA Method</b>     | iSER13MAY 2013.m                     |
| <b>Comment</b>                |                            |                      |                                      |
| <b>Expected Barcode</b>       | <b>Sample Amount</b>       |                      |                                      |
| <b>Dual Inj Vol</b>           | 0.1                        | <b>TuneName</b>      | Install_tune.ei.tune_1_4_13.tune.xml |
| <b>TunePath</b>               | D:\MassHunter\GCMS\1\7200  | <b>TuneDateStamp</b> | 41954.1706                           |
| <b>MSFirmwareVersion</b>      | G.7200.01.09               | <b>OperatorName</b>  | Agilent-PC\admin                     |
| <b>RunCompletedFlag</b>       | TRUE                       |                      |                                      |

### Compound Table

| Compound Label        | RT    | Mass     | Abund | Formula        | Tgt Mass | Diff (ppm) | MFG Formula    | DB Formula     |
|-----------------------|-------|----------|-------|----------------|----------|------------|----------------|----------------|
| Cpd 1: C16 H21 N O3 S | 7.491 | 307.1291 | 8028  | C16 H21 N O3 S | 307.1242 | 15.85      | C16 H21 N O3 S | C16 H21 N O3 S |

| Compound Label        | m/z      | RT    | Algorithm       | Mass     |
|-----------------------|----------|-------|-----------------|----------|
| Cpd 1: C16 H21 N O3 S | 307.1289 | 7.491 | Find By Formula | 307.1291 |

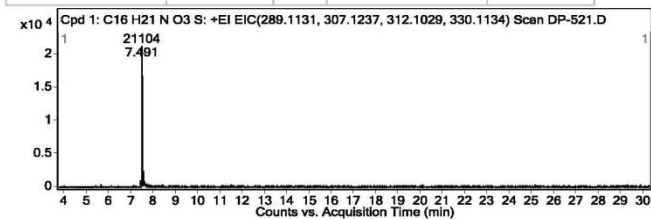

### MS Spectrum

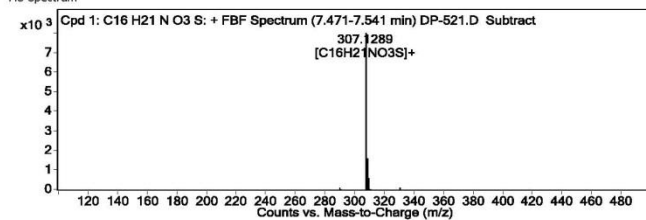

### MS Zoomed Spectrum

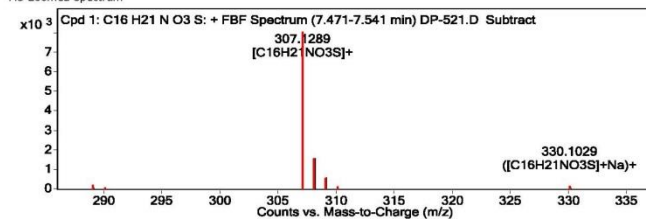

### MS Spectrum Peak List

| m/z      | z | Abund  | Formula    | Ion      |
|----------|---|--------|------------|----------|
| 289.1129 | 1 | 130.38 | C16H21NO3S | M+[-H2O] |
| 290.112  | 1 | 43     | C16H21NO3S | M+[-H2O] |

# HRMS spectra of compound **1i**

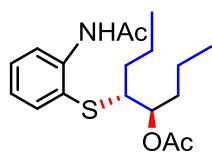

## Display Report

|                      |                                                            |                  |                       |
|----------------------|------------------------------------------------------------|------------------|-----------------------|
| <b>Analysis Info</b> |                                                            | Acquisition Date | 11/17/2014 4:27:47 AM |
| Analysis Name        | D:\Data\user data\2014\NOVEMBER\17 NOV\Dr.S.Kumar-DP-536.d | Operator         | RUCHI                 |
| Method               | tune_low.m                                                 | Instrument       | micrOTOF-Q II 10330   |
| Sample Name          | DP-536                                                     |                  |                       |
| Comment              |                                                            |                  |                       |

### Acquisition Parameter

|             |            |                       |           |                  |           |
|-------------|------------|-----------------------|-----------|------------------|-----------|
| Source Type | ESI        | Ion Polarity          | Positive  | Set Nebulizer    | 0.4 Bar   |
| Focus       | Not active | Set Capillary         | 4600 V    | Set Dry Heater   | 180 °C    |
| Scan Begin  | 50 m/z     | Set End Plate Offset  | -500 V    | Set Dry Gas      | 4.0 l/min |
| Scan End    | 3000 m/z   | Set Collision Cell RF | 130.0 Vpp | Set Divert Valve | Waste     |

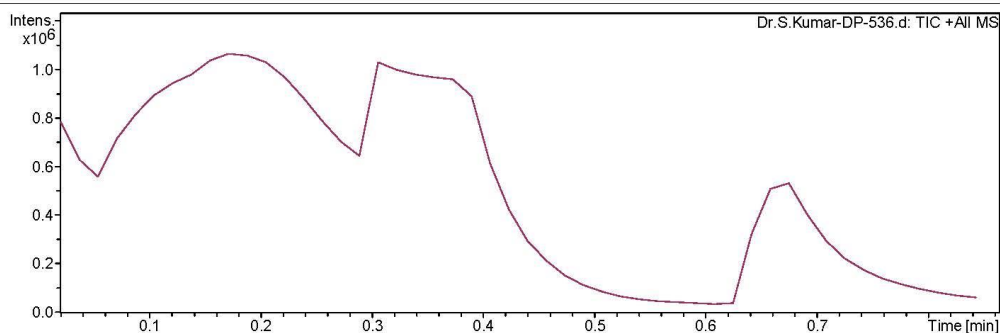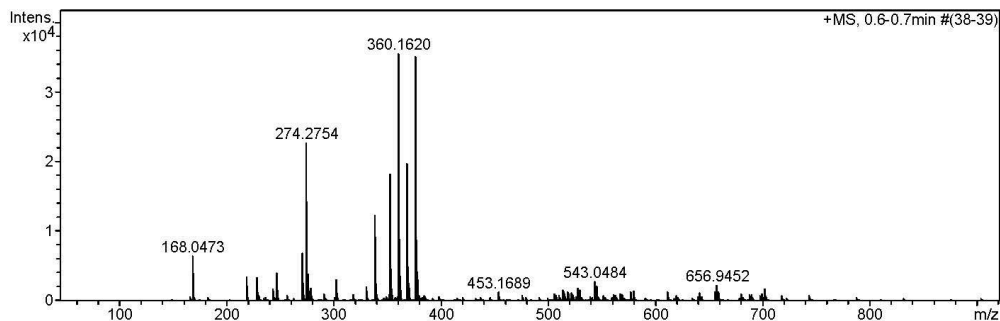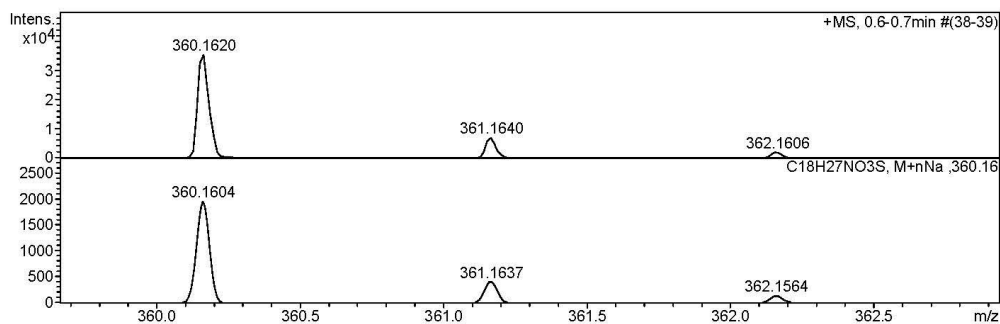

# HRMS spectra of compound 1j

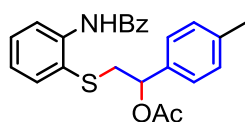

## Display Report

|                      |                                                            |                  |                       |
|----------------------|------------------------------------------------------------|------------------|-----------------------|
| <b>Analysis Info</b> |                                                            | Acquisition Date | 11/17/2014 4:30:38 AM |
| Analysis Name        | D:\Data\user data\2014\NOVEMBER\17 NOV\Dr.S.Kumar-DP-540.d | Operator         | RUCHI                 |
| Method               | tune_low.m                                                 | Instrument       | micrOTOF-Q II 10330   |
| Sample Name          | DP-540                                                     |                  |                       |
| Comment              |                                                            |                  |                       |

### Acquisition Parameter

|             |            |                       |           |                  |           |
|-------------|------------|-----------------------|-----------|------------------|-----------|
| Source Type | ESI        | Ion Polarity          | Positive  | Set Nebulizer    | 0.4 Bar   |
| Focus       | Not active | Set Capillary         | 4600 V    | Set Dry Heater   | 180 °C    |
| Scan Begin  | 50 m/z     | Set End Plate Offset  | -500 V    | Set Dry Gas      | 4.0 l/min |
| Scan End    | 3000 m/z   | Set Collision Cell RF | 230.0 Vpp | Set Divert Valve | Waste     |

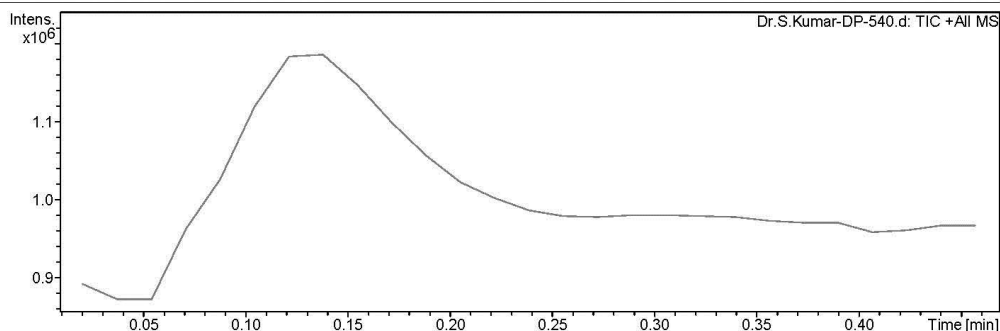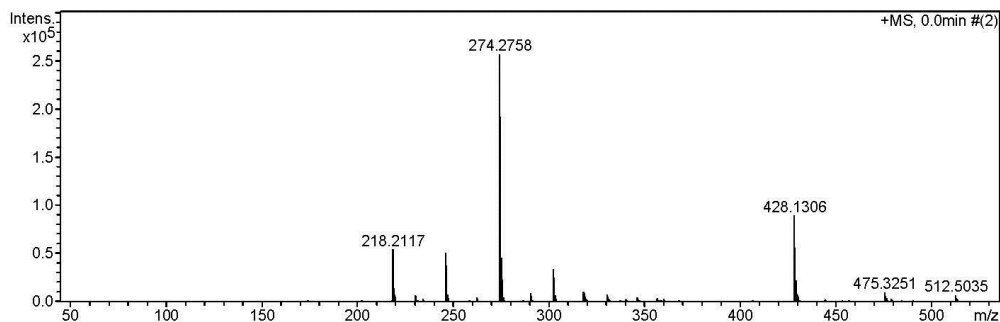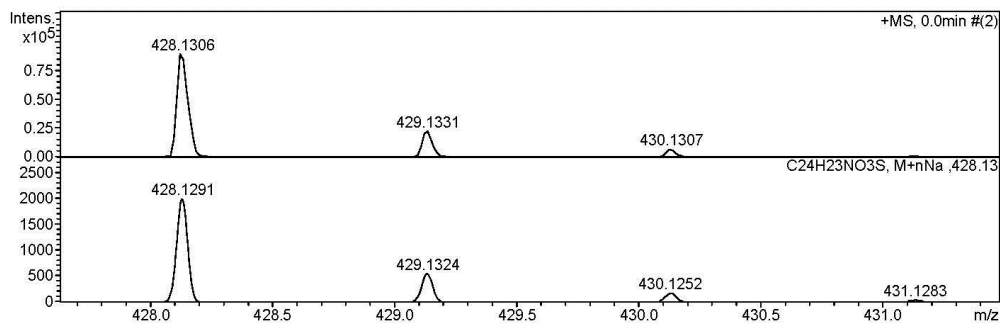

# HRMS spectra of compound **1k**

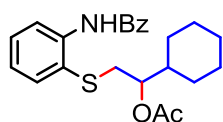

## Display Report

|                      |                                                                                 |                  |                      |
|----------------------|---------------------------------------------------------------------------------|------------------|----------------------|
| <b>Analysis Info</b> |                                                                                 | Acquisition Date | 6/10/2015 2:49:30 PM |
| Analysis Name        | D:\Data\user data\2015\JUNE-2015\10-JUNE-2015\Dr.S.Kumar-DP-549_1-A,5_01_2744.d | Operator         | RUCHI                |
| Method               | HRLCMS-20 Sept.m                                                                | Instrument       | microTOF-Q II 10330  |
| Sample Name          | Dr.S.Kumar-DP-549                                                               |                  |                      |
| Comment              |                                                                                 |                  |                      |

### Acquisition Parameter

|             |          |                       |           |                  |           |
|-------------|----------|-----------------------|-----------|------------------|-----------|
| Source Type | ESI      | Ion Polarity          | Positive  | Set Nebulizer    | 1.2 Bar   |
| Focus       | Active   | Set Capillary         | 4500 V    | Set Dry Heater   | 200 °C    |
| Scan Begin  | 50 m/z   | Set End Plate Offset  | -500 V    | Set Dry Gas      | 7.0 l/min |
| Scan End    | 3000 m/z | Set Collision Cell RF | 130.0 Vpp | Set Divert Valve | Waste     |

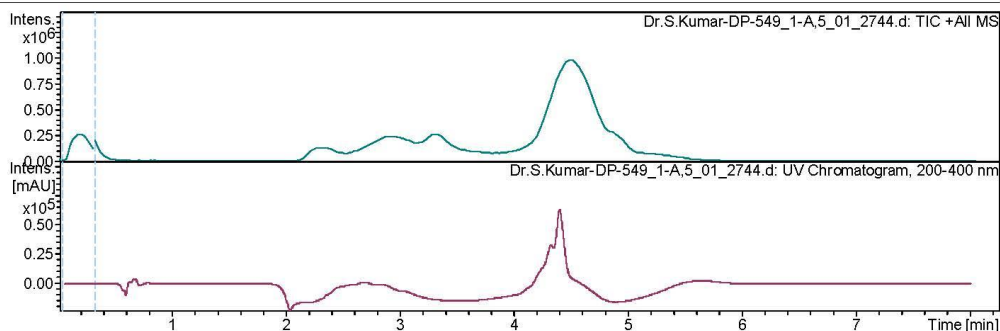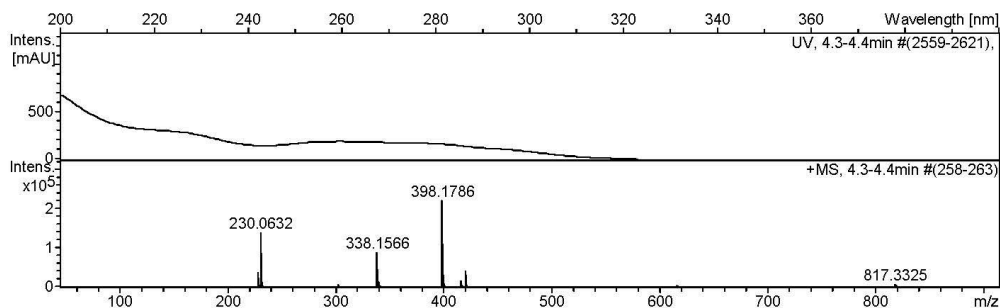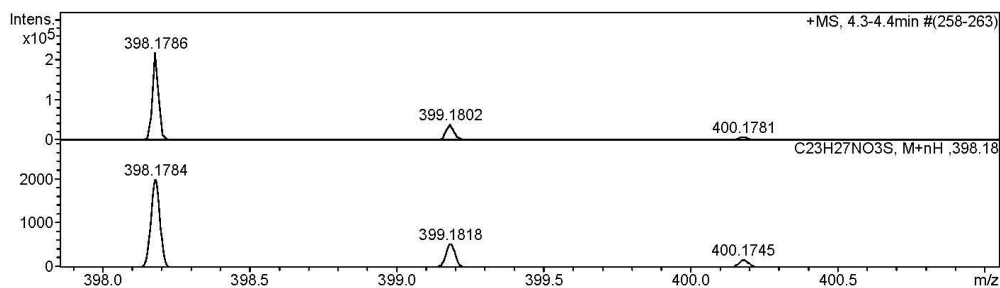

# HRMS spectra of compound **1m**

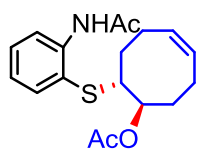

## Display Report

| Analysis Info |                                                                      | Acquisition Date     |                     |
|---------------|----------------------------------------------------------------------|----------------------|---------------------|
| Analysis Name | D:\Data\user data\2014\SEPT\22 SEPT\Dr.S.Kumar-DP-525_1-A,5_01_180.d | 9/22/2014 1:18:09 PM |                     |
| Method        | HRLCMS-20 Sept.m                                                     | Operator             | RUCHI               |
| Sample Name   | Dr.S.Kumar-DP-525                                                    | Instrument           | micrOTOF-Q II 10330 |
| Comment       |                                                                      |                      |                     |

### Acquisition Parameter

|             |          |                       |           |                  |           |
|-------------|----------|-----------------------|-----------|------------------|-----------|
| Source Type | ESI      | Ion Polarity          | Positive  | Set Nebulizer    | 1.2 Bar   |
| Focus       | Active   | Set Capillary         | 4500 V    | Set Dry Heater   | 200 °C    |
| Scan Begin  | 50 m/z   | Set End Plate Offset  | -500 V    | Set Dry Gas      | 7.0 l/min |
| Scan End    | 3000 m/z | Set Collision Cell RF | 130.0 Vpp | Set Divert Valve | Waste     |

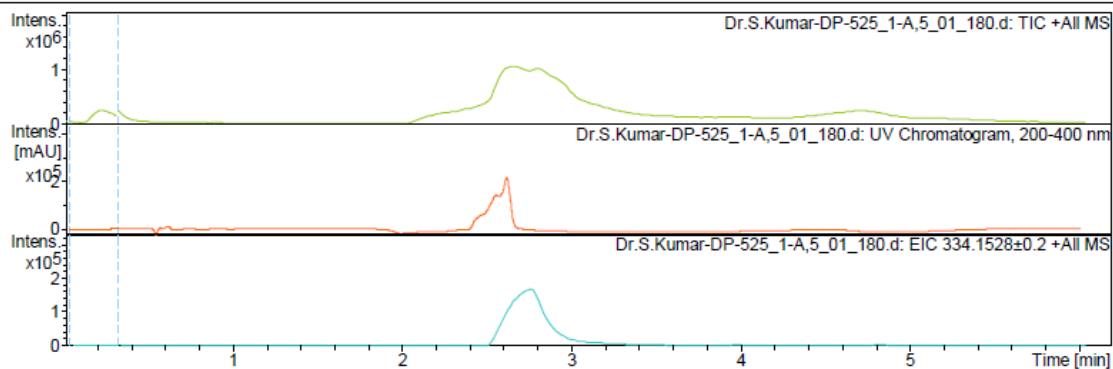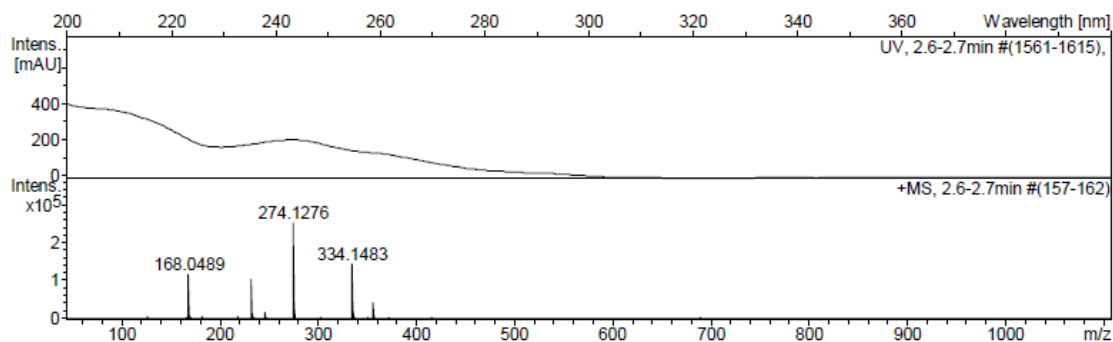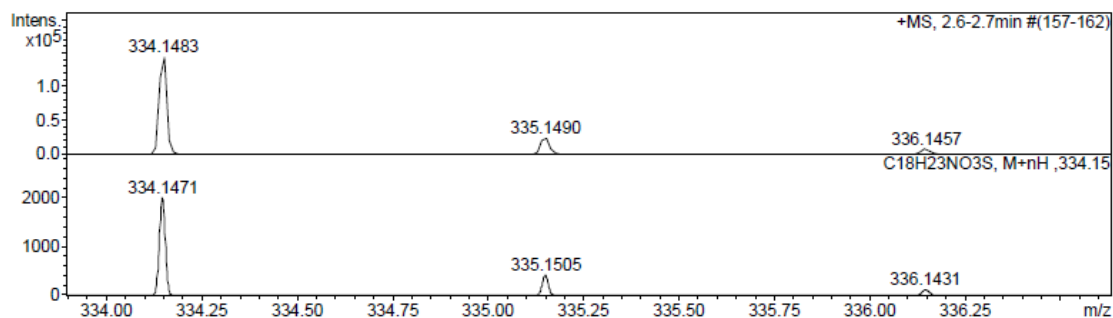

# HRMS spectra of compound 2a

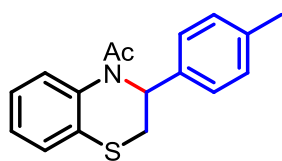

## Display Report

|                      |                                                                         |                                |
|----------------------|-------------------------------------------------------------------------|--------------------------------|
| <b>Analysis Info</b> | Acquisition Date                                                        | 11/18/2014 11:52:43 PM         |
| Analysis Name        | D:\Data\user data\2014\NOVEMBER\19 NOV\Dr.S.Kumar-DP-548_1-A,4_01_805.d |                                |
| Method               | HRLCMS-20 Sept.m                                                        | Operator RUCHI                 |
| Sample Name          | Dr.S.Kumar-DP-548                                                       | Instrument micrOTOF-Q II 10330 |
| Comment              |                                                                         |                                |

### Acquisition Parameter

|             |          |                       |           |                  |           |
|-------------|----------|-----------------------|-----------|------------------|-----------|
| Source Type | ESI      | Ion Polarity          | Positive  | Set Nebulizer    | 1.2 Bar   |
| Focus       | Active   | Set Capillary         | 4500 V    | Set Dry Heater   | 200 °C    |
| Scan Begin  | 50 m/z   | Set End Plate Offset  | -500 V    | Set Dry Gas      | 7.0 l/min |
| Scan End    | 3000 m/z | Set Collision Cell RF | 130.0 Vpp | Set Divert Valve | Waste     |

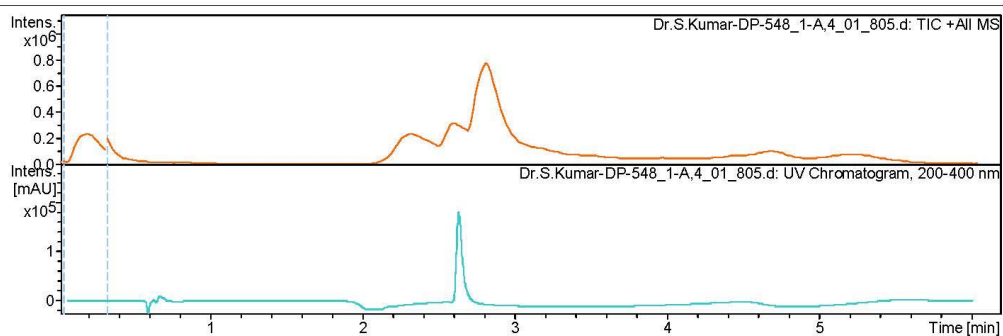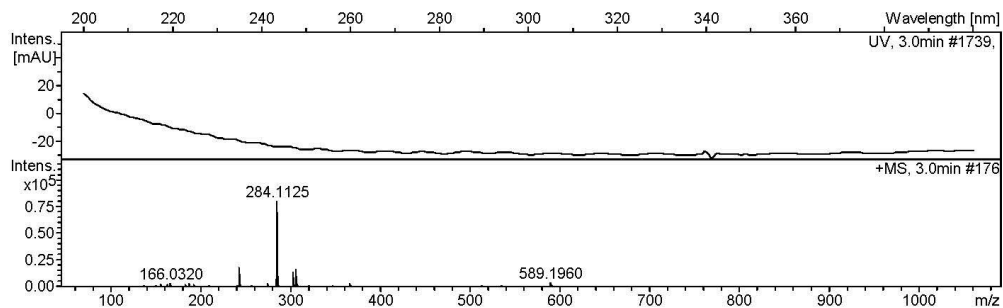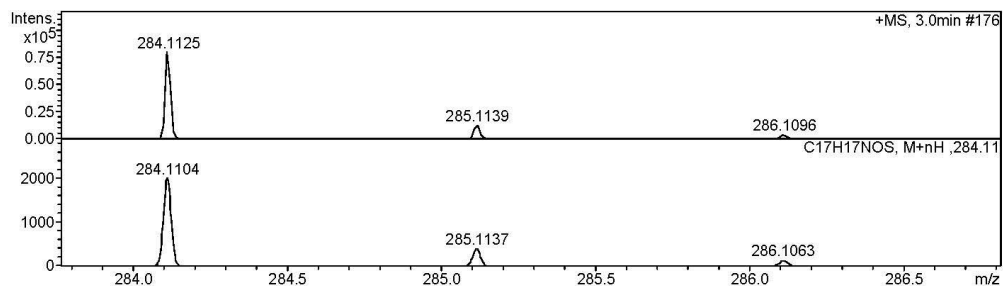

# HRMS spectra of compound **2b**

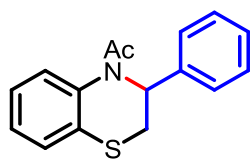

## Display Report

|                      |                                                                     |                  |                      |
|----------------------|---------------------------------------------------------------------|------------------|----------------------|
| <b>Analysis Info</b> |                                                                     | Acquisition Date | 6/4/2015 10:39:53 AM |
| Analysis Name        | D:\Data\user data\2015\JUNE-2015\04-june-2015\Dr.S.Kumar-DP-535-E.d | Operator         | RUCHI                |
| Method               | tune_low.m                                                          | Instrument       | micrOTOF-Q II 10330  |
| Sample Name          | DP-535-E                                                            |                  |                      |
| Comment              |                                                                     |                  |                      |

### Acquisition Parameter

|             |            |                       |           |                  |           |
|-------------|------------|-----------------------|-----------|------------------|-----------|
| Source Type | ESI        | Ion Polarity          | Positive  | Set Nebulizer    | 0.4 Bar   |
| Focus       | Not active | Set Capillary         | 4600 V    | Set Dry Heater   | 180 °C    |
| Scan Begin  | 50 m/z     | Set End Plate Offset  | -500 V    | Set Dry Gas      | 4.0 l/min |
| Scan End    | 3000 m/z   | Set Collision Cell RF | 130.0 Vpp | Set Divert Valve | Source    |

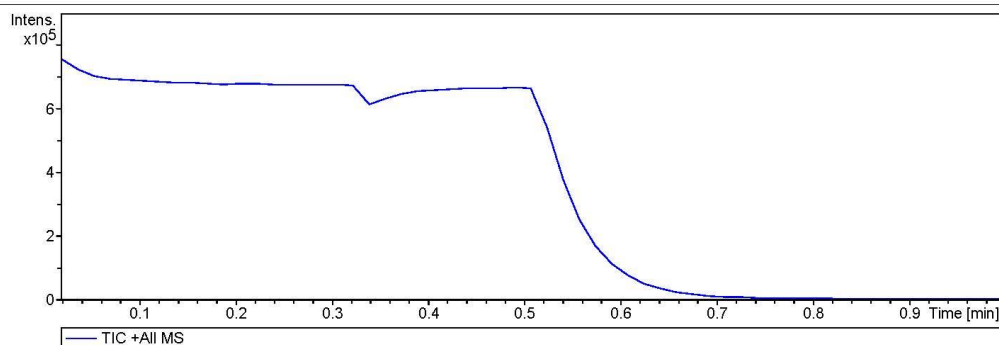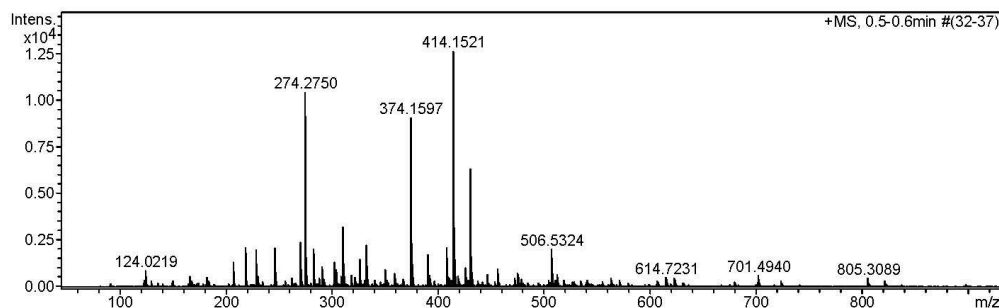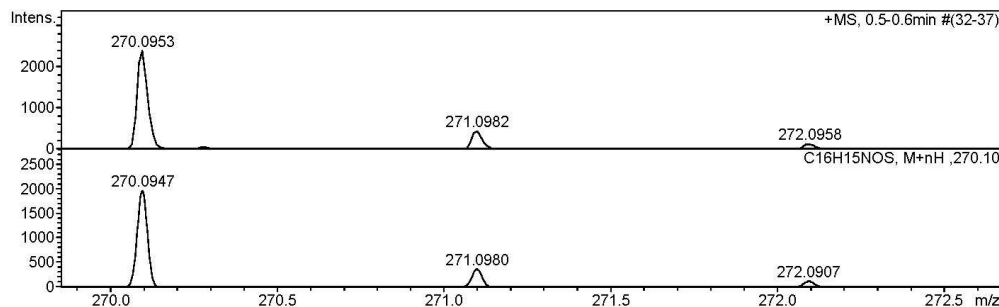

# HRMS spectra of compound 2c

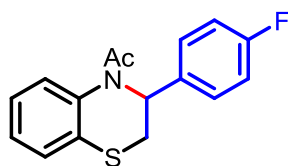

## Display Report

|                      |                                                                     |                  |                      |
|----------------------|---------------------------------------------------------------------|------------------|----------------------|
| <b>Analysis Info</b> |                                                                     | Acquisition Date | 4/24/2015 4:46:02 PM |
| Analysis Name        | D:\Data\user data\2015\April-2015\24-April-2015\Dr.S.Kumar-DP-580.d | Operator         | RUCHI                |
| Method               | tune_low.m                                                          | Instrument       | micrOTOF-Q II 10330  |
| Sample Name          | DP-580                                                              |                  |                      |
| Comment              |                                                                     |                  |                      |

### Acquisition Parameter

|             |            |                       |           |                  |           |
|-------------|------------|-----------------------|-----------|------------------|-----------|
| Source Type | ESI        | Ion Polarity          | Positive  | Set Nebulizer    | 0.4 Bar   |
| Focus       | Not active | Set Capillary         | 4600 V    | Set Dry Heater   | 180 °C    |
| Scan Begin  | 50 m/z     | Set End Plate Offset  | -500 V    | Set Dry Gas      | 4.0 l/min |
| Scan End    | 3000 m/z   | Set Collision Cell RF | 130.0 Vpp | Set Divert Valve | Waste     |

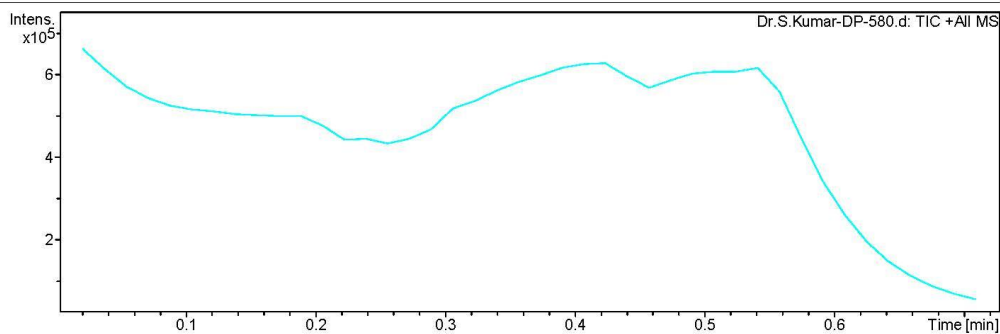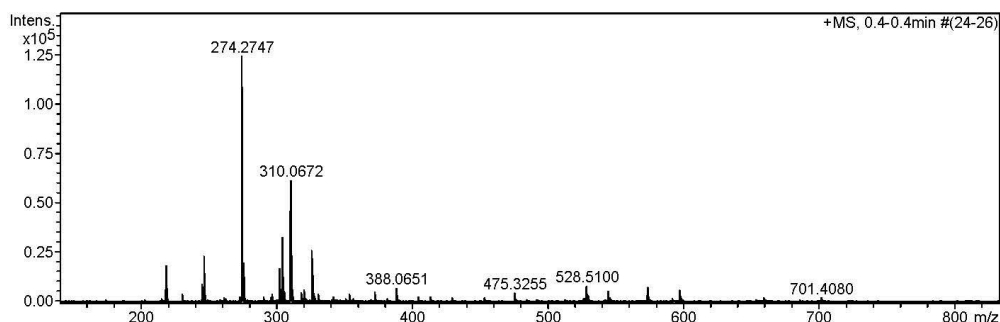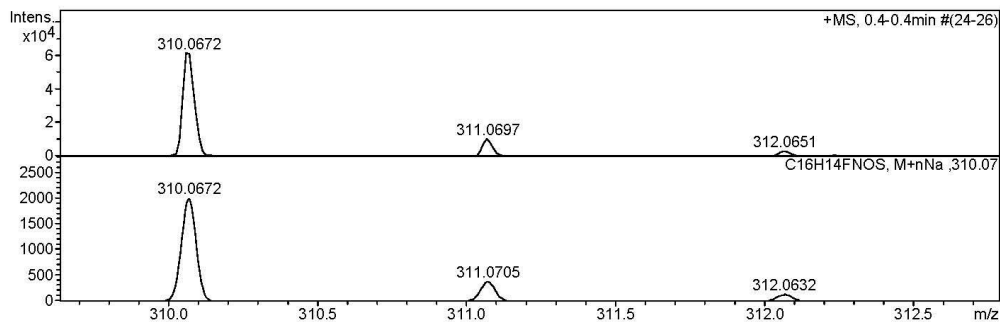



# HRMS spectra of compound **2d**

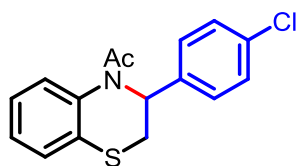

## Display Report

|                      |                                                                     |                  |                      |
|----------------------|---------------------------------------------------------------------|------------------|----------------------|
| <b>Analysis Info</b> |                                                                     | Acquisition Date | 4/24/2015 4:32:26 PM |
| Analysis Name        | D:\Data\user data\2015\April-2015\24-April-2015\Dr.S.Kumar-DP-556.d | Operator         | RUCHI                |
| Method               | tune_low.m                                                          | Instrument       | micrOTOF-Q II 10330  |
| Sample Name          | DP-556                                                              |                  |                      |
| Comment              |                                                                     |                  |                      |

### Acquisition Parameter

|             |            |                       |           |                  |           |
|-------------|------------|-----------------------|-----------|------------------|-----------|
| Source Type | ESI        | Ion Polarity          | Positive  | Set Nebulizer    | 0.4 Bar   |
| Focus       | Not active | Set Capillary         | 4600 V    | Set Dry Heater   | 180 °C    |
| Scan Begin  | 50 m/z     | Set End Plate Offset  | -500 V    | Set Dry Gas      | 4.0 l/min |
| Scan End    | 3000 m/z   | Set Collision Cell RF | 130.0 Vpp | Set Divert Valve | Waste     |

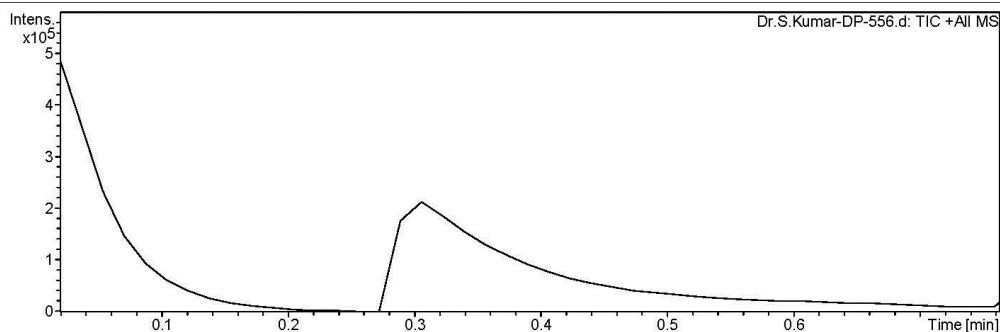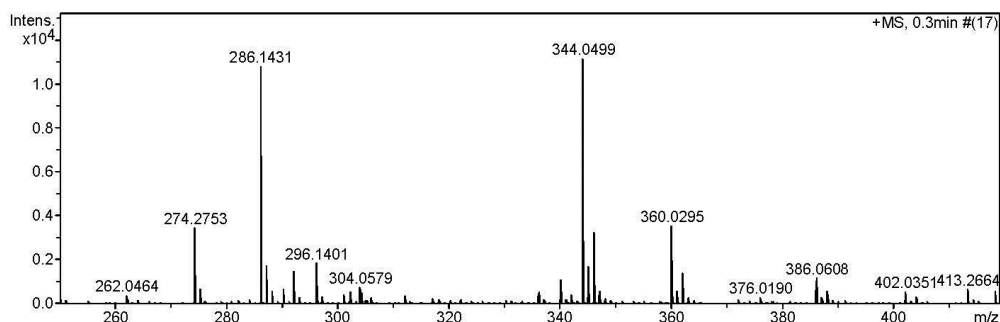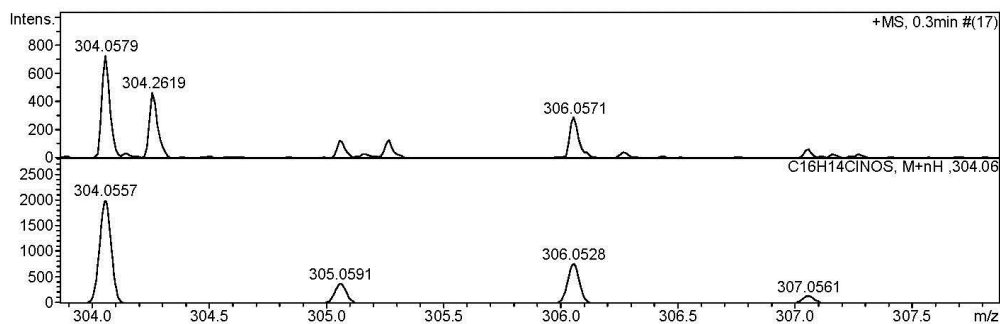

# HRMS spectra of compound 2e

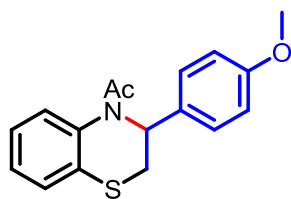

## Display Report

**Analysis Info**

|               |                                                                                    |                  |                      |
|---------------|------------------------------------------------------------------------------------|------------------|----------------------|
| Analysis Name | D:\Data\user data\2015\JUNE-2015\29-JUNE-2015\Dr.S.Kumar-DP-534-R3_1-A,4_01_2942.d | Acquisition Date | 6/29/2015 1:26:44 PM |
| Method        | HRLCMS-20 Sept.m                                                                   | Operator         | RUCHI                |
| Sample Name   | Dr.S.Kumar-DP-534-R3                                                               | Instrument       | micrOTOF-Q II 10330  |
| Comment       |                                                                                    |                  |                      |

### Acquisition Parameter

|             |          |                       |           |                  |           |
|-------------|----------|-----------------------|-----------|------------------|-----------|
| Source Type | ESI      | Ion Polarity          | Positive  | Set Nebulizer    | 1.2 Bar   |
| Focus       | Active   | Set Capillary         | 4500 V    | Set Dry Heater   | 200 °C    |
| Scan Begin  | 50 m/z   | Set End Plate Offset  | -500 V    | Set Dry Gas      | 7.0 l/min |
| Scan End    | 3000 m/z | Set Collision Cell RF | 130.0 Vpp | Set Divert Valve | Waste     |

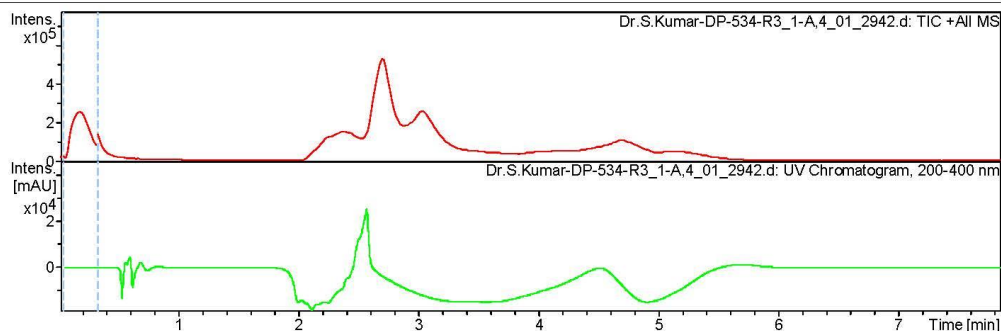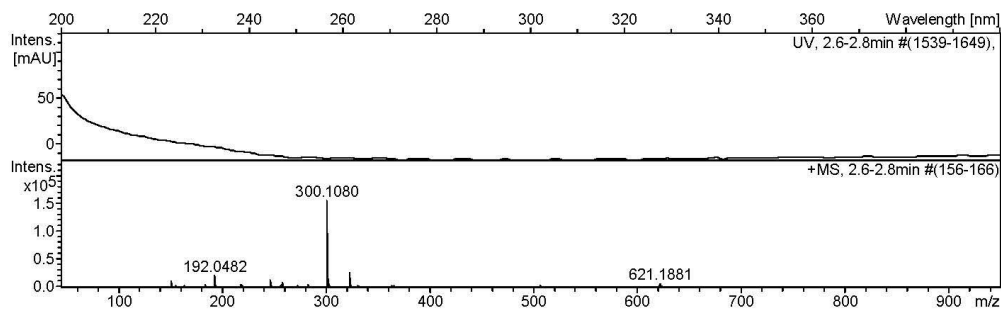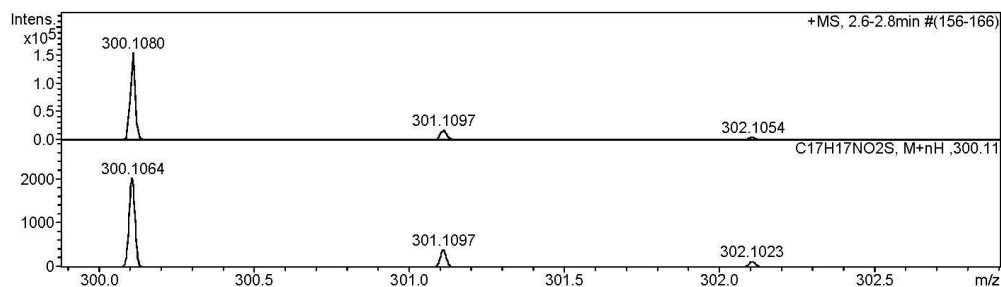

# HRMS spectra of compound 2f

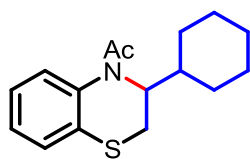

## Qualitative Compound Report

**Data File** DP-533(R2).D **Sample Name** DP-533(R2)  
**Sample Type** **Position** 2  
**Instrument Name** GCQTOF **User Name** Agilent-PC\admin  
**Acq Method** IISER\_GENERAL\_HP5\_80\_V30.M **Acquired Time** 05-Jun-15 5:11:32 PM  
**IRM Calibration Status** Success **DA Method** iSER13MAY 2013.m  
**Comment**

**Expected Barcode** **Sample Amount**  
**Dual Inj Vol** 0.1 **TuneName** Install\_tune.ei.tune\_1\_4\_13.tune.xml  
**TunePath** D:\MassHunter\GCMS\1\7200 **TuneDateStamp** 41954.1706  
**MSFirmwareVersion** G.7200.01.09 **OperatorName** Agilent-PC\admin  
**RunCompletedFlag** TRUE

### Compound Table

| Compound Label       | RT    | Mass     | Abund | Formula       | Tgt Mass | Diff (ppm) | MFG Formula   | DB Formula    |
|----------------------|-------|----------|-------|---------------|----------|------------|---------------|---------------|
| Cpd 1: C16 H21 N O S | 7.175 | 275.1375 | 34844 | C16 H21 N O S | 275.1344 | 11.3       | C16 H21 N O S | C16 H21 N O S |

| Compound Label       | m/z      | RT    | Algorithm       | Mass     |
|----------------------|----------|-------|-----------------|----------|
| Cpd 1: C16 H21 N O S | 275.1369 | 7.175 | Find By Formula | 275.1375 |

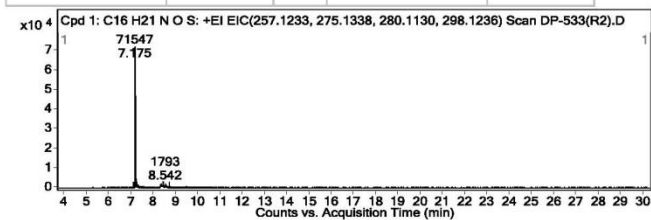

### MS Spectrum

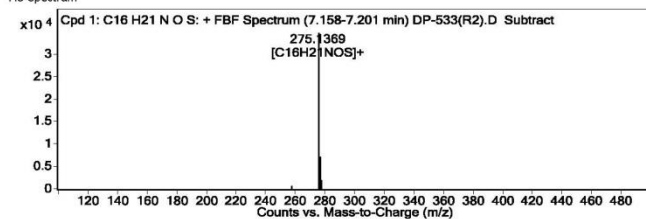

### MS Zoomed Spectrum

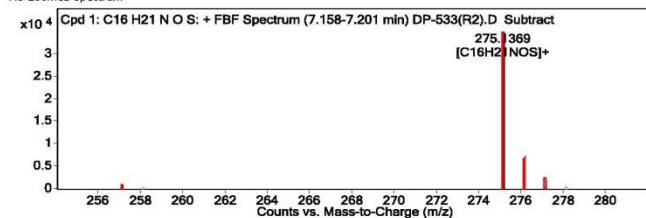

### MS Spectrum Peak List

| m/z      | z | Abund    | Formula   | Ion      |
|----------|---|----------|-----------|----------|
| 257.1255 | 1 | 891.77   | C16H21NOS | M+[-H2O] |
| 275.1369 | 1 | 34843.55 | C16H21NOS | M+       |
| 276.1403 | 1 | 7313.62  | C16H21NOS | M+       |

# HRMS spectra of compound 2g

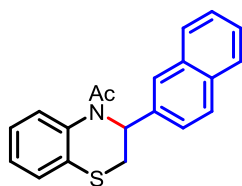

## Display Report

|                      |                                                                         |                  |                        |
|----------------------|-------------------------------------------------------------------------|------------------|------------------------|
| <b>Analysis Info</b> |                                                                         | Acquisition Date | 11/18/2014 11:59:52 PM |
| Analysis Name        | D:\Data\user data\2014\NOVEMBER\19 NOV\Dr.S.Kumar-DP-547_1-A,5_01_806.d | Operator         | RUCHI                  |
| Method               | HRLCMS-20 Sept.m                                                        | Instrument       | microTOF-Q II 10330    |
| Sample Name          | Dr.S.Kumar-DP-547                                                       |                  |                        |
| Comment              |                                                                         |                  |                        |

### Acquisition Parameter

|             |          |                       |           |                  |           |
|-------------|----------|-----------------------|-----------|------------------|-----------|
| Source Type | ESI      | Ion Polarity          | Positive  | Set Nebulizer    | 1.2 Bar   |
| Focus       | Active   | Set Capillary         | 4500 V    | Set Dry Heater   | 200 °C    |
| Scan Begin  | 50 m/z   | Set End Plate Offset  | -500 V    | Set Dry Gas      | 7.0 l/min |
| Scan End    | 3000 m/z | Set Collision Cell RF | 130.0 Vpp | Set Divert Valve | Waste     |

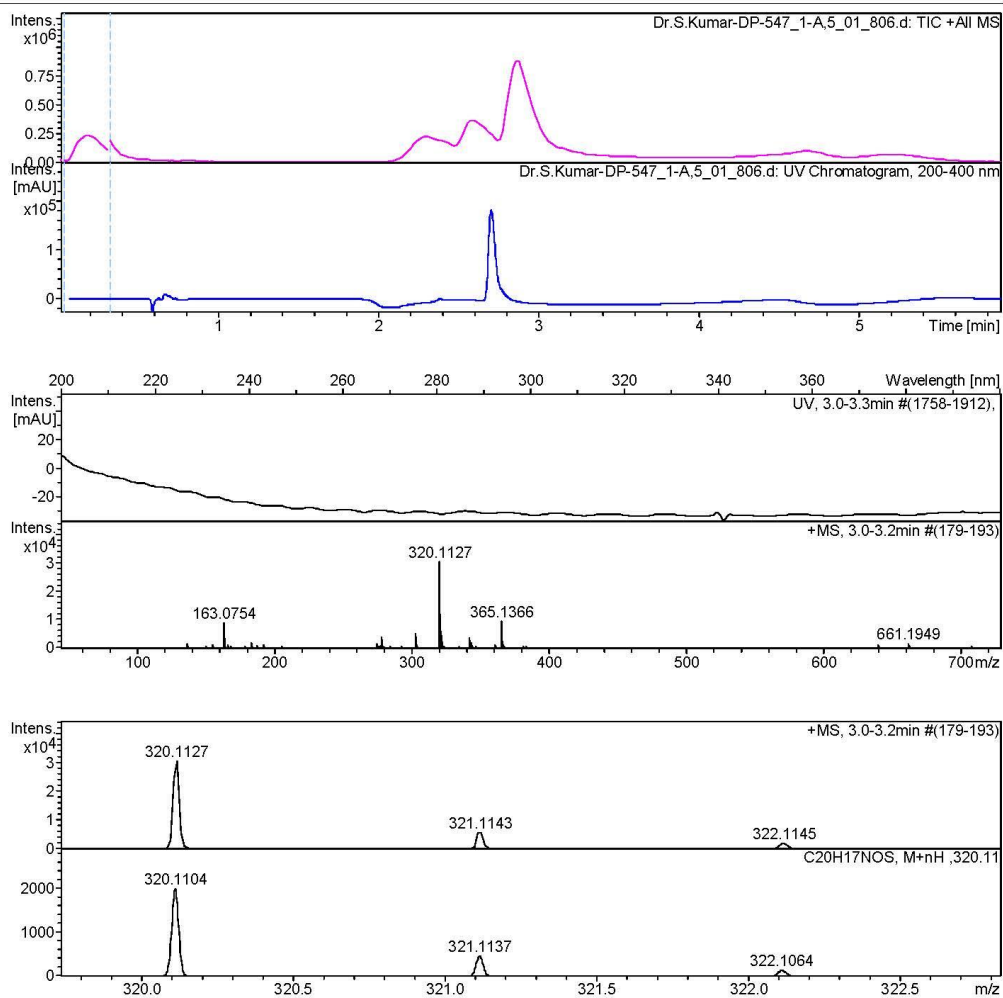

# HRMS spectra of compound 2h

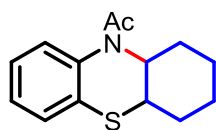

## Display Report

**Analysis Info**  
Analysis Name: D:\Data\user data\2015\JUNE-2015\02-JUNE-2015\Dr.S.Kumar-DP-564.d  
Method: tune\_low.m  
Sample Name: DP-564  
Comment:  
Acquisition Date: 6/2/2015 4:42:50 PM  
Operator: RUCHI  
Instrument: micrOTOF-Q II 10330

**Acquisition Parameter**  
Source Type: ESI  
Focus: Not active  
Scan Begin: 50 m/z  
Scan End: 3000 m/z  
Ion Polarity: Positive  
Set Capillary: 4600 V  
Set End Plate Offset: -500 V  
Set Collision Cell RF: 130.0 Vpp  
Set Nebulizer: 0.4 Bar  
Set Dry Heater: 180 °C  
Set Dry Gas: 4.0 l/min  
Set Divert Valve: Waste

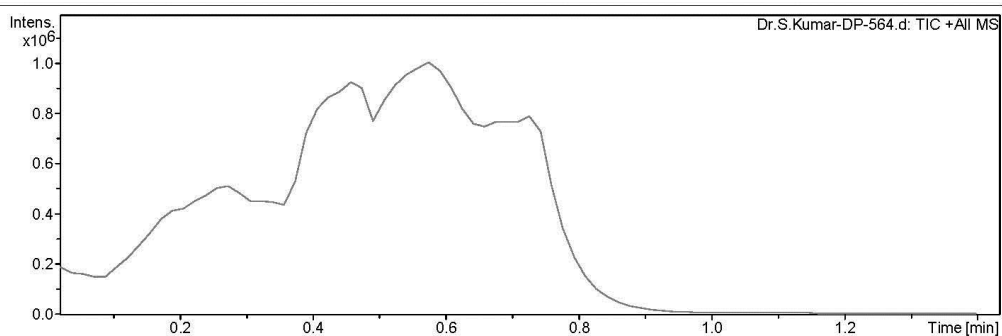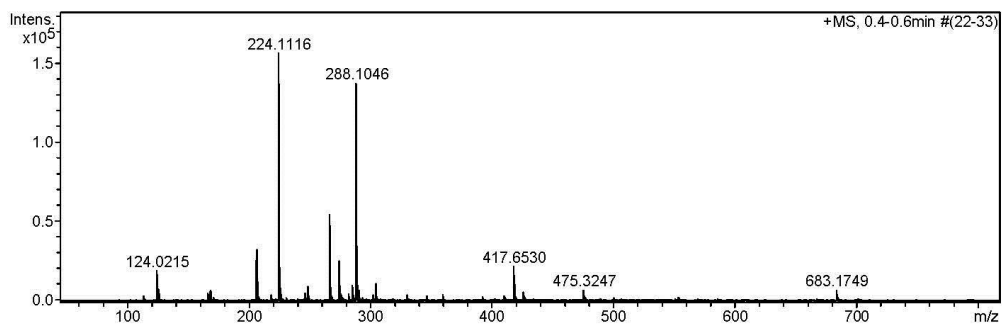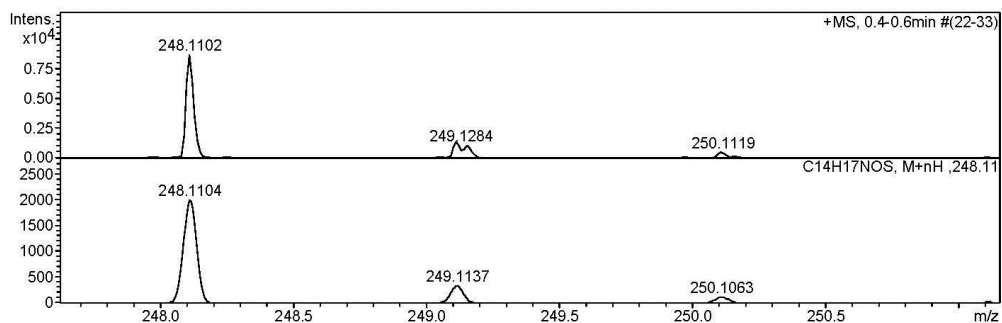

# HRMS spectra of compound 2i

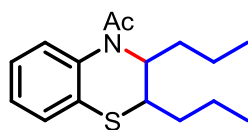

## Display Report

|                      |                                                                      |                  |                      |
|----------------------|----------------------------------------------------------------------|------------------|----------------------|
| <b>Analysis Info</b> |                                                                      | Acquisition Date | 6/4/2015 10:42:06 AM |
| Analysis Name        | D:\Data\user data\2015\JUNE-2015\04-june-2015\Dr.S.Kumar-DP-536-R2.d | Operator         | RUCHI                |
| Method               | tune_low.m                                                           | Instrument       | micrOTOF-Q II 10330  |
| Sample Name          | DP-536-R2                                                            |                  |                      |
| Comment              |                                                                      |                  |                      |

### Acquisition Parameter

|             |            |                       |           |                  |           |
|-------------|------------|-----------------------|-----------|------------------|-----------|
| Source Type | ESI        | Ion Polarity          | Positive  | Set Nebulizer    | 0.4 Bar   |
| Focus       | Not active | Set Capillary         | 4600 V    | Set Dry Heater   | 180 °C    |
| Scan Begin  | 50 m/z     | Set End Plate Offset  | -500 V    | Set Dry Gas      | 4.0 l/min |
| Scan End    | 3000 m/z   | Set Collision Cell RF | 130.0 Vpp | Set Divert Valve | Waste     |

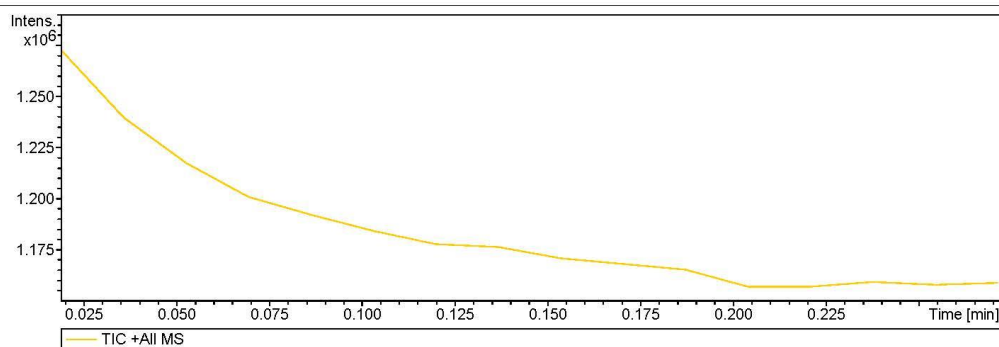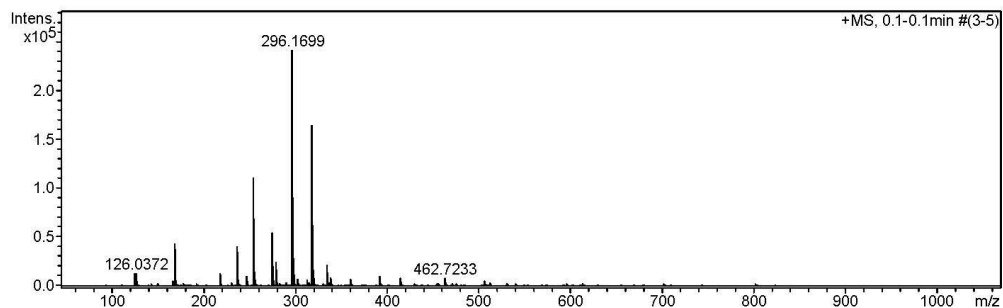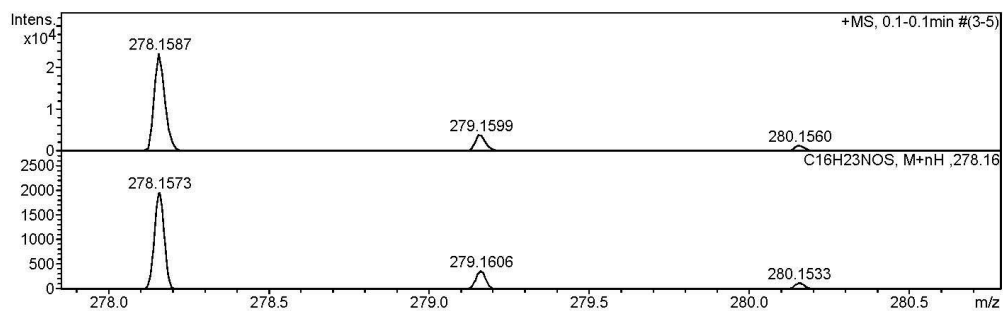

# HRMS spectra of compound 2j

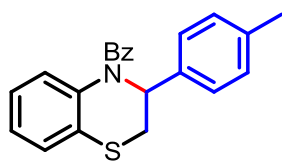

## Display Report

|                      |                                                                     |                  |                     |
|----------------------|---------------------------------------------------------------------|------------------|---------------------|
| <b>Analysis Info</b> |                                                                     | Acquisition Date | 6/1/2015 5:01:46 PM |
| Analysis Name        | D:\Data\user data\2015\JUNE-2015\01-JUNE-2015\Dr.S.Kumar-DP-554-1.d | Operator         | RUCHI               |
| Method               | tune_wide.m                                                         | Instrument       | micrOTOF-Q II 10330 |
| Sample Name          | DP-554-1                                                            |                  |                     |
| Comment              |                                                                     |                  |                     |

### Acquisition Parameter

|             |            |                       |           |                  |           |
|-------------|------------|-----------------------|-----------|------------------|-----------|
| Source Type | ESI        | Ion Polarity          | Positive  | Set Nebulizer    | 0.4 Bar   |
| Focus       | Not active | Set Capillary         | 4500 V    | Set Dry Heater   | 180 °C    |
| Scan Begin  | 50 m/z     | Set End Plate Offset  | -500 V    | Set Dry Gas      | 4.0 l/min |
| Scan End    | 3000 m/z   | Set Collision Cell RF | 600.0 Vpp | Set Divert Valve | Waste     |

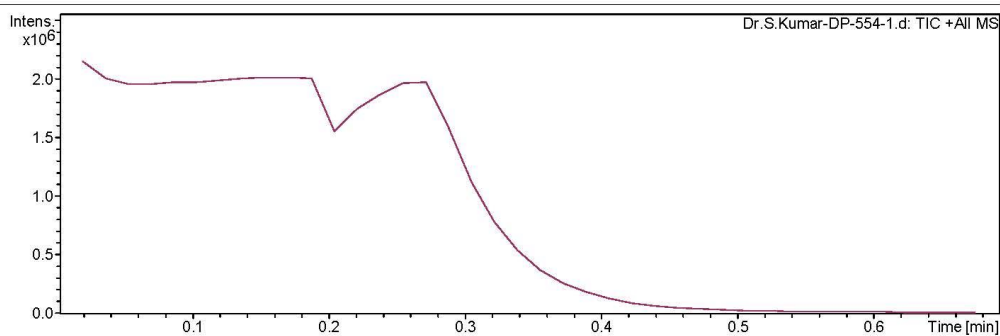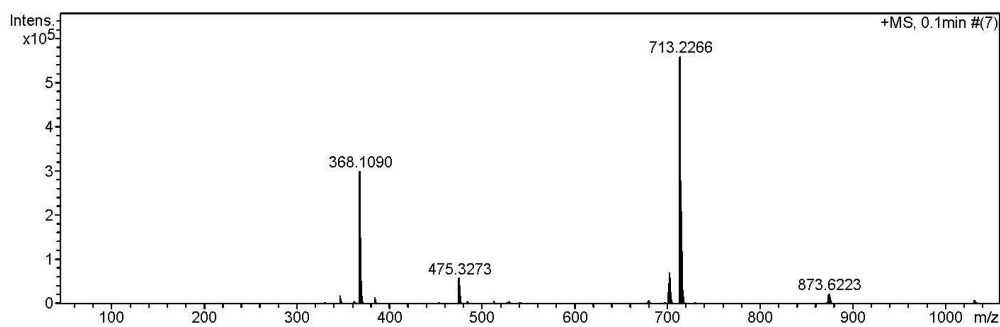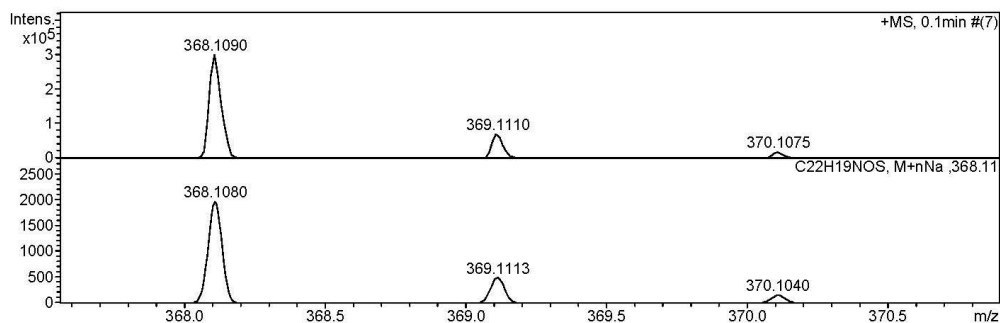

# HRMS spectra of compound 2k

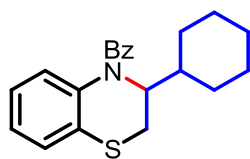

## Qualitative Compound Report

**Data File** DP-598.D **Sample Name** DP-598  
**Sample Type** **Position** 1  
**Instrument Name** GCQTOF **User Name** Agilent-PC\admin  
**Acq Method** IISER\_GENERAL\_HP5\_80\_V30.M **Acquired Time** 05-Jun-15 4:38:34 PM  
**IRM Calibration Status** Success **DA Method** IISER13MAY 2013.m  
**Comment**  
**Expected Barcode** **Sample Amount**  
**Dual Inj Vol** 0.1 **TuneName** Install\_tune.ei.tune\_1\_4\_13.tune.xml  
**TunePath** D:\MassHunter\GCMS\117200 **TuneDateStamp** 41954.1706  
**MSFirmwareVersion** G.7200.01.09 **OperatorName** Agilent-PC\admin  
**RunCompletedFlag** TRUE

### Compound Table

| Compound Label       | RT     | Mass     | Abund | Formula       | Tgt Mass | DRT (ppm) | MFG Formula   | DB Formula    |
|----------------------|--------|----------|-------|---------------|----------|-----------|---------------|---------------|
| Cpd 1: C21 H23 N O S | 16.324 | 337.1513 | 1079  | C21 H23 N O S | 337.15   | 3.68      | C21 H23 N O S | C21 H23 N O S |

| Compound Label       | m/z      | RT     | Algorithm       | Mass     |
|----------------------|----------|--------|-----------------|----------|
| Cpd 1: C21 H23 N O S | 337.1521 | 16.324 | Find By Formula | 337.1513 |

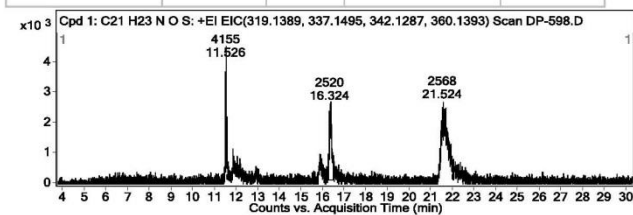

### MS Spectrum

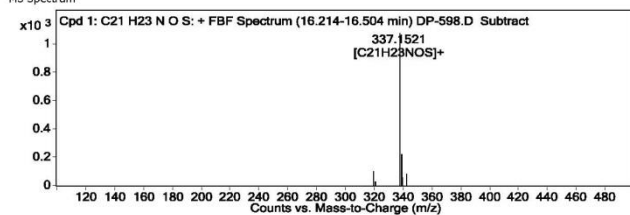

### MS Zoomed Spectrum

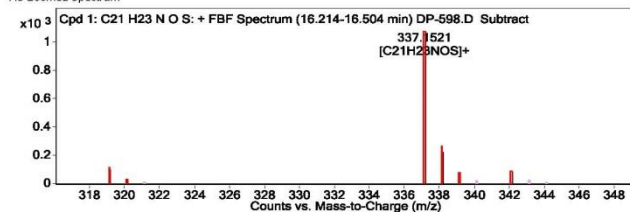

### MS Spectrum Peak List

| m/z      | z | Abund   | Formula   | Ion      |
|----------|---|---------|-----------|----------|
| 319.1399 | 1 | 103.38  | C21H23NOS | M+[-H2O] |
| 320.1485 | 1 | 31.97   | C21H23NOS | M+[-H2O] |
| 337.1521 | 1 | 1079.15 | C21H23NOS | M+       |
| 338.1541 | 1 | 227.3   | C21H23NOS | M+       |
| 339.1374 | 1 | 60.86   | C21H23NOS | M+       |



# HRMS spectra of compound 21

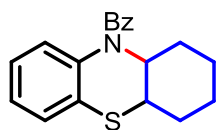

## Display Report

|                      |                                                                     |                  |                     |
|----------------------|---------------------------------------------------------------------|------------------|---------------------|
| <b>Analysis Info</b> |                                                                     | Acquisition Date | 6/2/2015 4:45:48 PM |
| Analysis Name        | D:\Data\user data\2015\JUNE-2015\02-JUNE-2015\Dr.S.Kumar-DP-562-R.d | Operator         | RUCHI               |
| Method               | tune_low.m                                                          | Instrument       | micrOTOF-Q II 10330 |
| Sample Name          | DP-562-R                                                            |                  |                     |
| Comment              |                                                                     |                  |                     |

### Acquisition Parameter

|             |            |                       |           |                  |           |
|-------------|------------|-----------------------|-----------|------------------|-----------|
| Source Type | ESI        | Ion Polarity          | Positive  | Set Nebulizer    | 0.4 Bar   |
| Focus       | Not active | Set Capillary         | 4600 V    | Set Dry Heater   | 180 °C    |
| Scan Begin  | 50 m/z     | Set End Plate Offset  | -500 V    | Set Dry Gas      | 4.0 l/min |
| Scan End    | 3000 m/z   | Set Collision Cell RF | 130.0 Vpp | Set Divert Valve | Waste     |

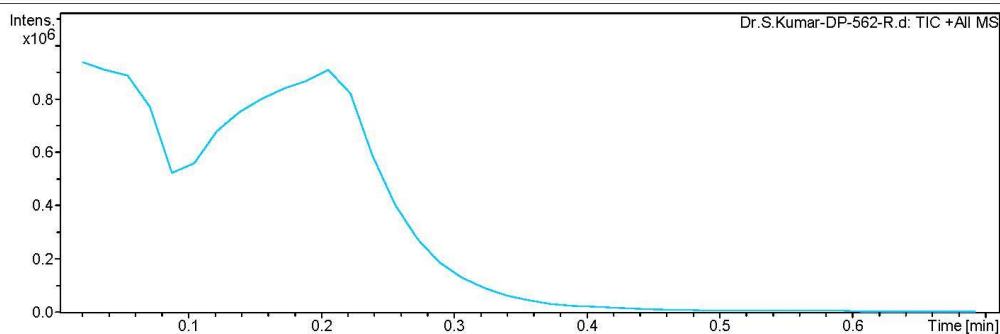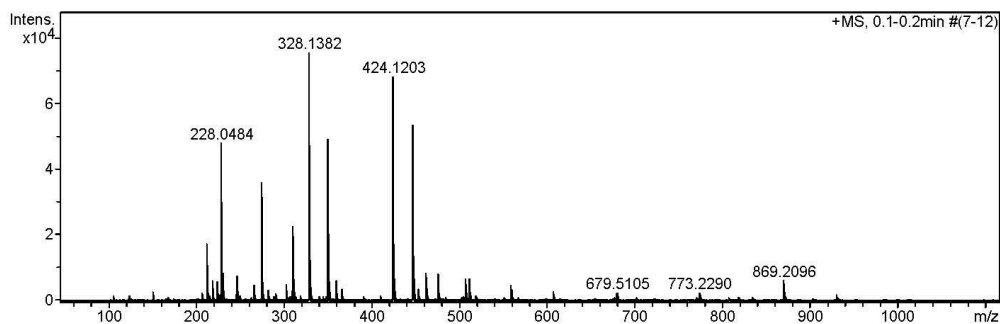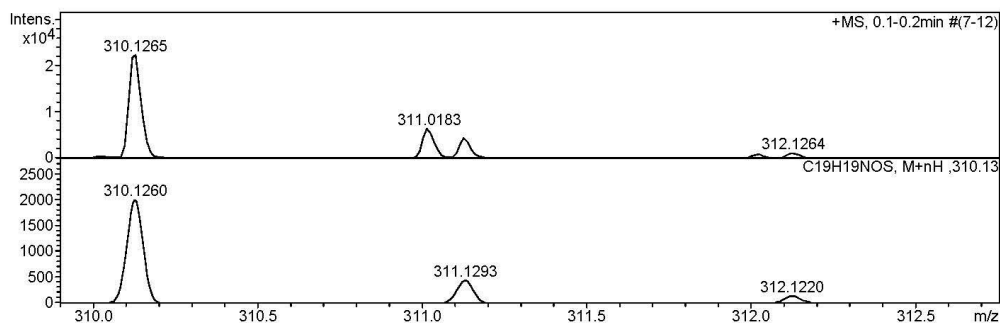

# HRMS spectra of compound 3a

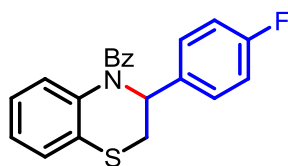

## Display Report

|                      |                                                                       |                  |                      |
|----------------------|-----------------------------------------------------------------------|------------------|----------------------|
| <b>Analysis Info</b> |                                                                       | Acquisition Date | 4/24/2015 4:43:39 PM |
| Analysis Name        | D:\Data\user data\2015\April-2015\24-April-2015\Dr.S.Kumar-DP-566-1.d | Operator         | RUCHI                |
| Method               | tune_low.m                                                            | Instrument       | micrOTOF-Q II 10330  |
| Sample Name          | DP-566-1                                                              |                  |                      |
| Comment              |                                                                       |                  |                      |

### Acquisition Parameter

|             |            |                       |           |                  |           |
|-------------|------------|-----------------------|-----------|------------------|-----------|
| Source Type | ESI        | Ion Polarity          | Positive  | Set Nebulizer    | 0.4 Bar   |
| Focus       | Not active | Set Capillary         | 4600 V    | Set Dry Heater   | 180 °C    |
| Scan Begin  | 50 m/z     | Set End Plate Offset  | -500 V    | Set Dry Gas      | 4.0 l/min |
| Scan End    | 3000 m/z   | Set Collision Cell RF | 130.0 Vpp | Set Divert Valve | Waste     |

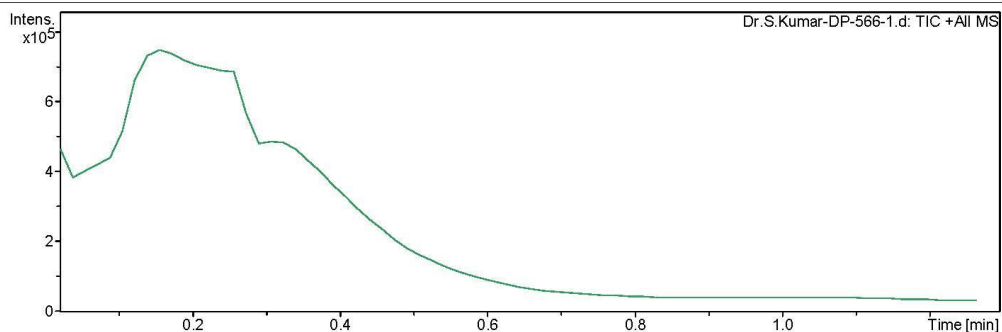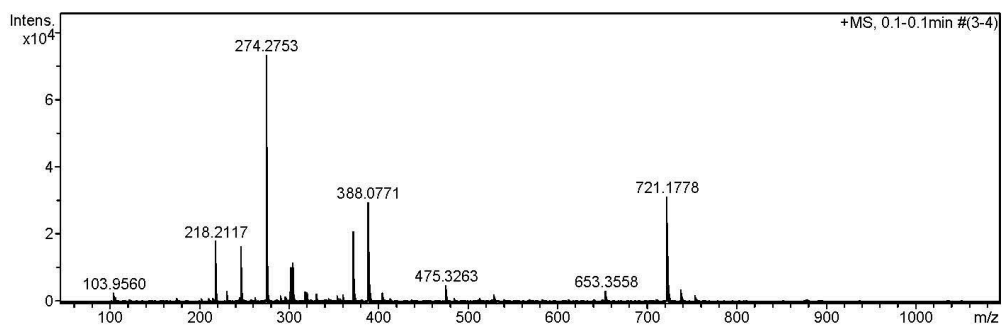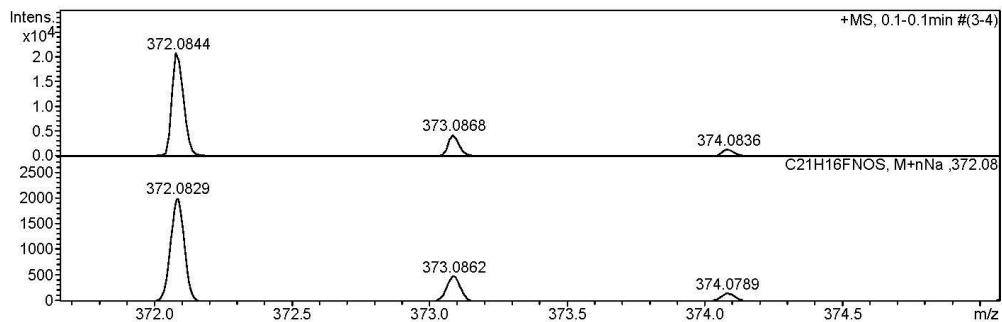

# HRMS spectra of compound **3b**

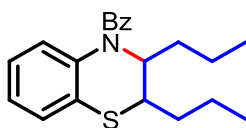

## Display Report

|                      |                                                                   |                  |                      |
|----------------------|-------------------------------------------------------------------|------------------|----------------------|
| <b>Analysis Info</b> |                                                                   | Acquisition Date | 6/4/2015 10:47:06 AM |
| Analysis Name        | D:\Data\user data\2015\JUNE-2015\04-june-2015\Dr.S.Kumar-DP-605.d | Operator         | RUCHI                |
| Method               | tune_low.m                                                        | Instrument       | micrOTOF-Q II 10330  |
| Sample Name          | DP-605                                                            |                  |                      |
| Comment              |                                                                   |                  |                      |

### Acquisition Parameter

|             |            |                       |           |                  |           |
|-------------|------------|-----------------------|-----------|------------------|-----------|
| Source Type | ESI        | Ion Polarity          | Positive  | Set Nebulizer    | 0.4 Bar   |
| Focus       | Not active | Set Capillary         | 4600 V    | Set Dry Heater   | 180 °C    |
| Scan Begin  | 50 m/z     | Set End Plate Offset  | -500 V    | Set Dry Gas      | 4.0 l/min |
| Scan End    | 3000 m/z   | Set Collision Cell RF | 430.0 Vpp | Set Divert Valve | Waste     |

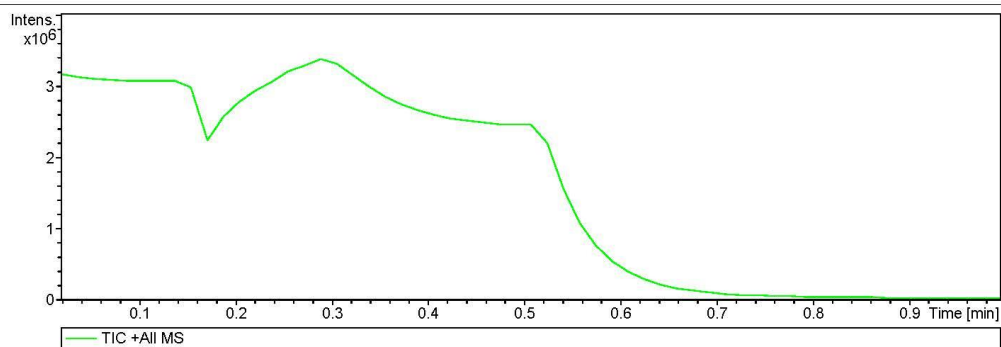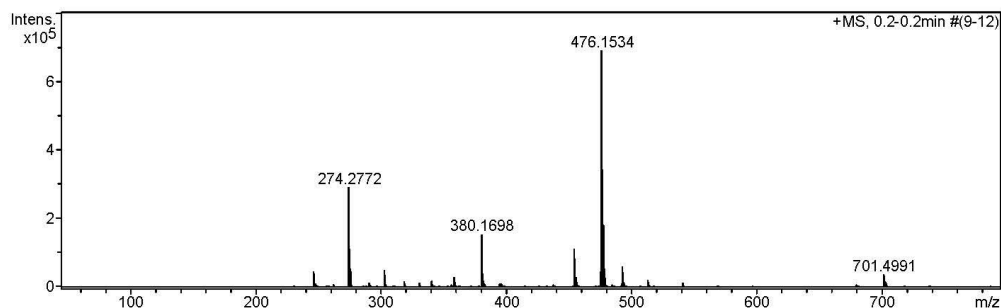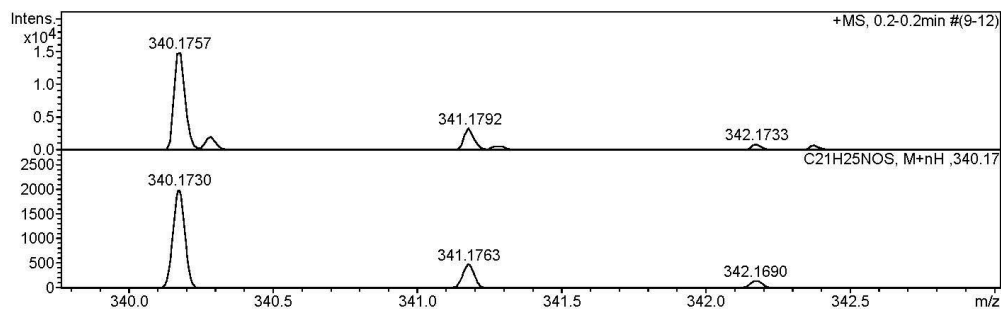

Supplement: c5ra12995h1.pdf [file c5ra12995h1.pdf]
