# Supplementary material for: Silver-mediated thio-acetoxylation and TFA triggered cyclization of amino disulfides with unactivated alkenes: synthesis of 3-aryl/alkyl-1,4-benzothiazines
Source: Royal Society of Chemistry journal article supplement (doi:10.1039/c5ra12995h), 2015-01-01
Supplement: c5ra12995h2.pdf [file c5ra12995h2.pdf]

## SUPPORTING INFORMATION

### **Silver Mediated Thio-Acetoxylation and TFA Triggered Cyclization of Amino Disulfides with Unactivated Alkenes: Synthesis of 3-Aryl/Alkyl-1,4-benzothiazines**

**Ch. Durga Prasad, Ajay Verma, Moh. Sattar, Sangit Kumar\***

Department of Chemistry, Indian Institute of Science Education and Research (IISER)

Bhopal, MP 462 066, India

E-mail: [sangitkumar@iiserb.ac.in](mailto:sangitkumar@iiserb.ac.in)

| <b>Contents</b>                                                          | <b>Page No.</b> |
|--------------------------------------------------------------------------|-----------------|
| <sup>1</sup> H, <sup>13</sup> C NMR Spectra of the synthesized compounds | S2-S32          |
| Crystallographic details of <b>1h</b> (CCDC No. 1409837)                 | S33-S43         |
| Crystallographic details of <b>2a</b> (CCDC No. 1409829)                 | S44-S50         |
| Crystallographic details of <b>2g</b> (CCDC No. 1409828)                 | S51-S58         |

### Spectral data of compound 1a

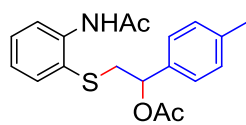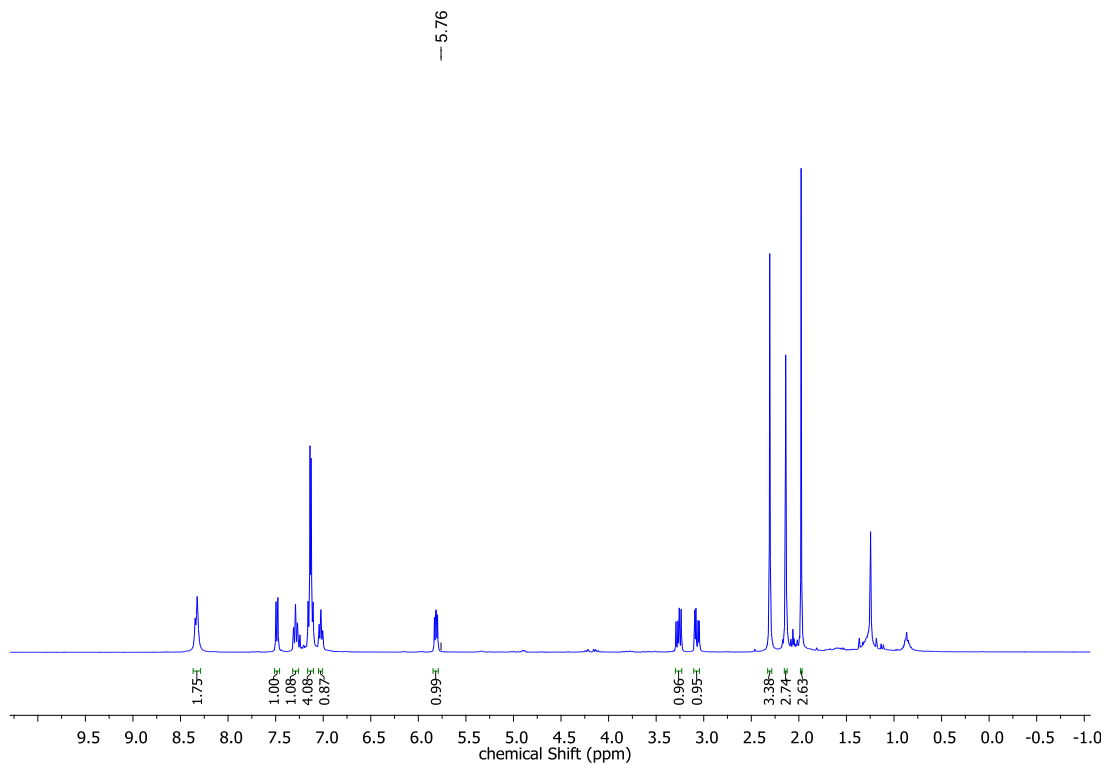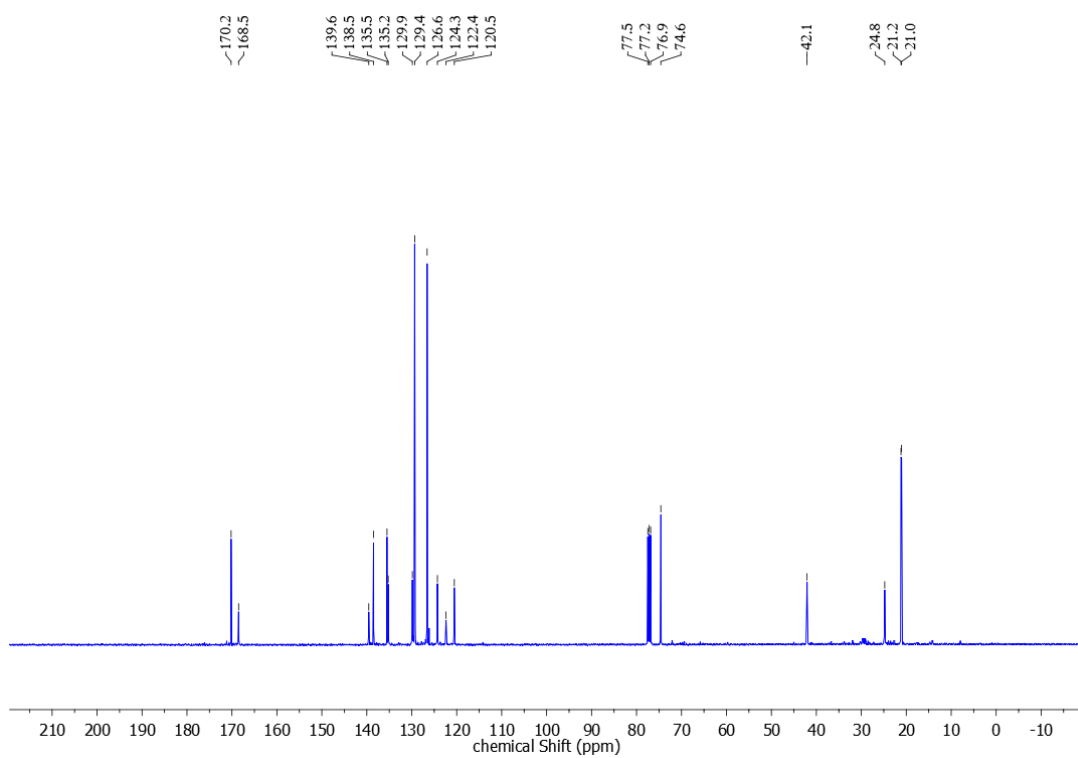

### Spectral data of compound 1b

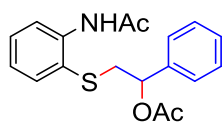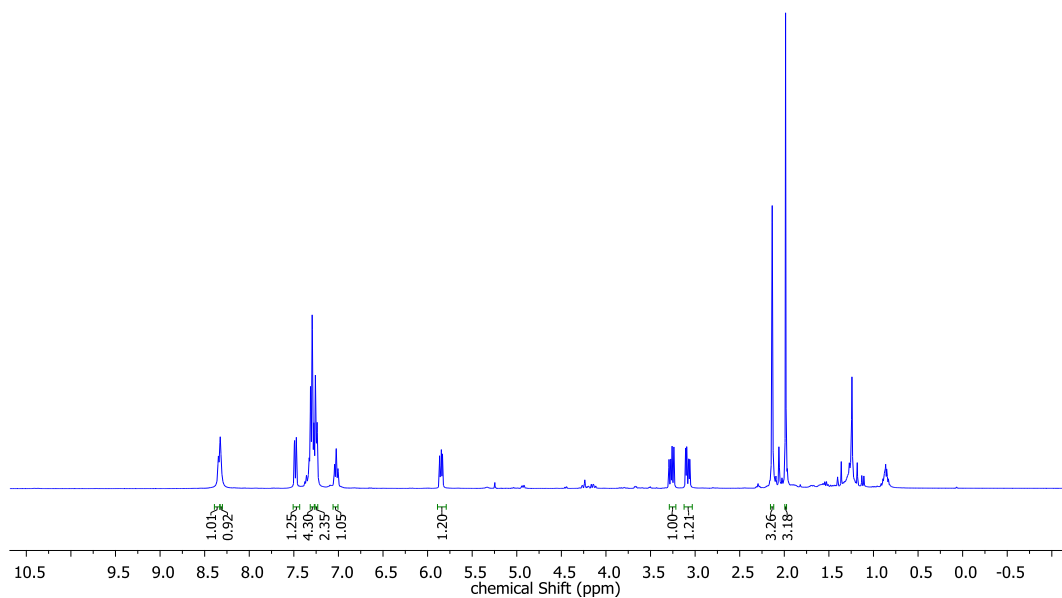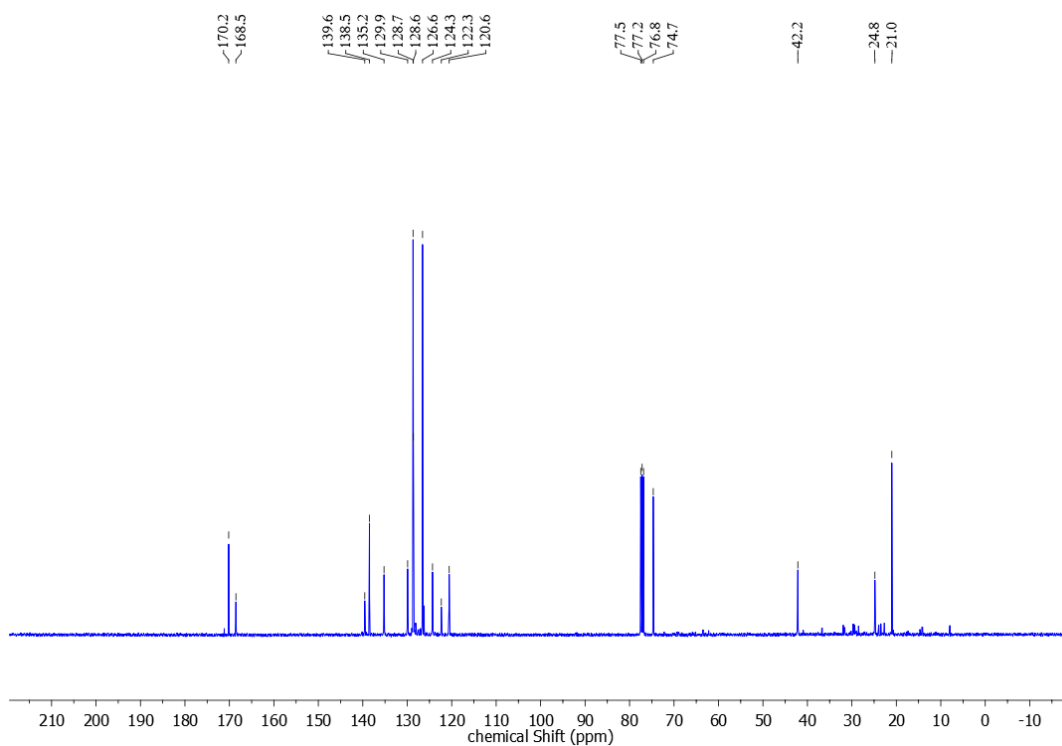

### Spectral data of compound 1c

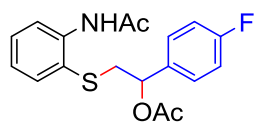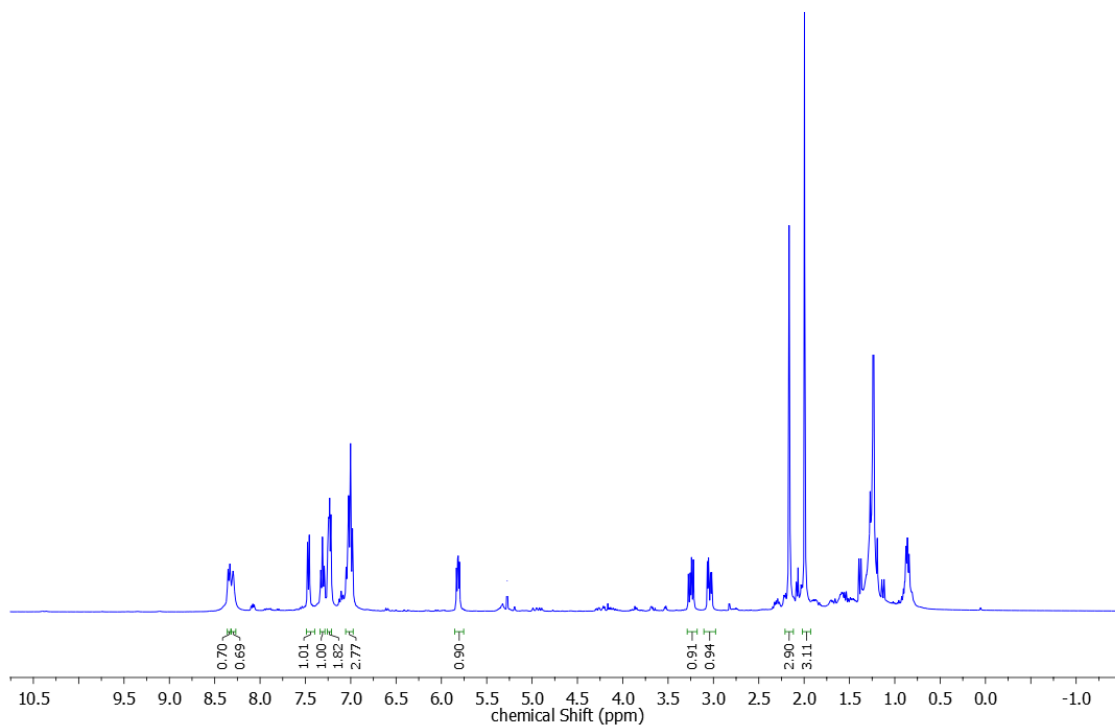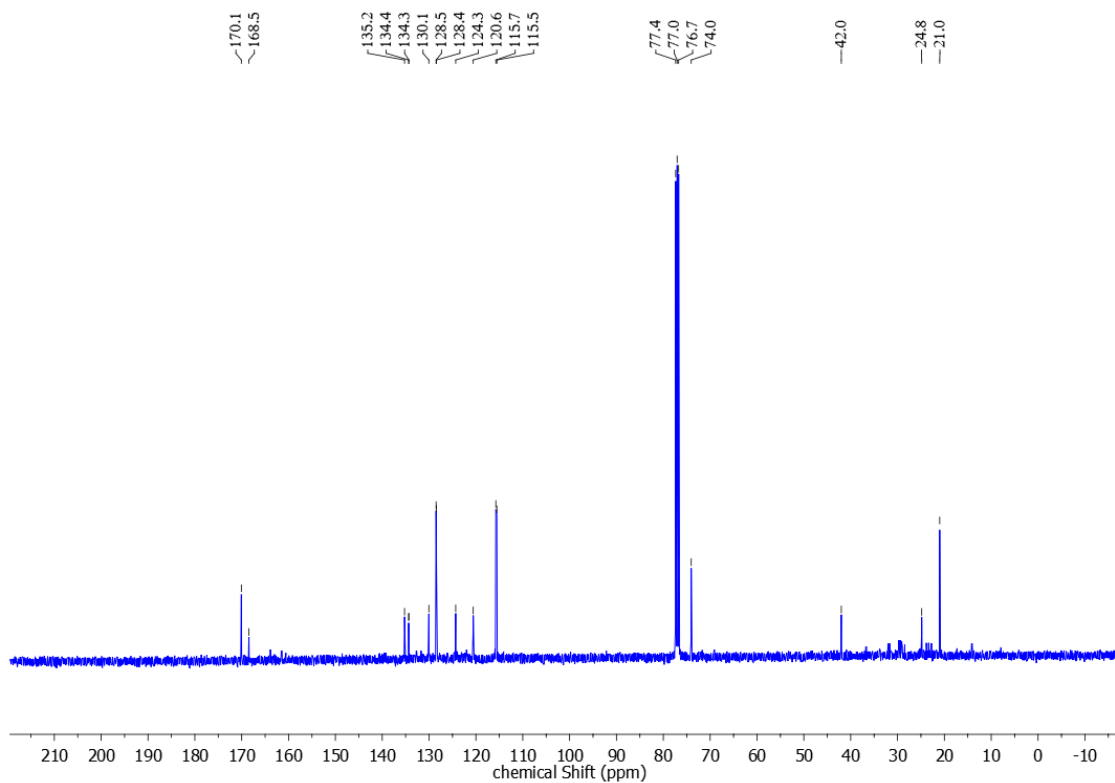

### Spectral data of compound 1d

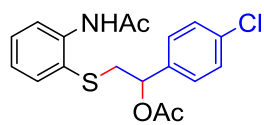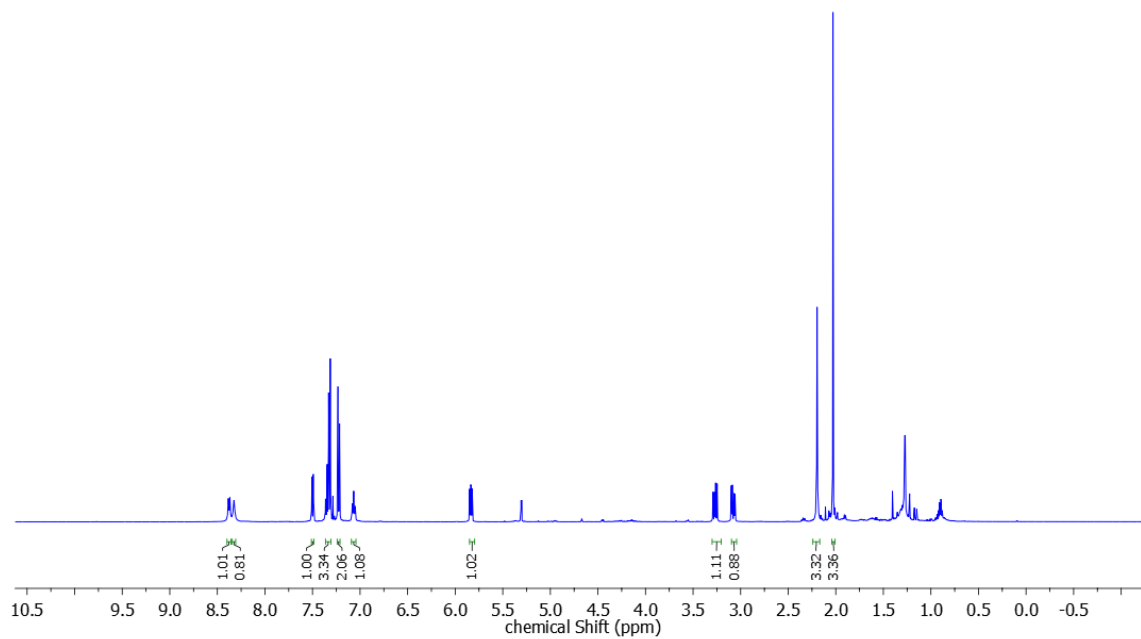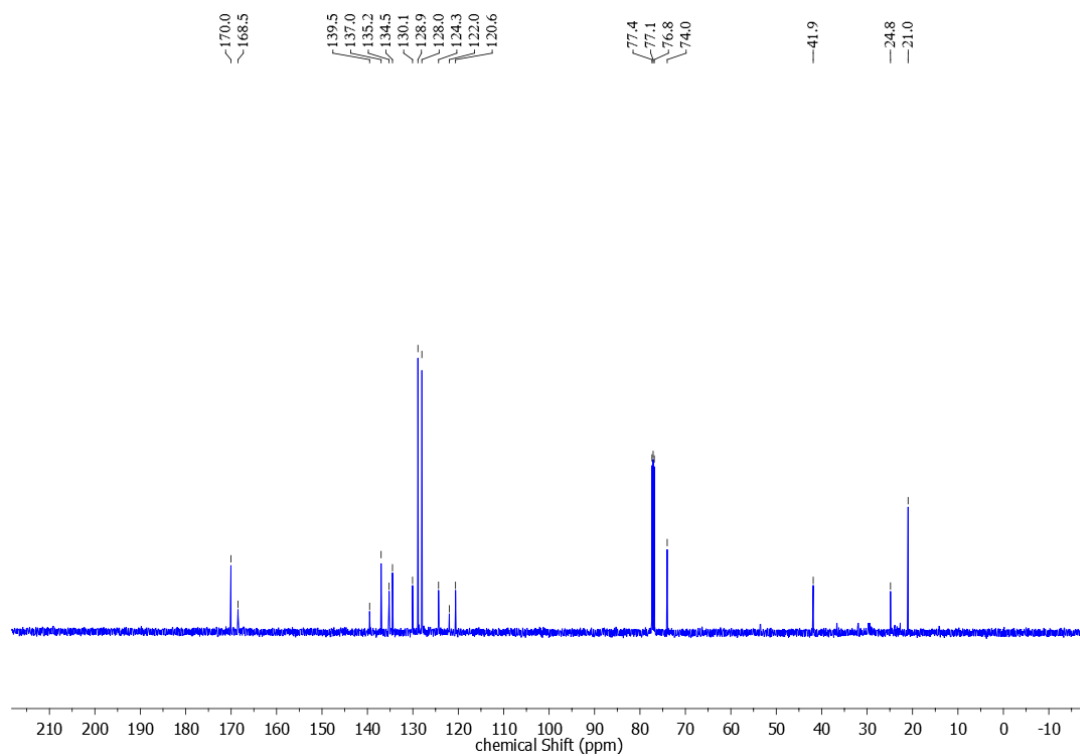

### Spectral data of compound 1e

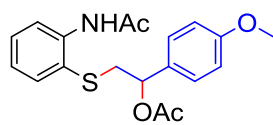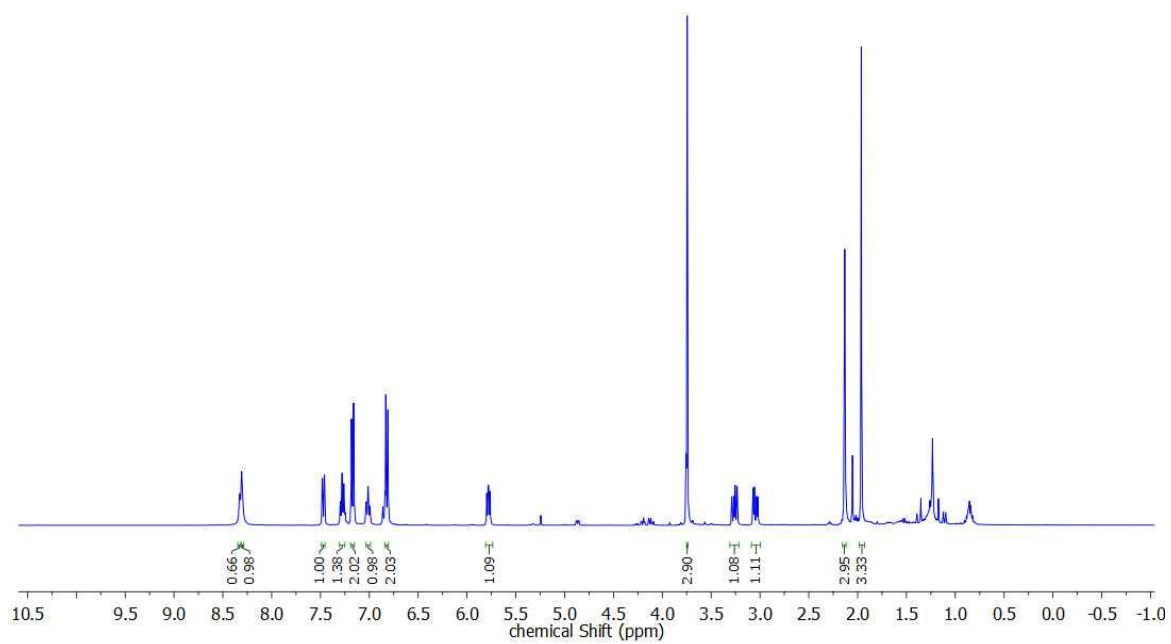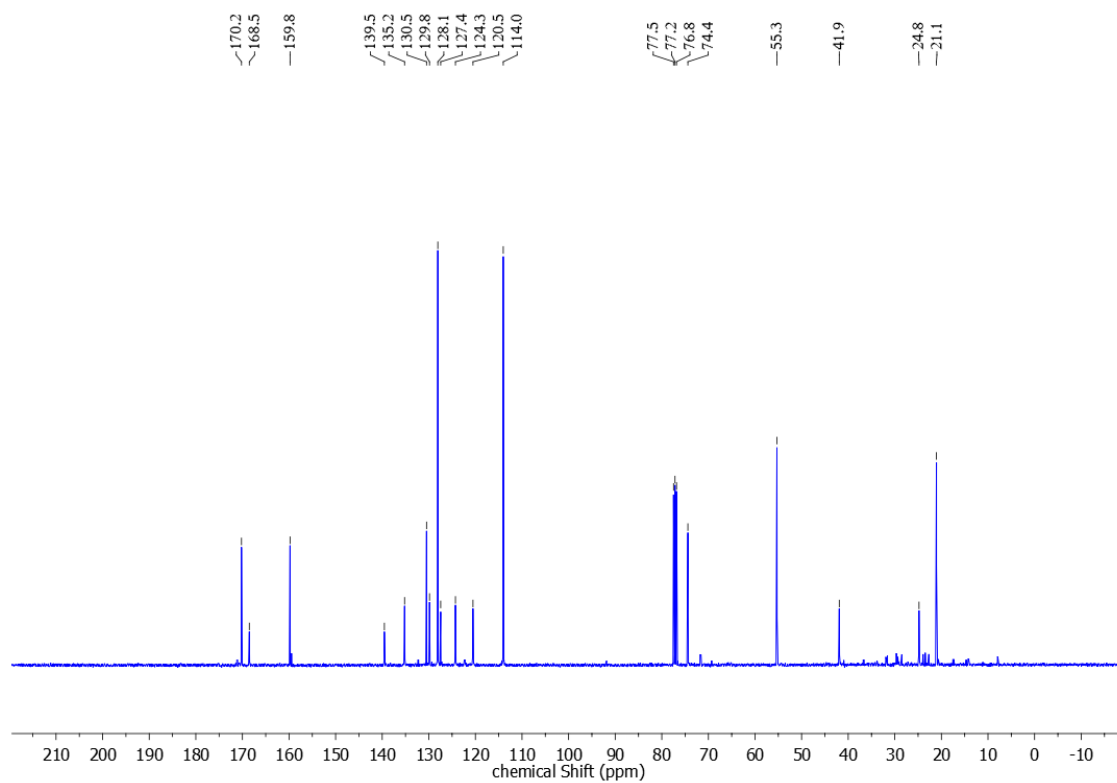



# Spectral data of compound 1g

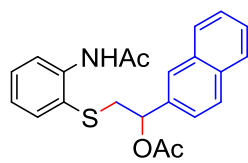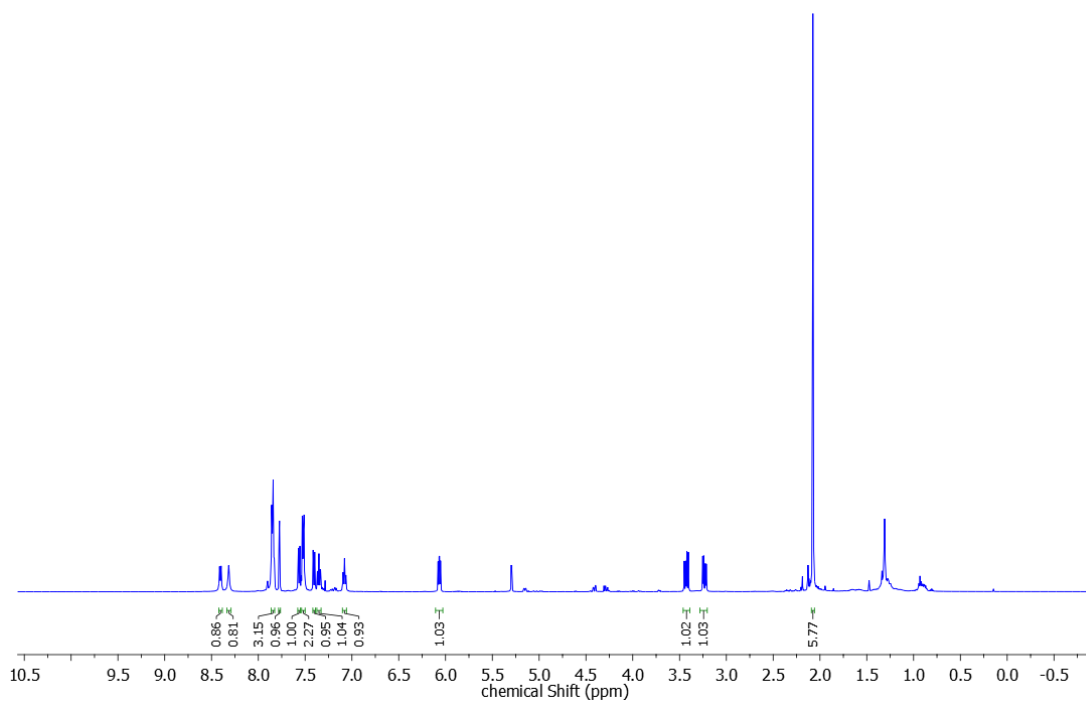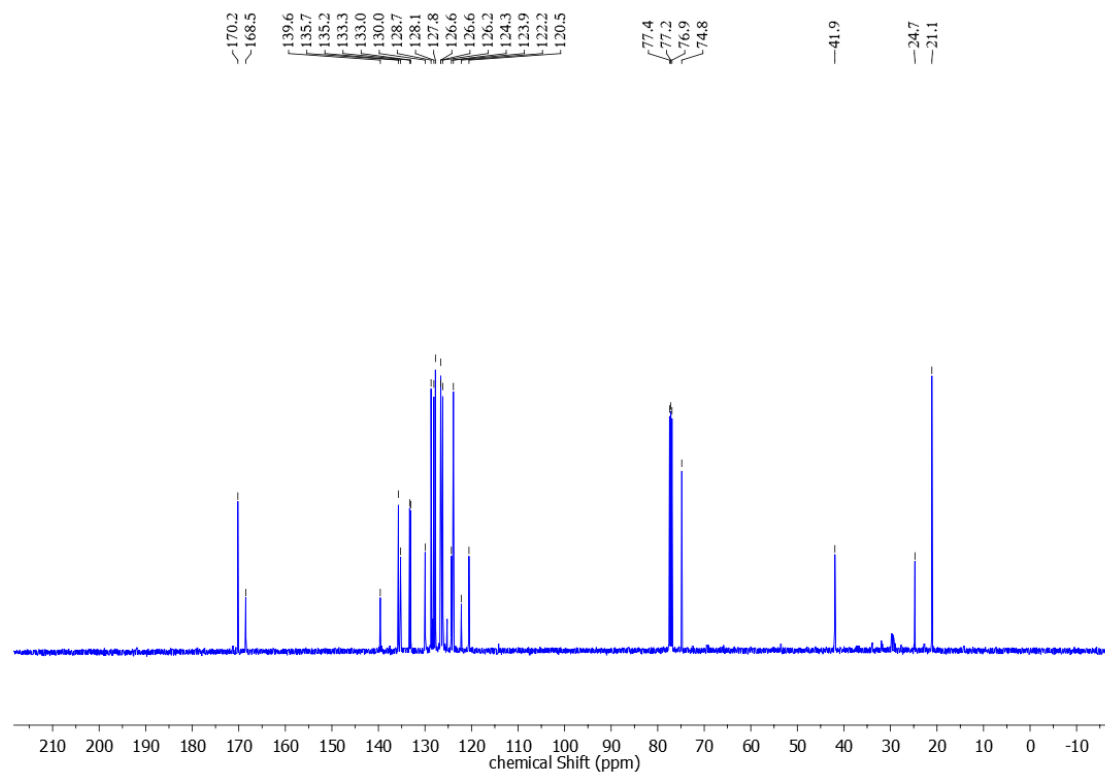



## Spectral data of compound 1h

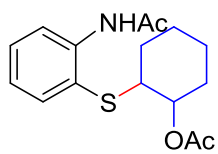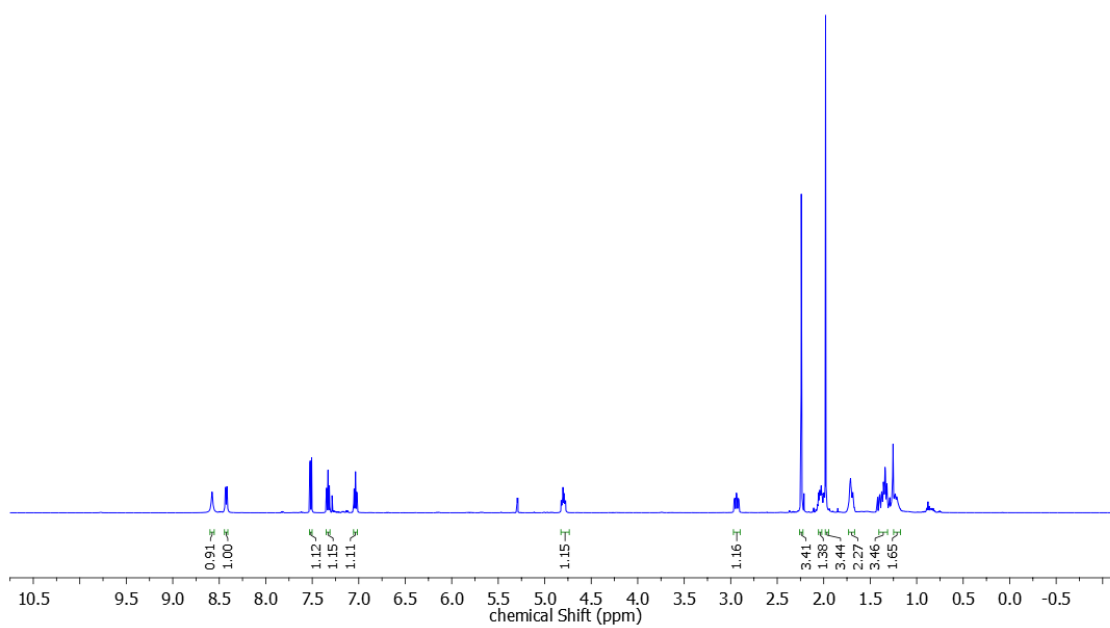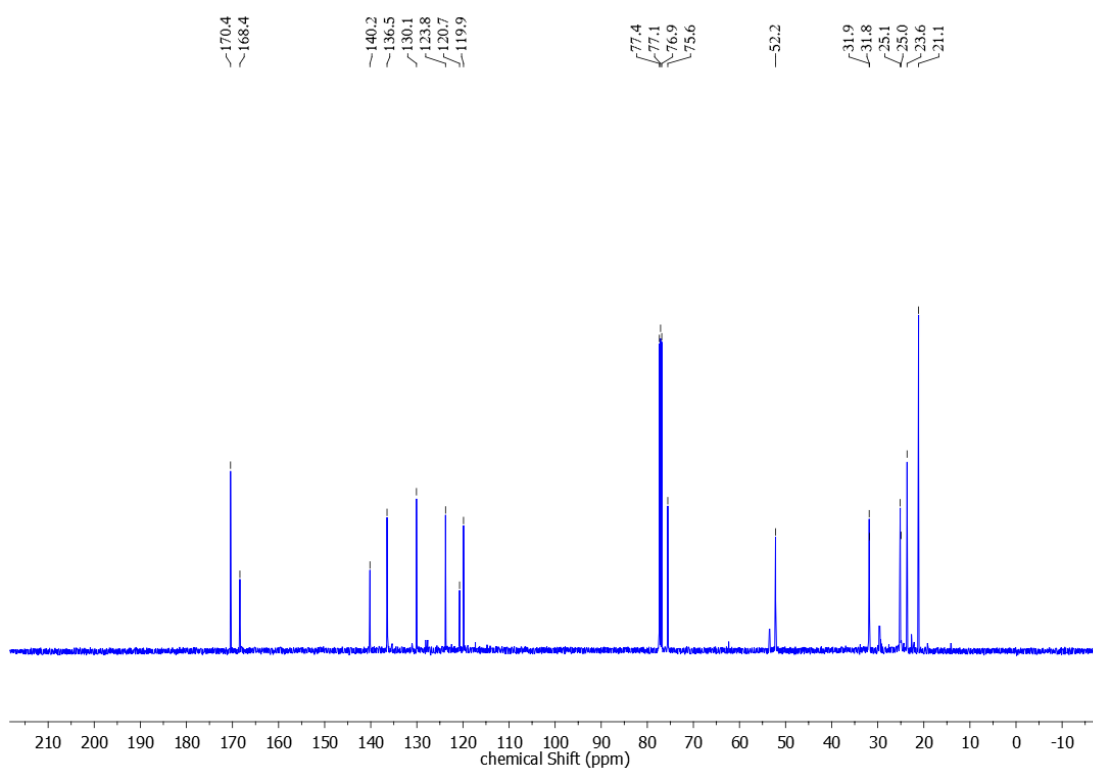

### Spectral data of compound 1i

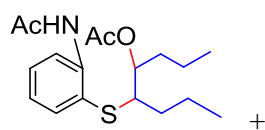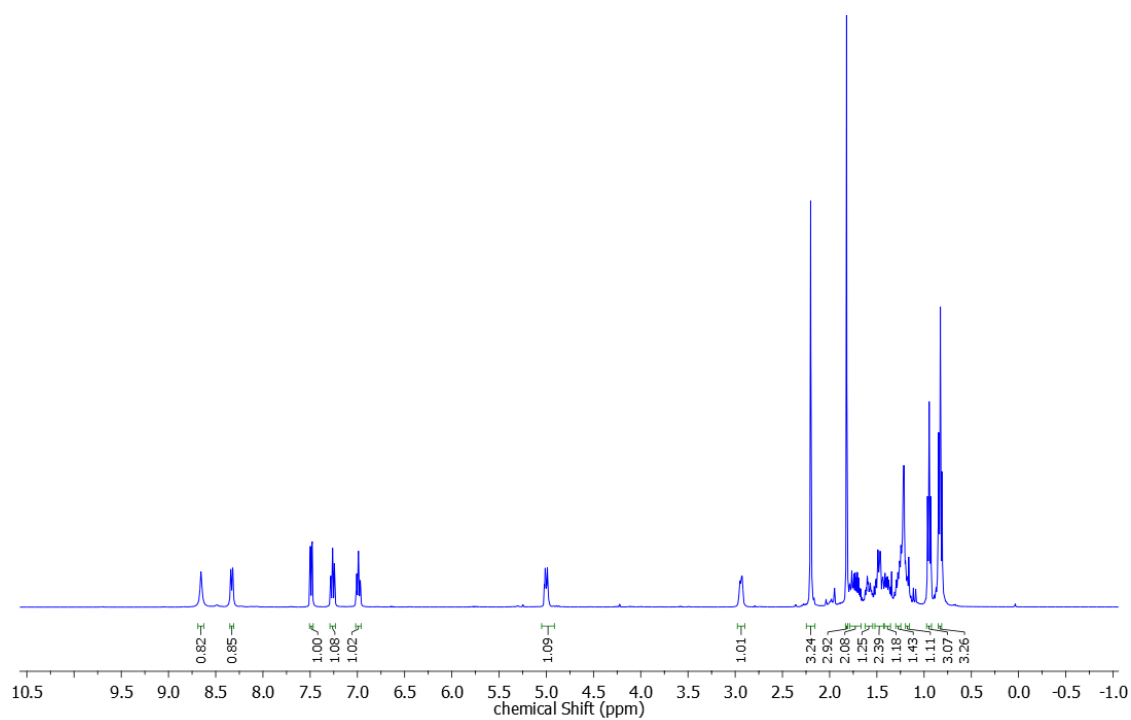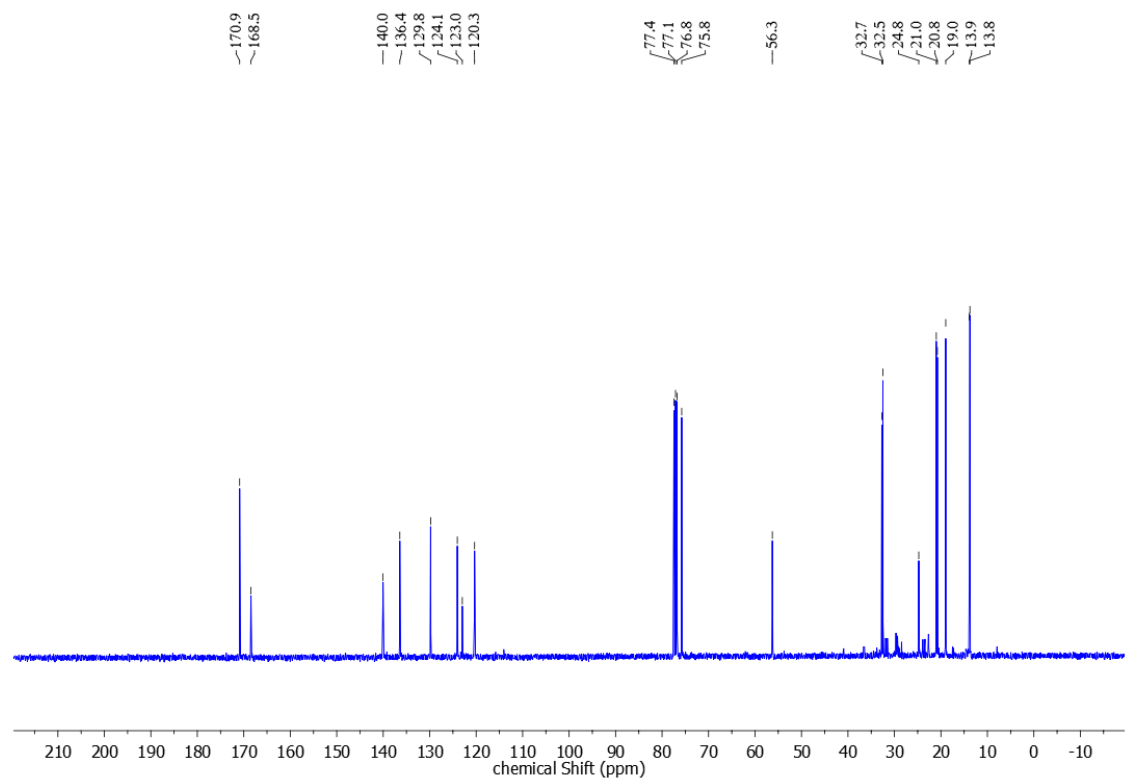

### Spectral data of compound 1j

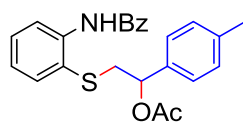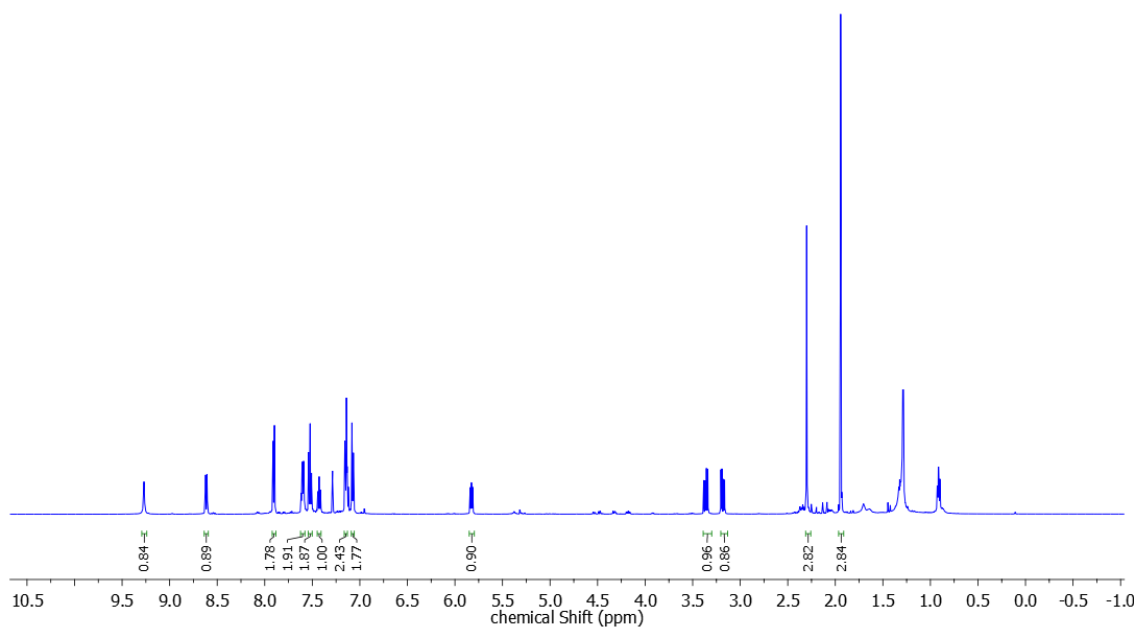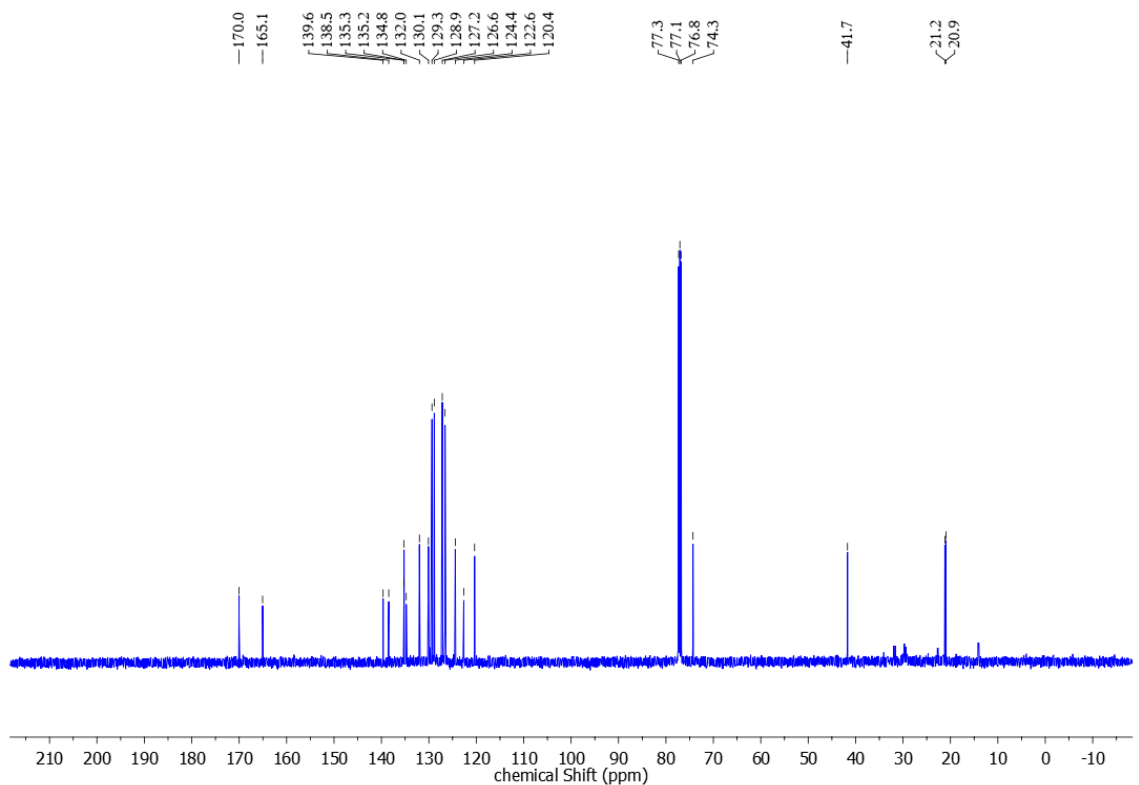

### Spectral data of compound 1k

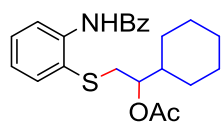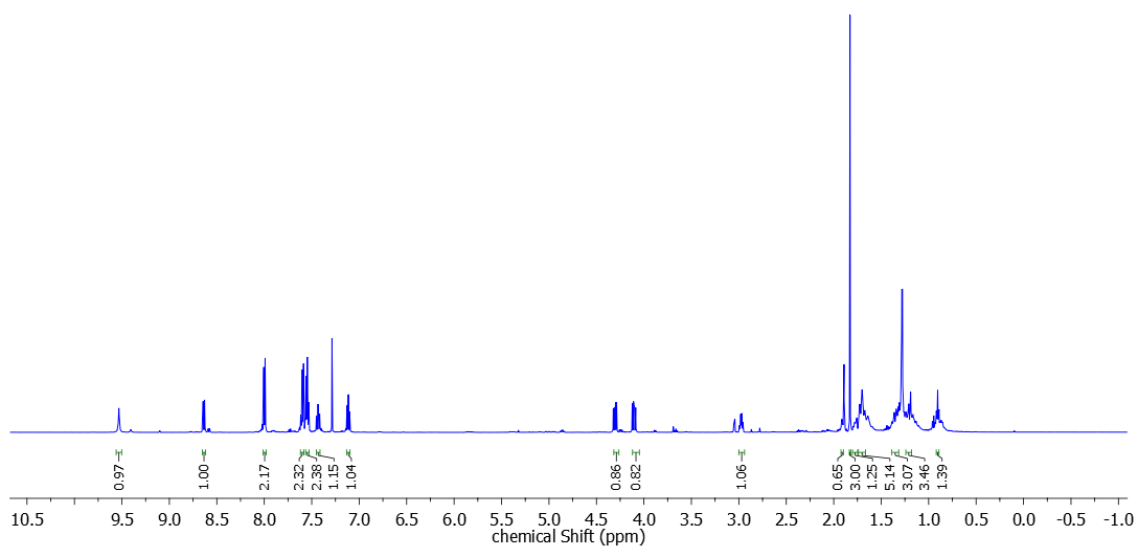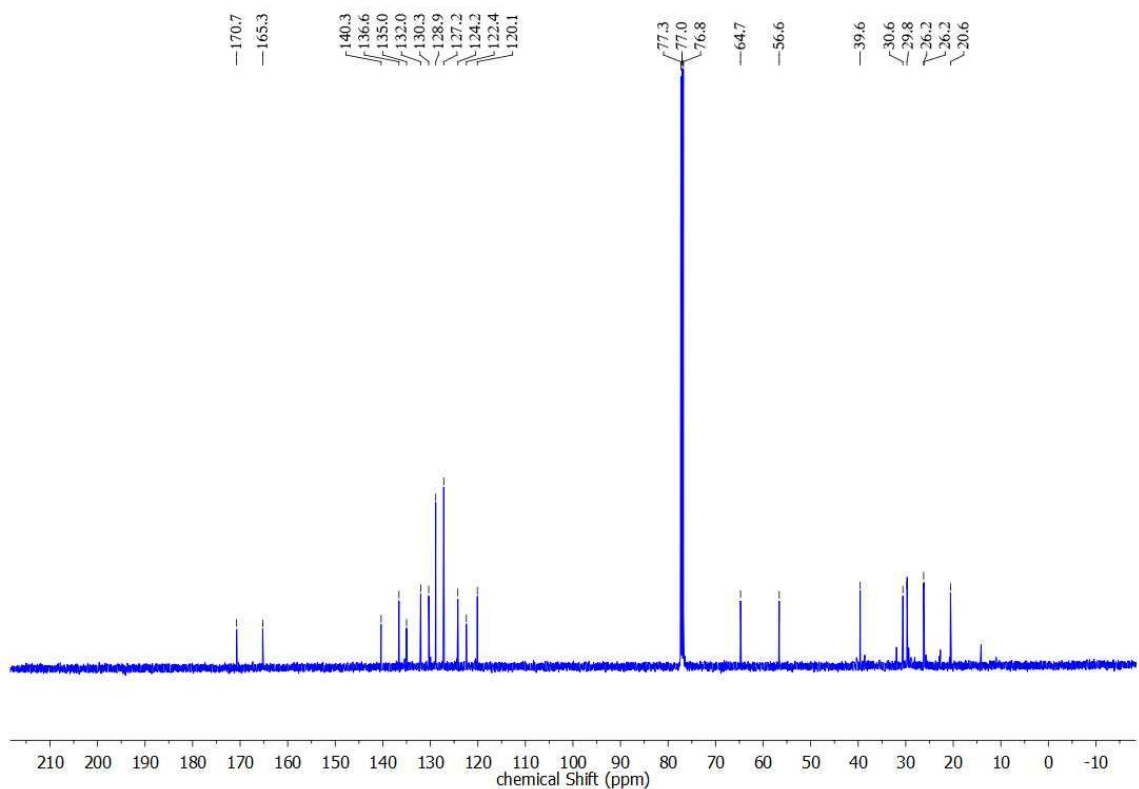

# Spectral data of compound 11

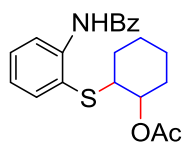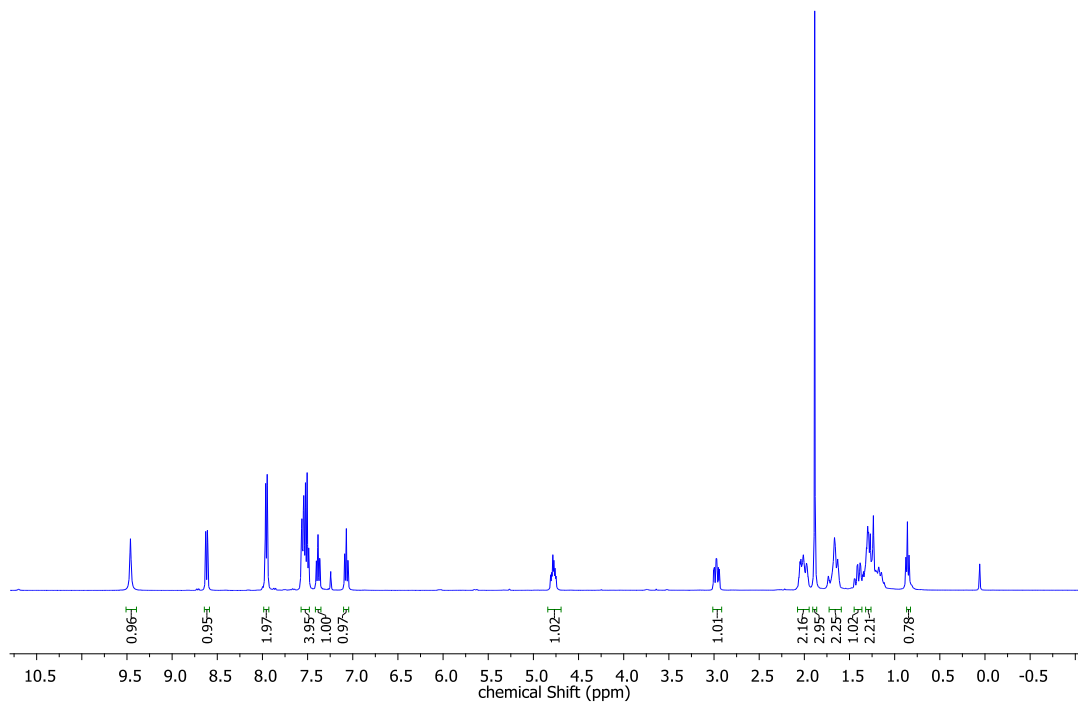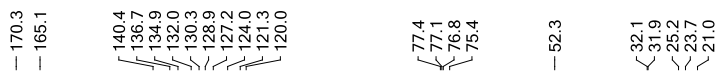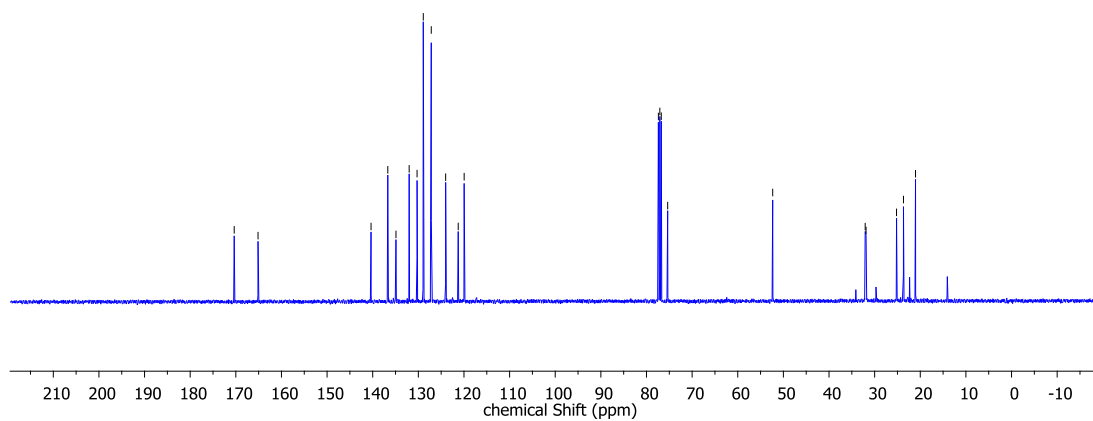

### Spectral data of compound 1m

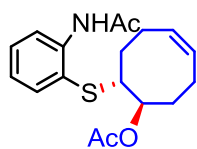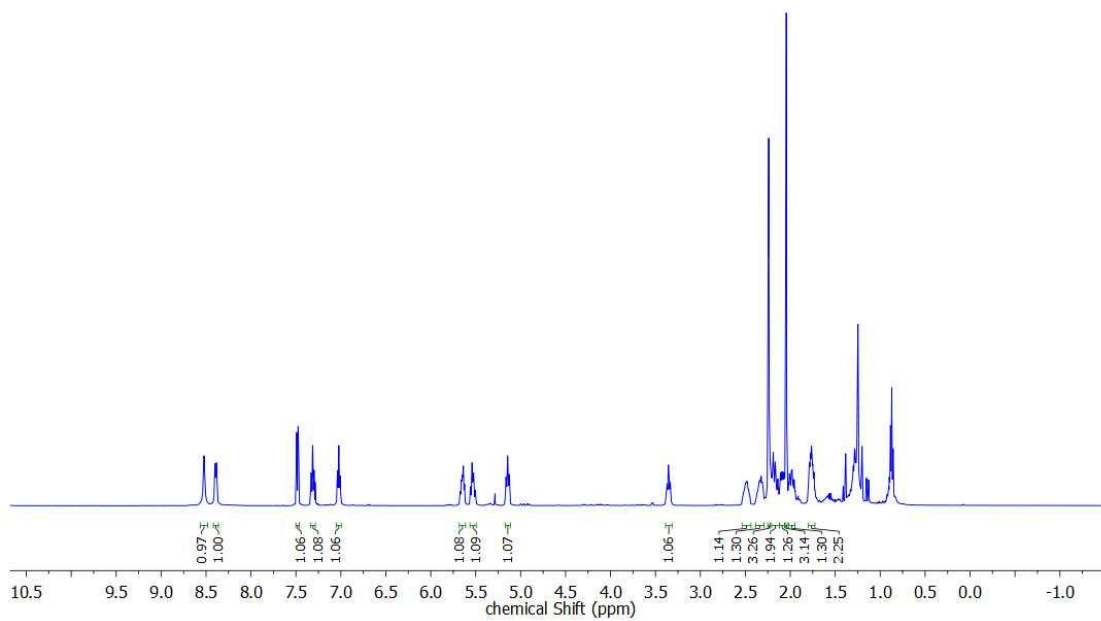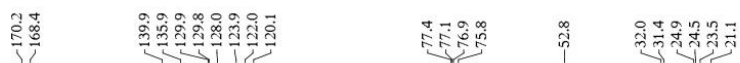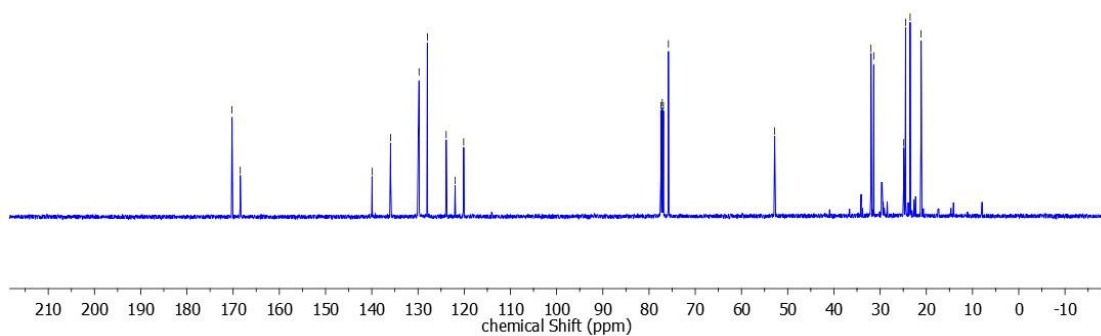

### Spectral data of compound 1n

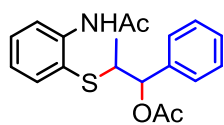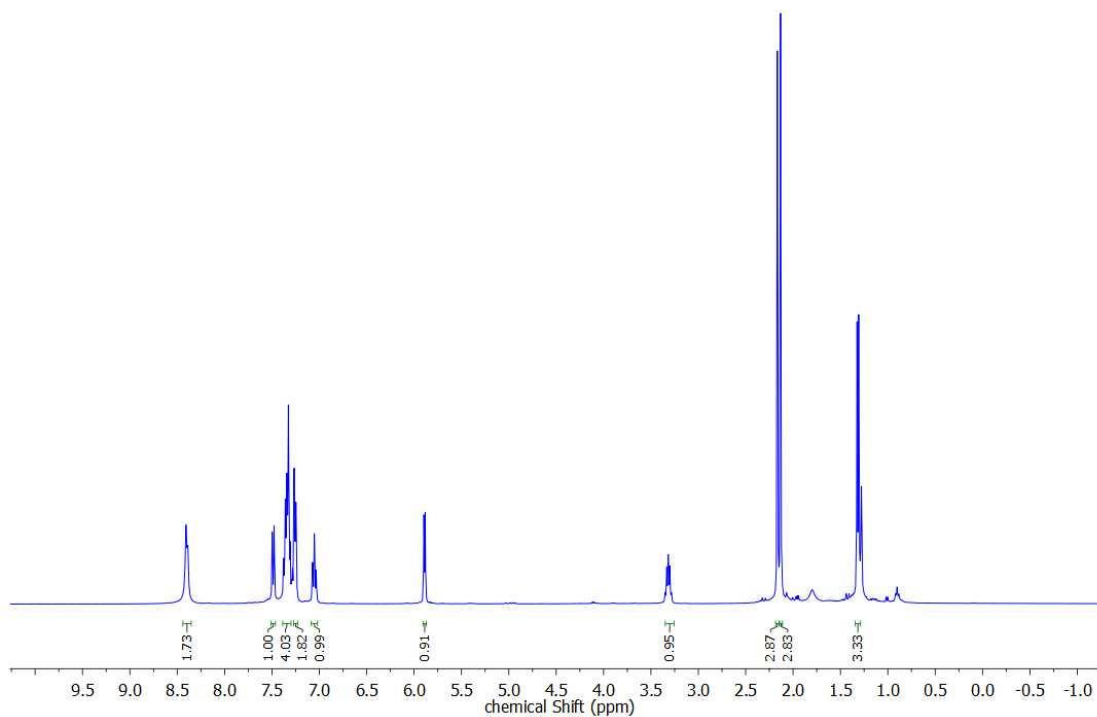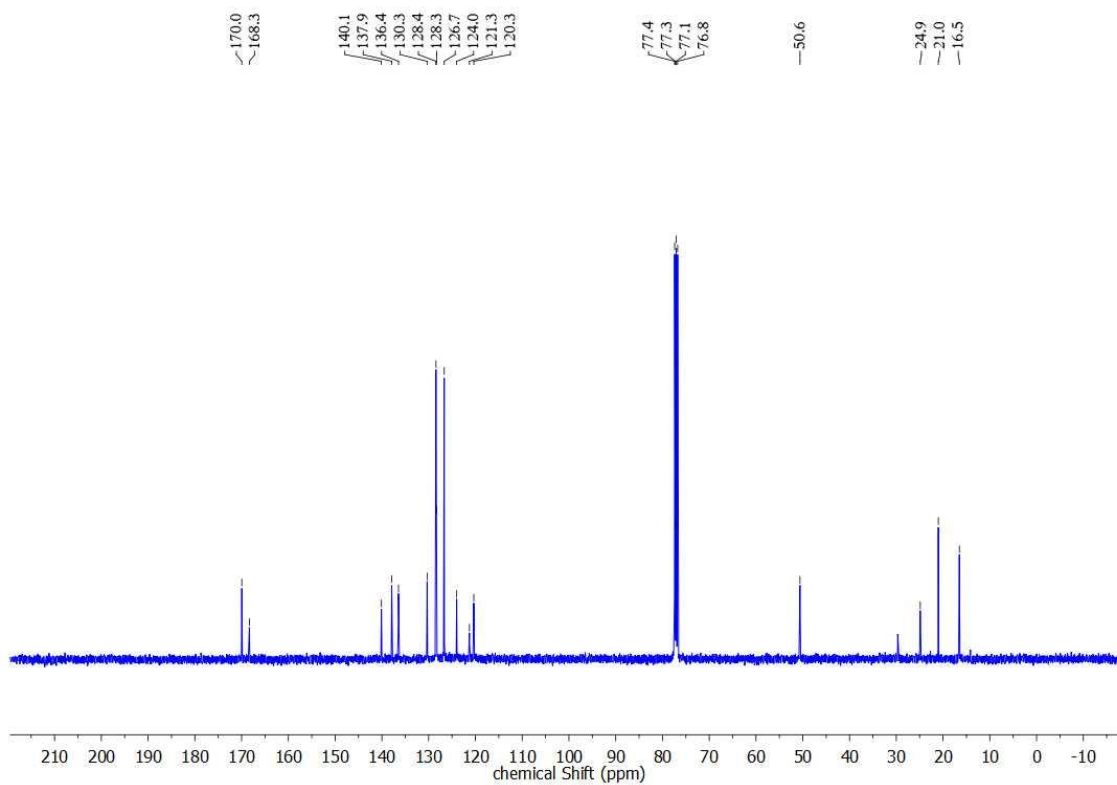

## Spectral data of compound 1o

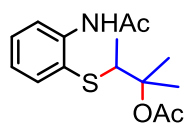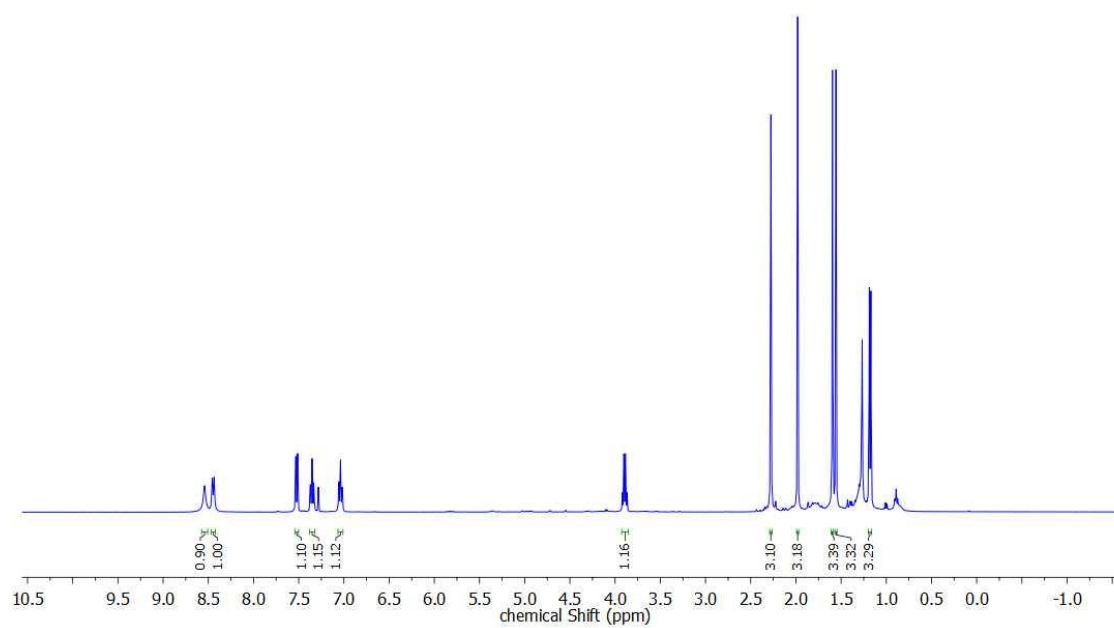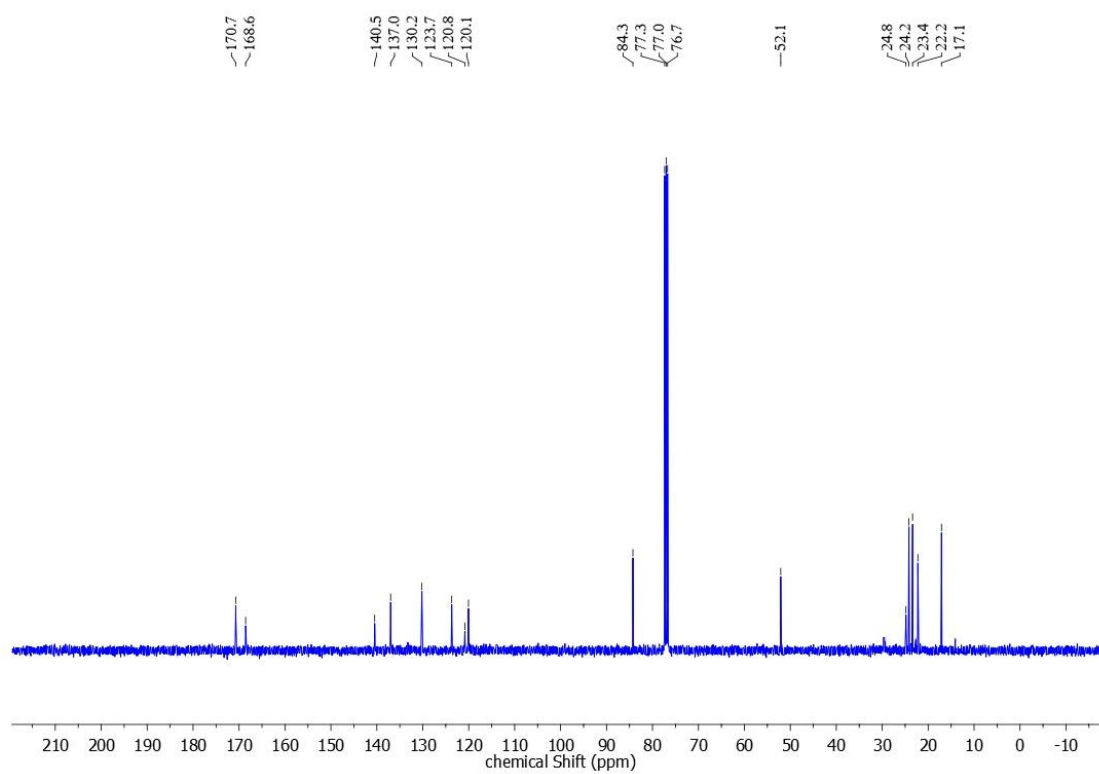



# <sup>1</sup>H-NMR of mixture of isomers

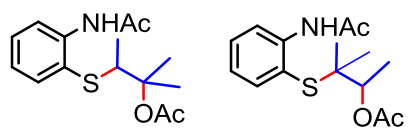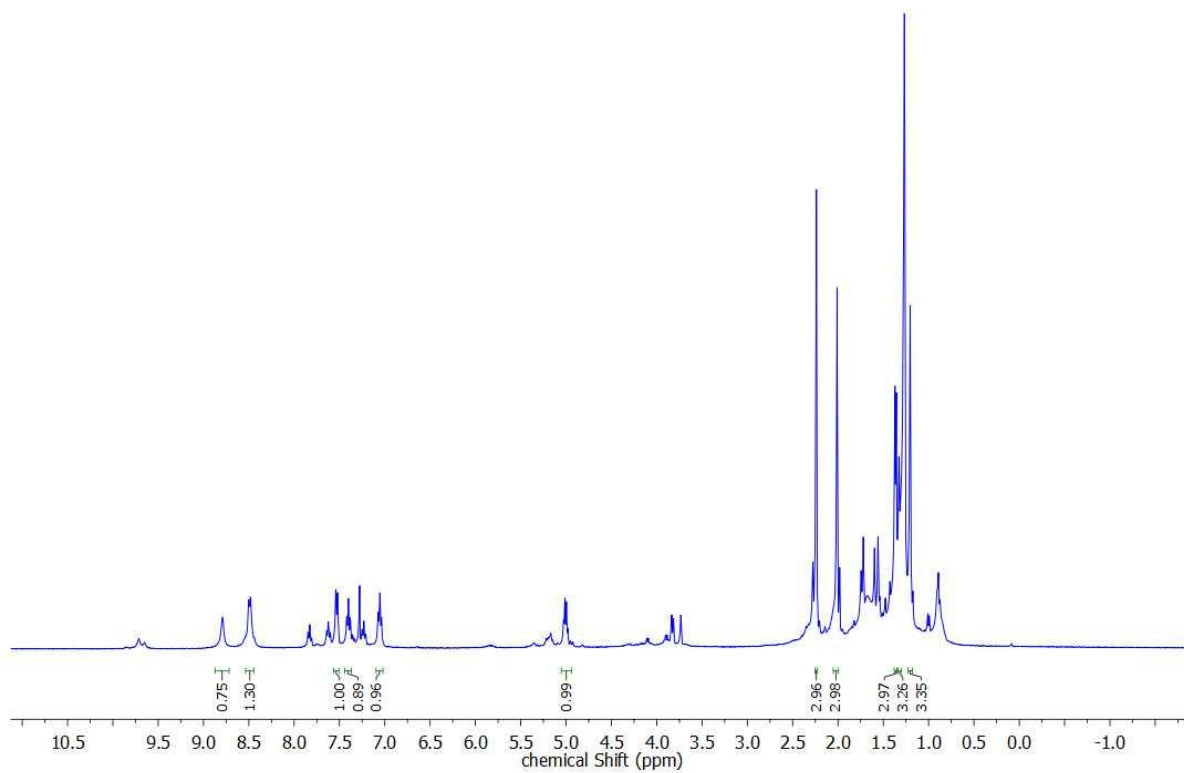

# Spectral data of compound 2a

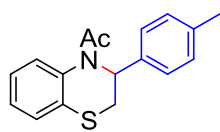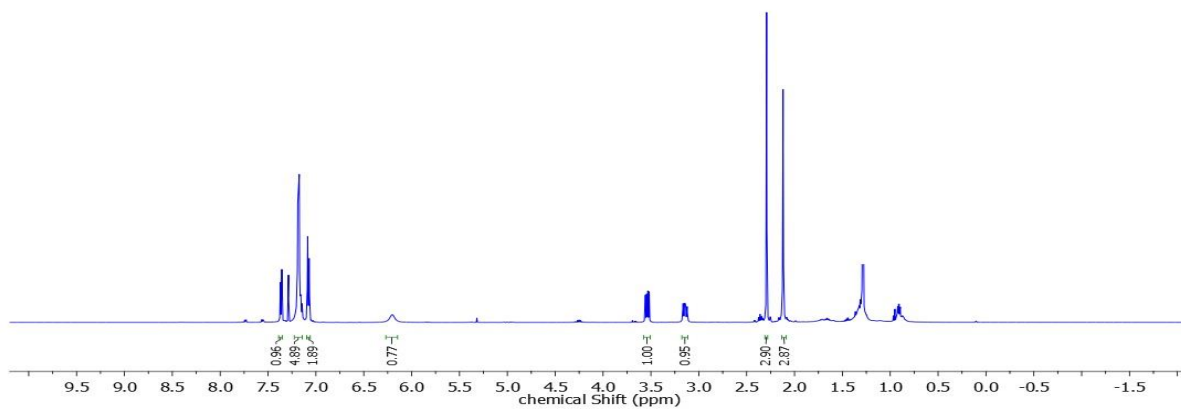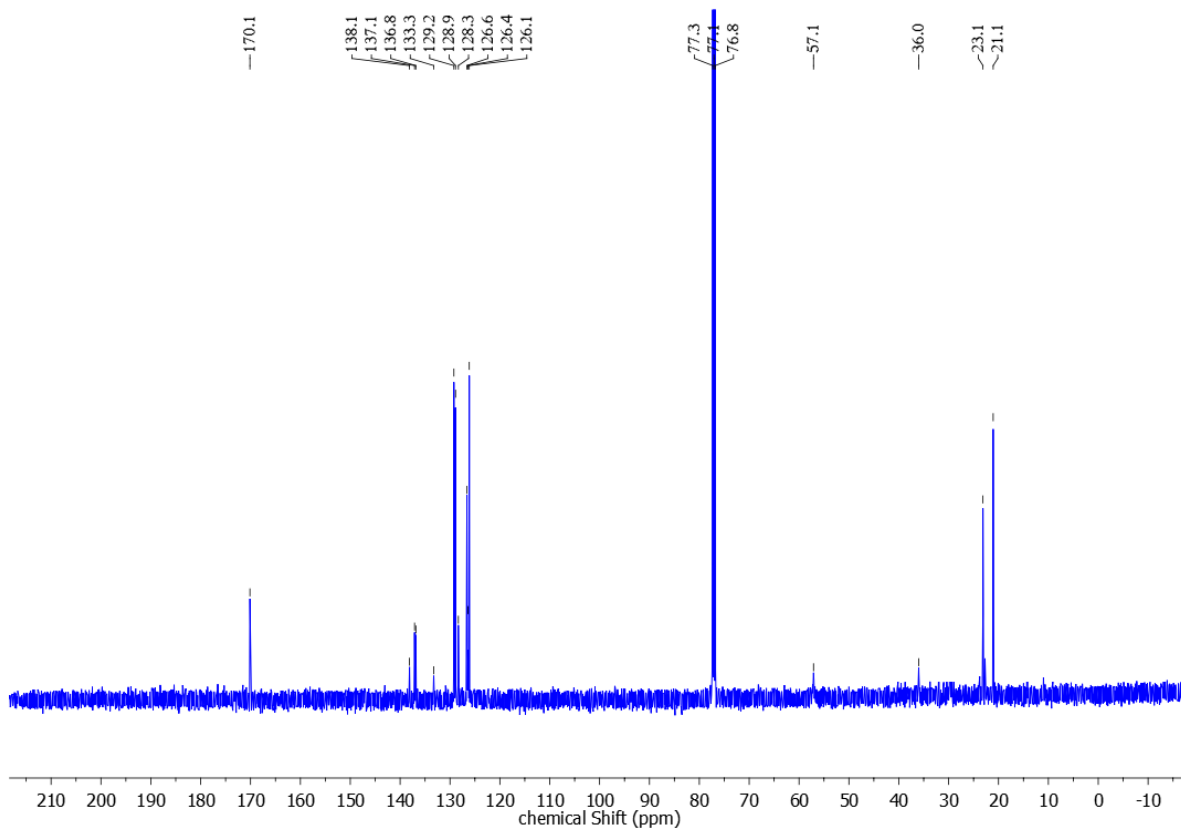

## Spectral data of compound 2b

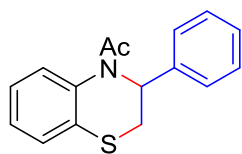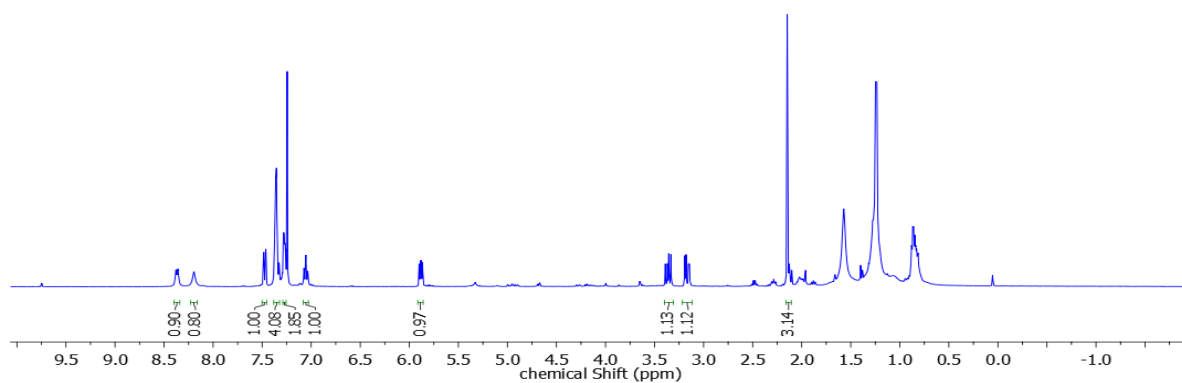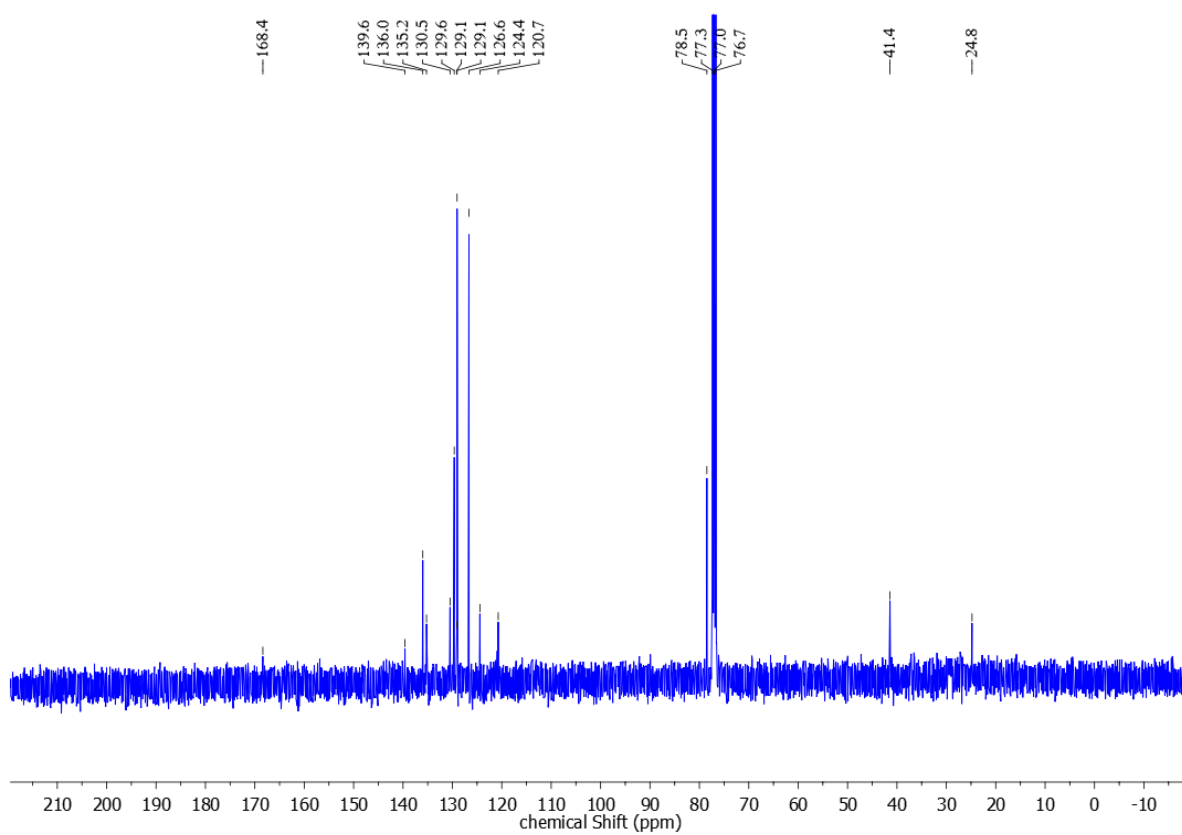

### Spectral data of compound 2c

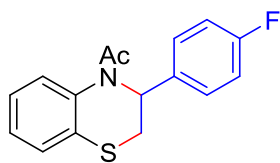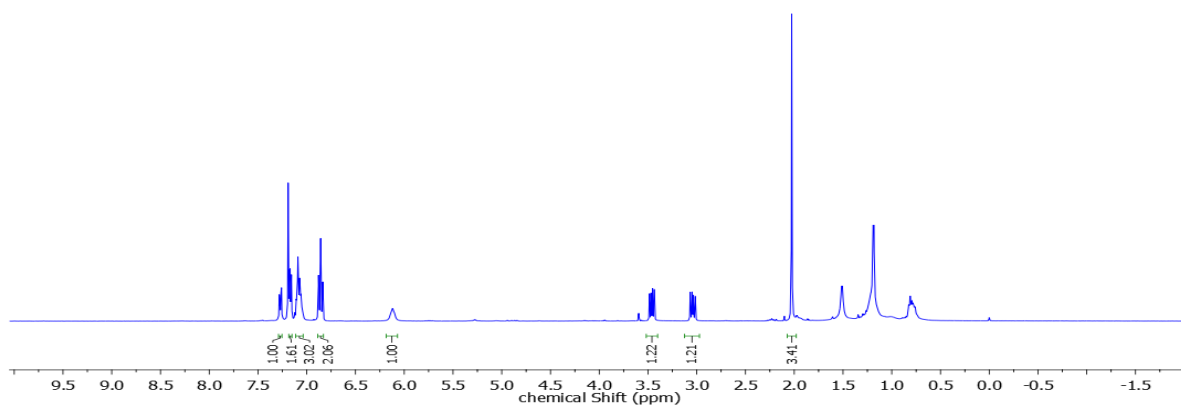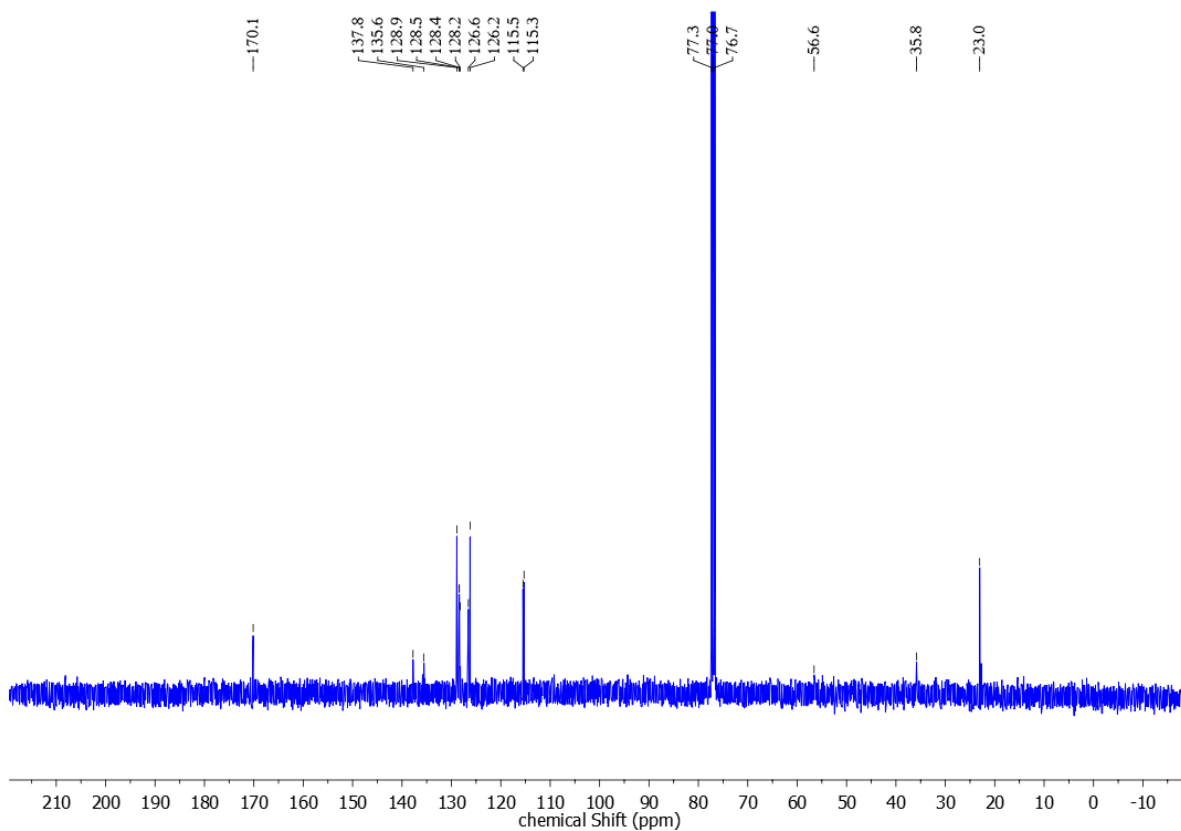

# Spectral data of compound 2d

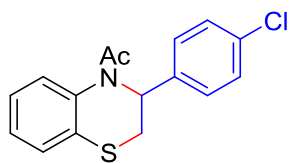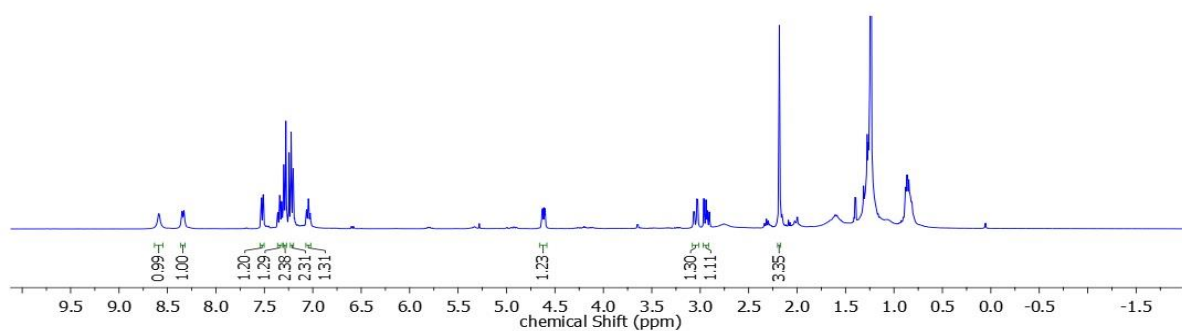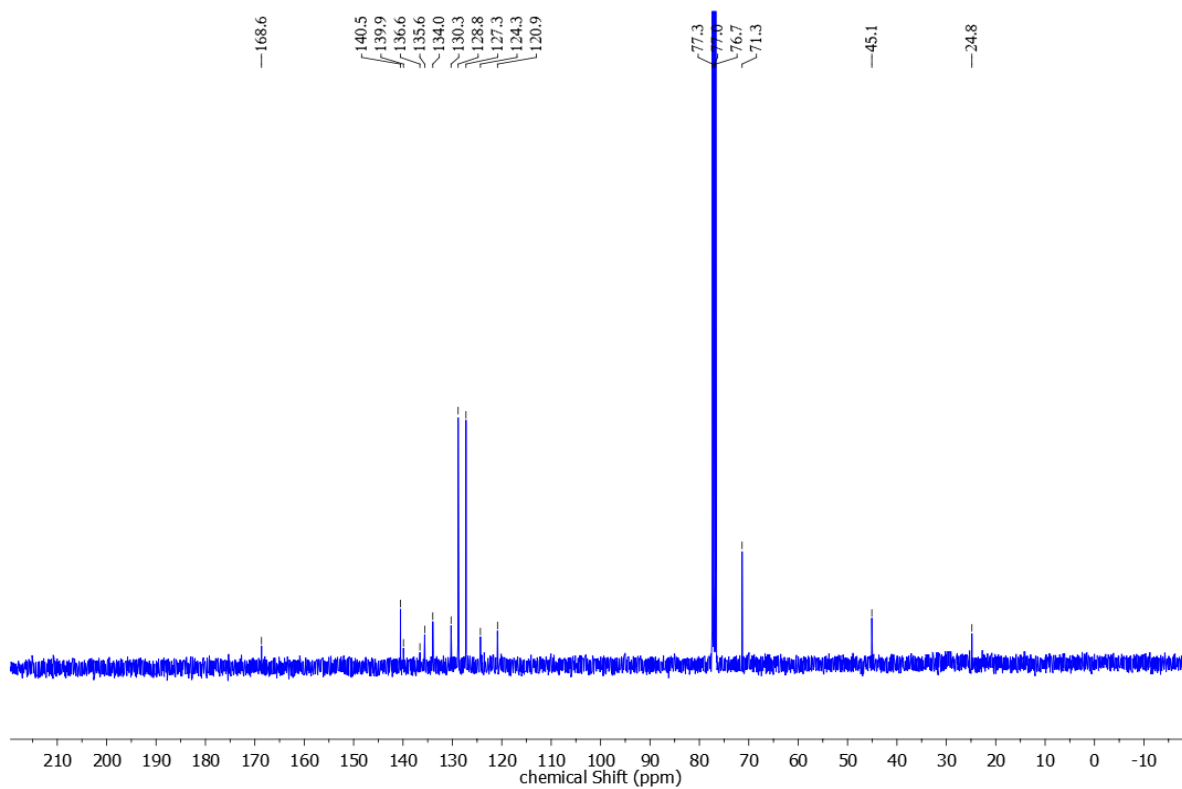

# Spectral data of compound 2e

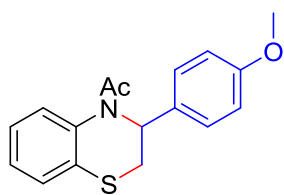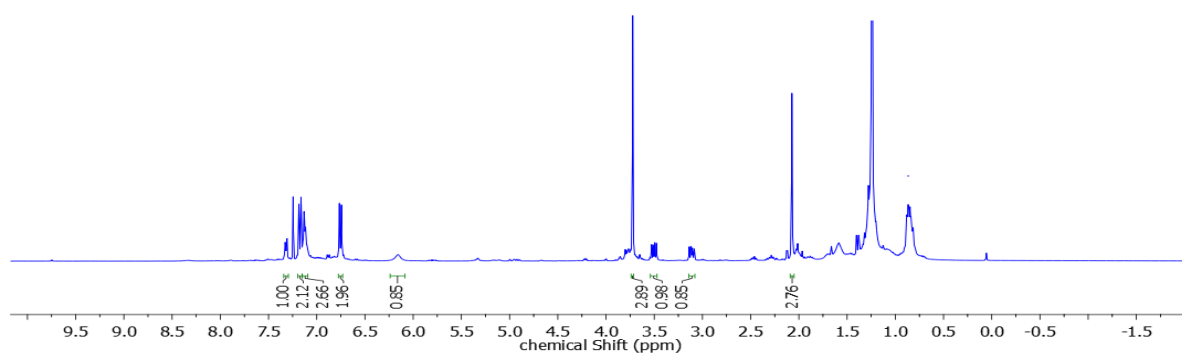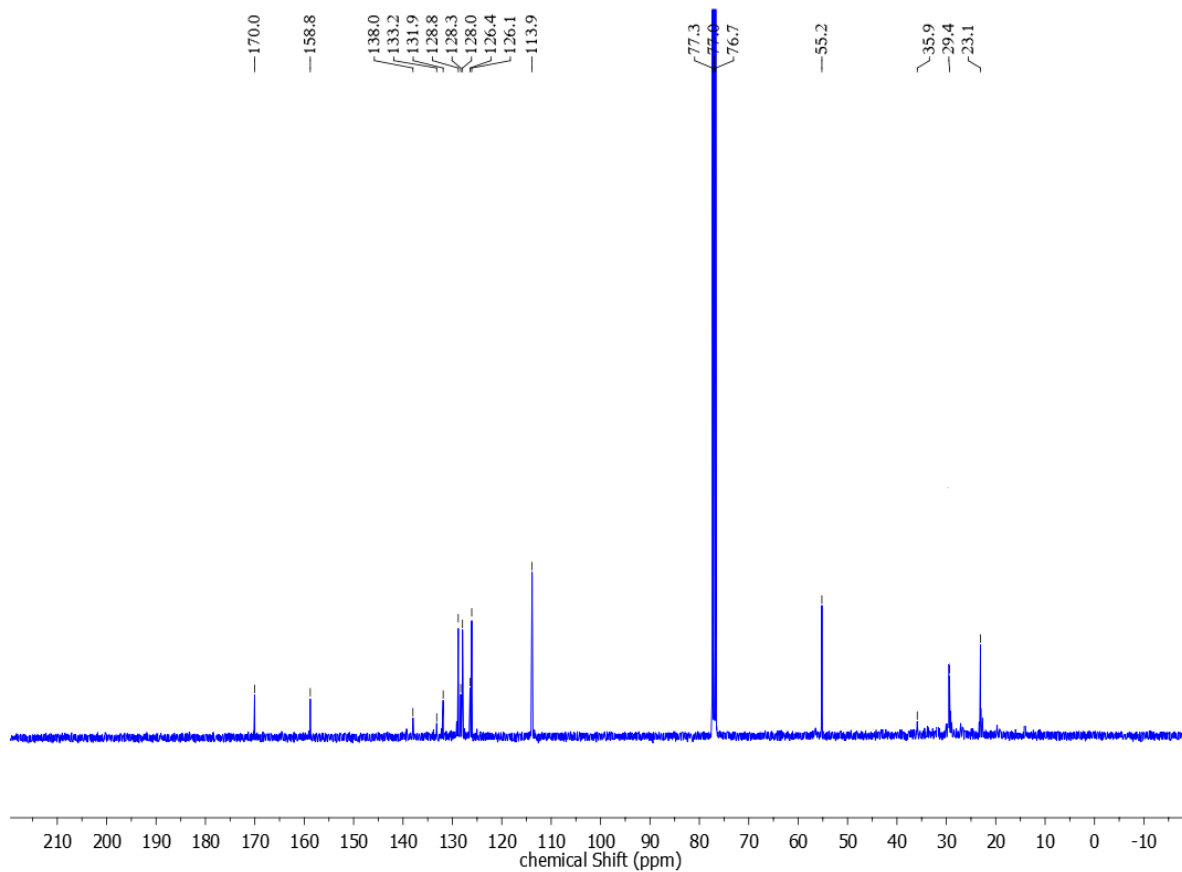

## Spectral data of compound 2f

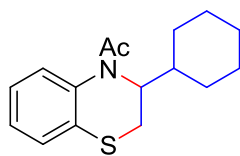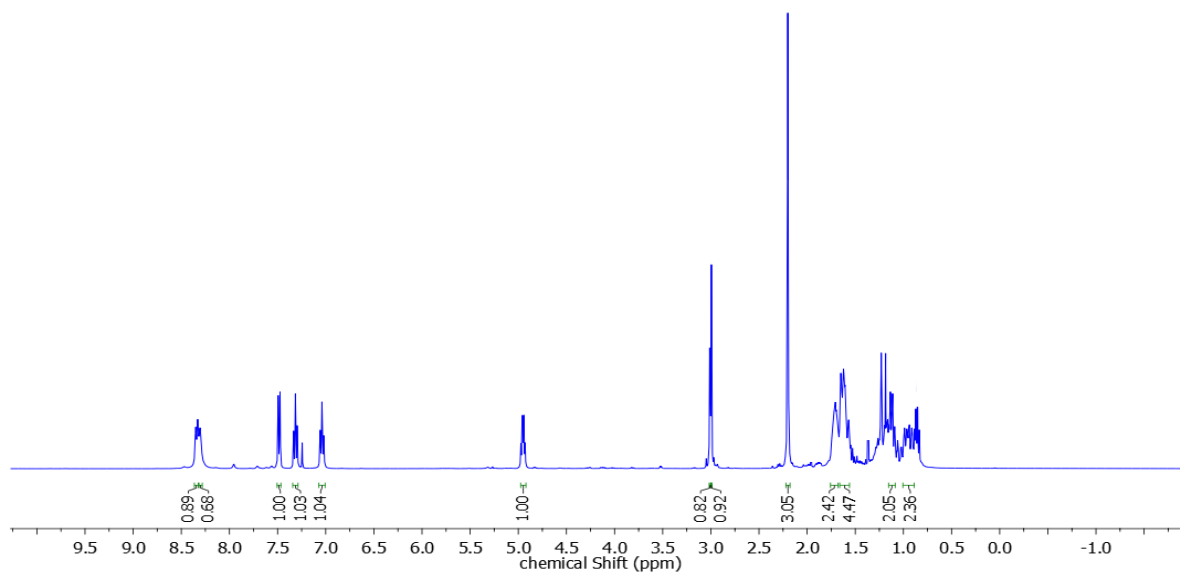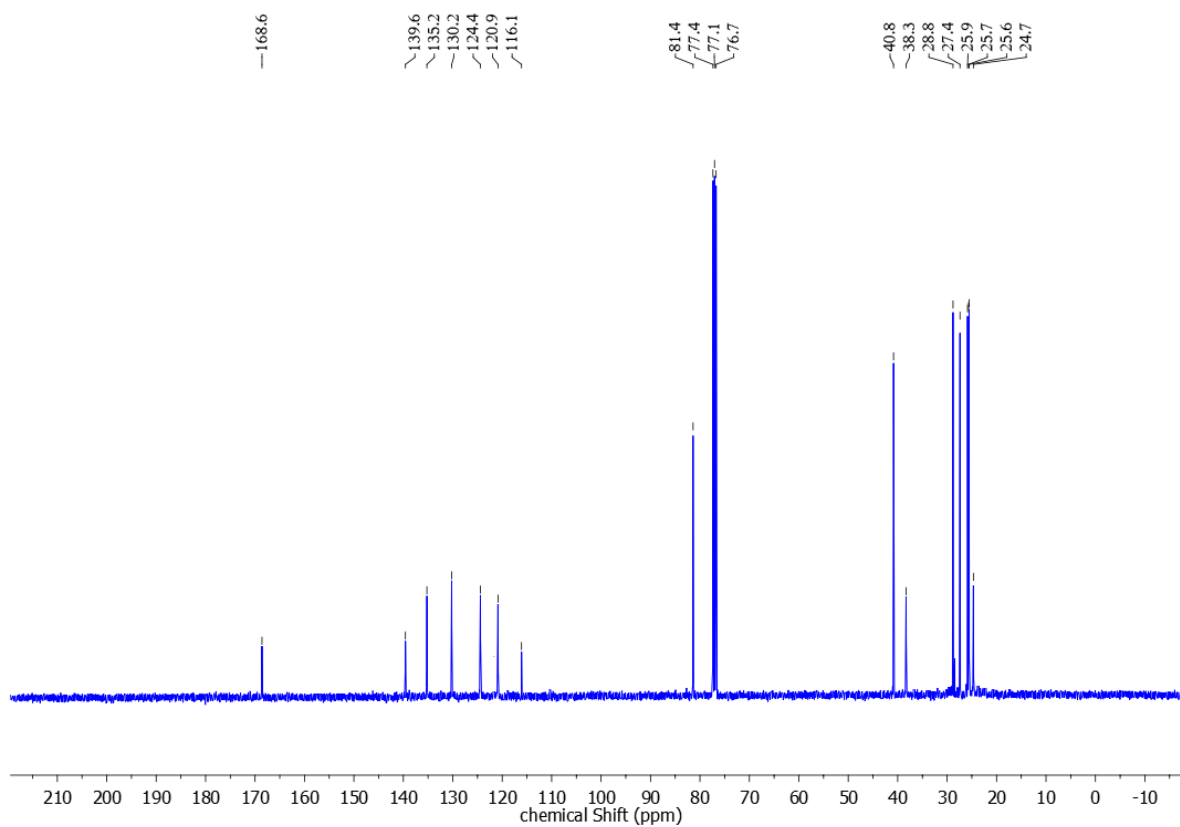

# Spectral data of compound 2g

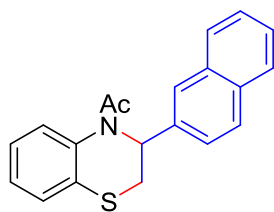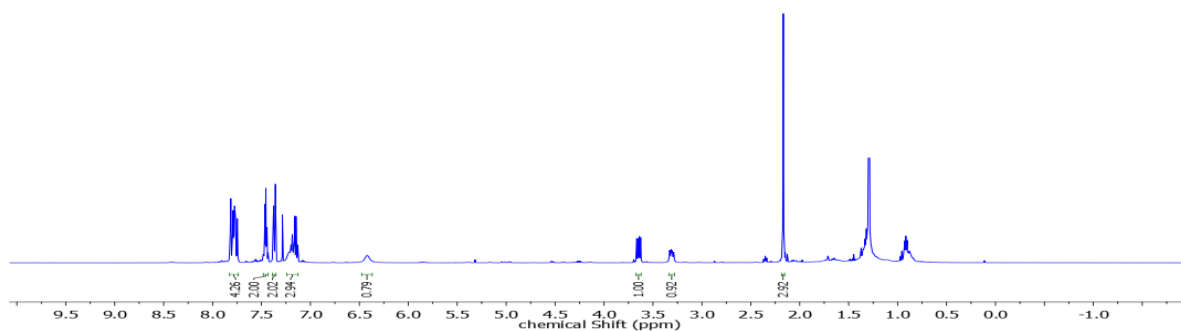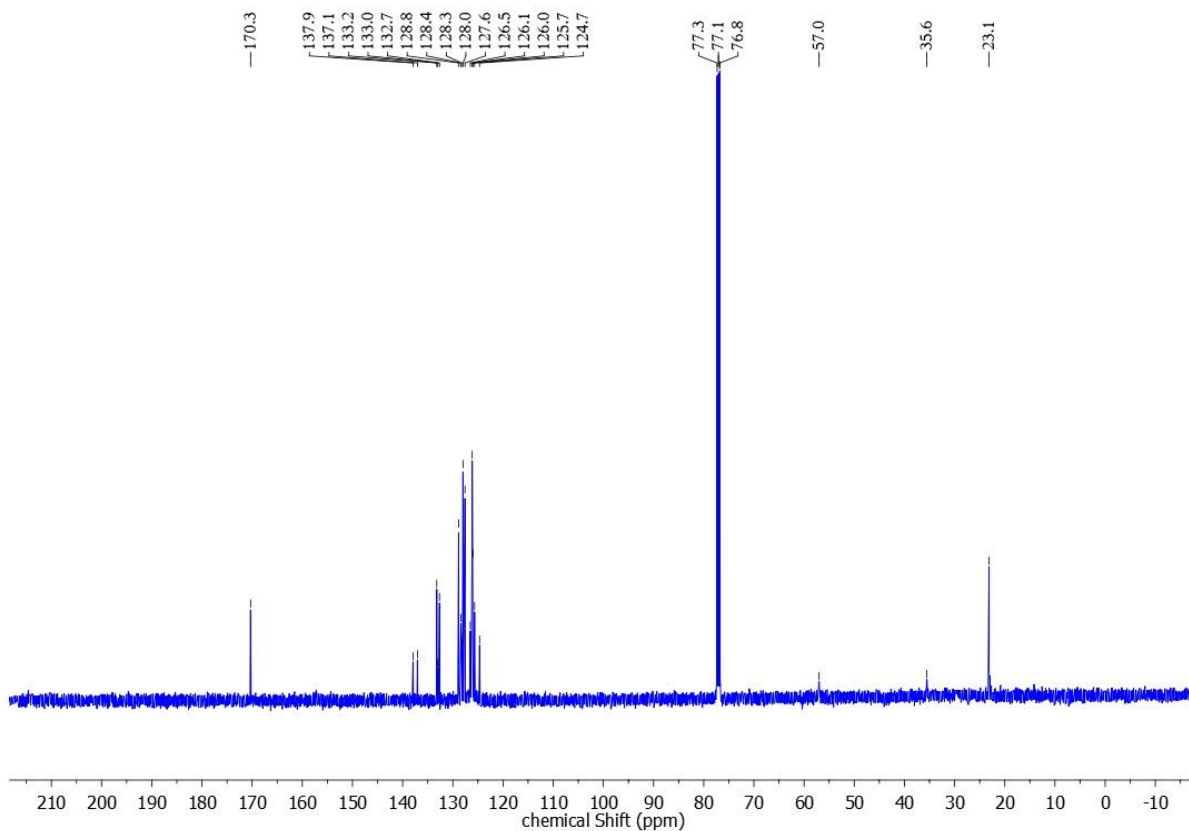



## Spectral data of compound 2h

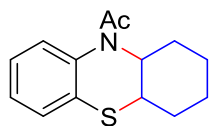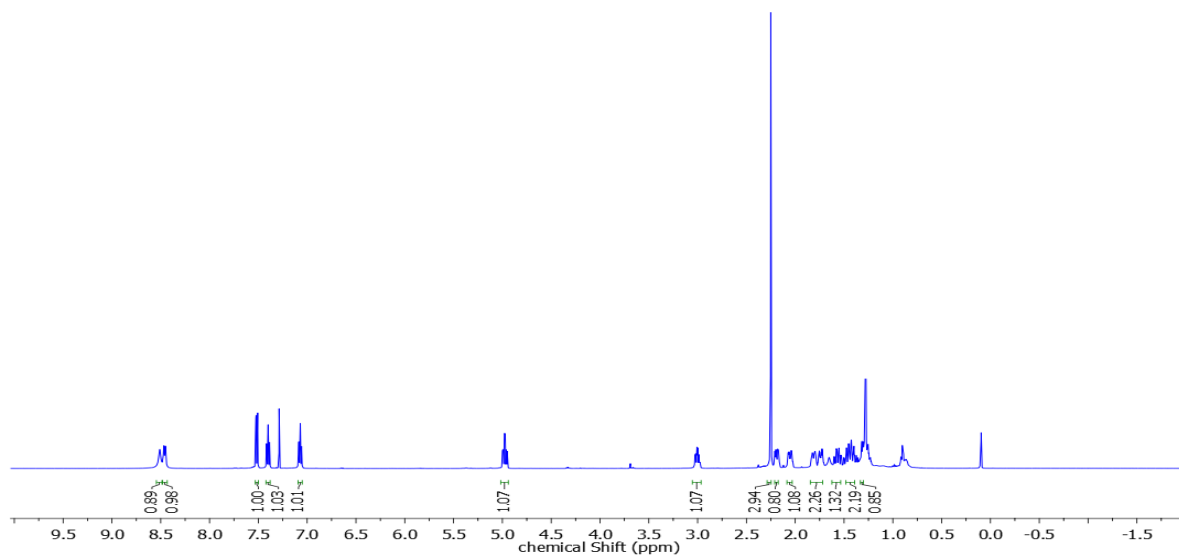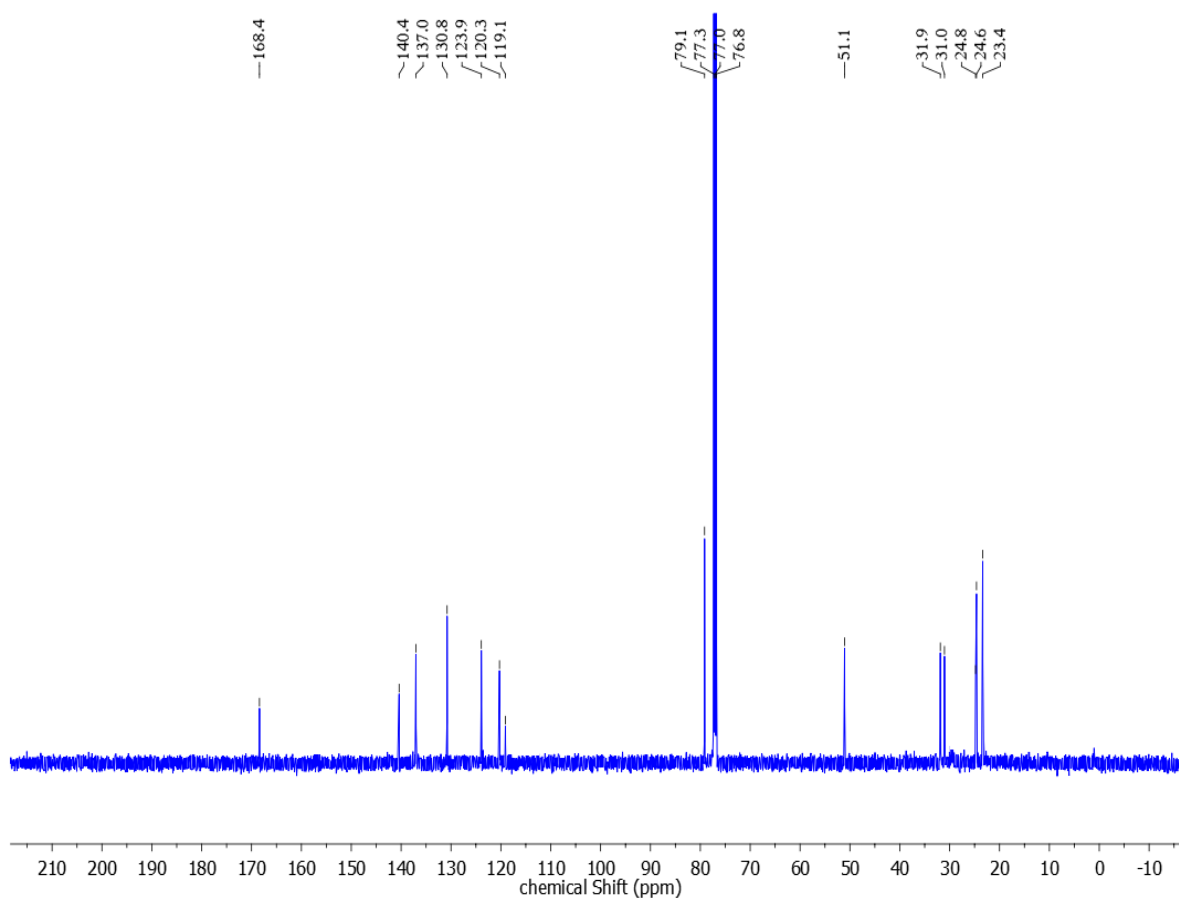

## Spectral data of compound 2i

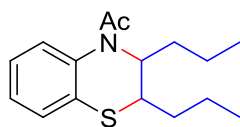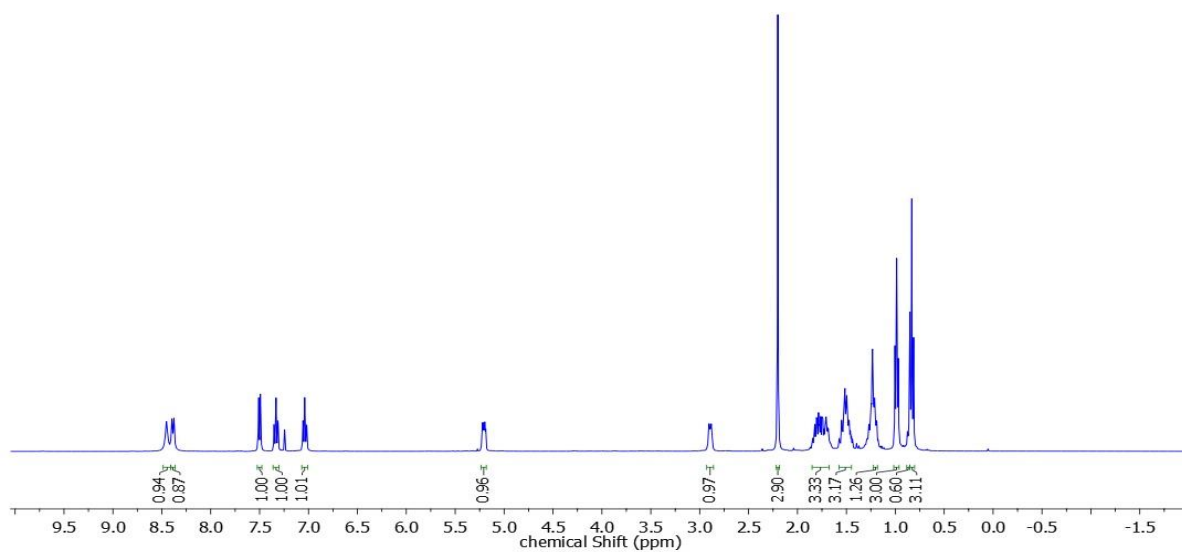

Chemical Shift (ppm): 168.4, 140.0, 136.3, 130.4, 124.2, 120.5, 116.1, 80.3, 77.4, 77.0, 76.7, 54.9, 33.4, 31.2, 24.7, 21.0, 18.8, 15.9, 13.5

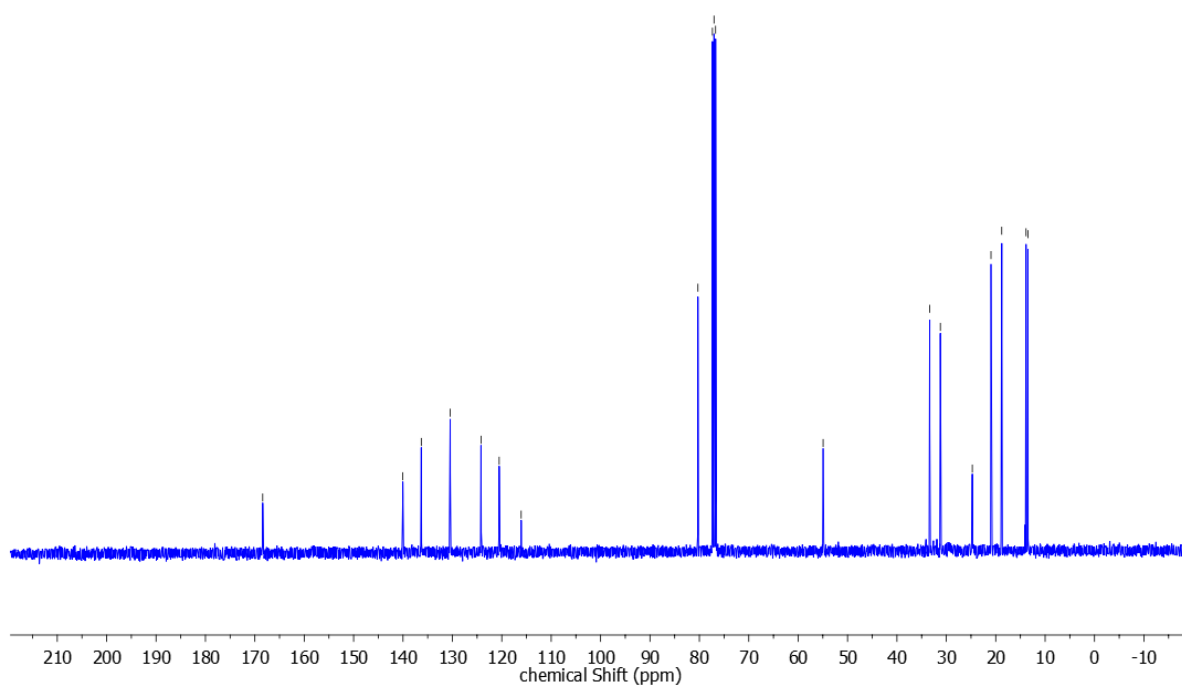

# Spectral data of compound 2j

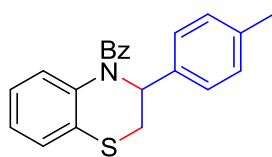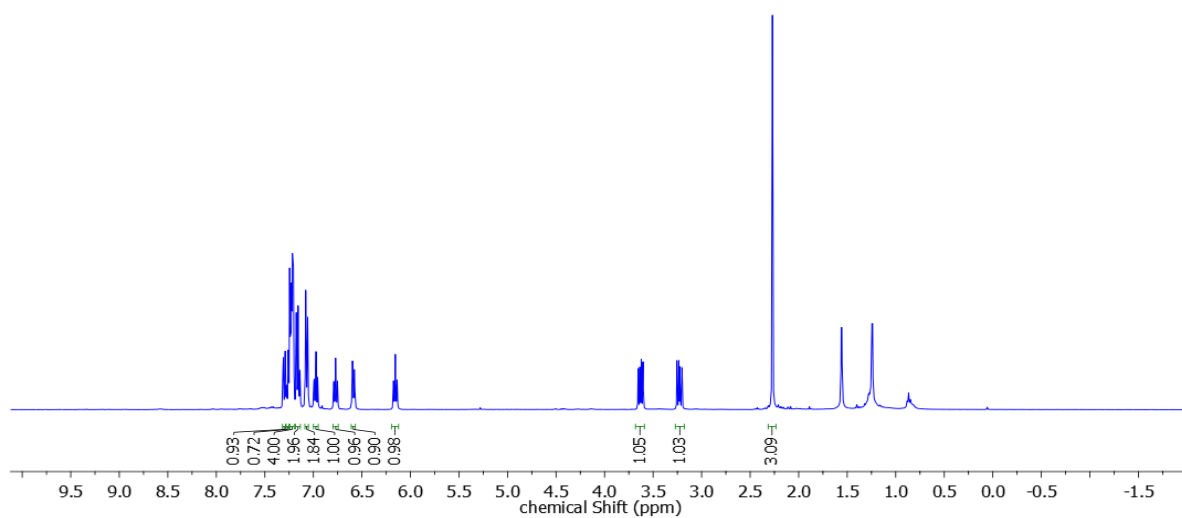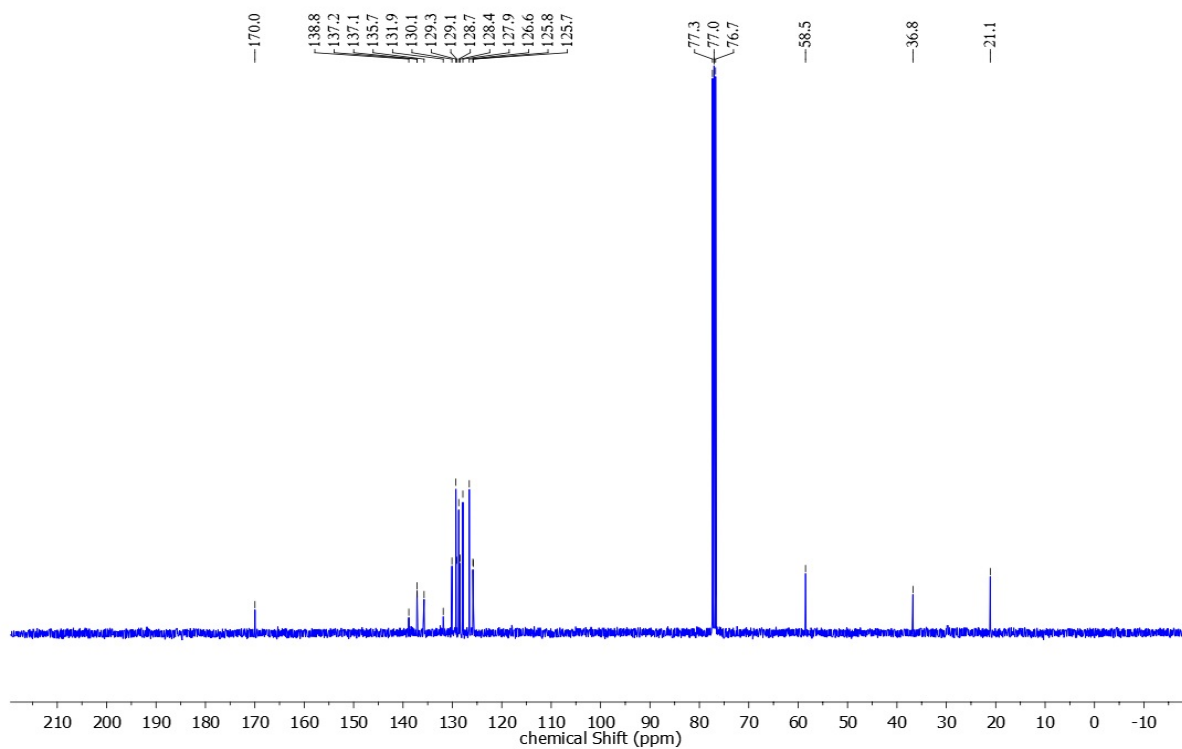

### Spectral data of compound 2k

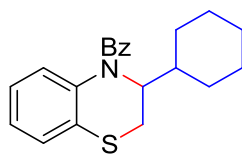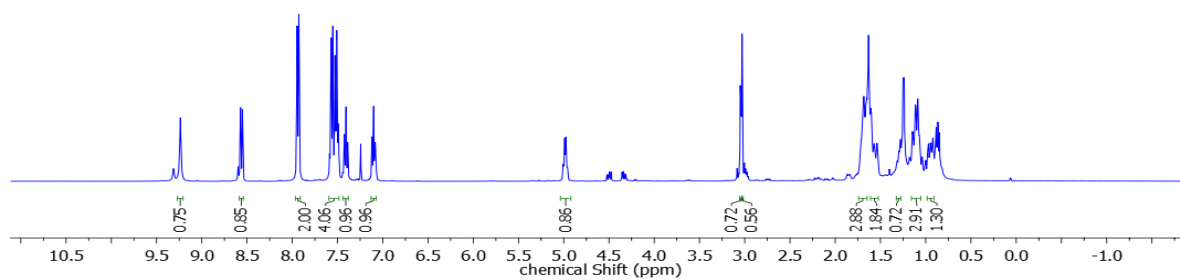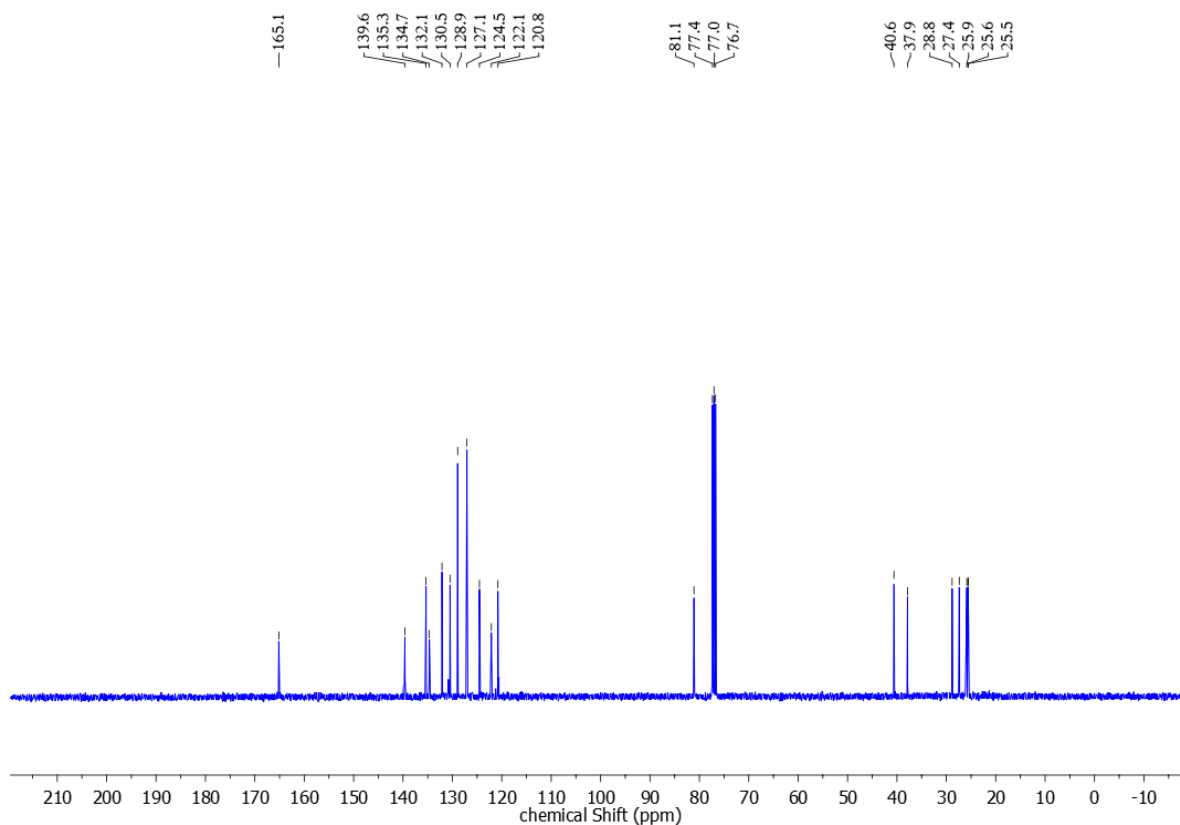

### Spectral data of compound 21

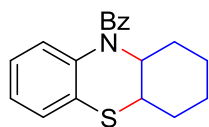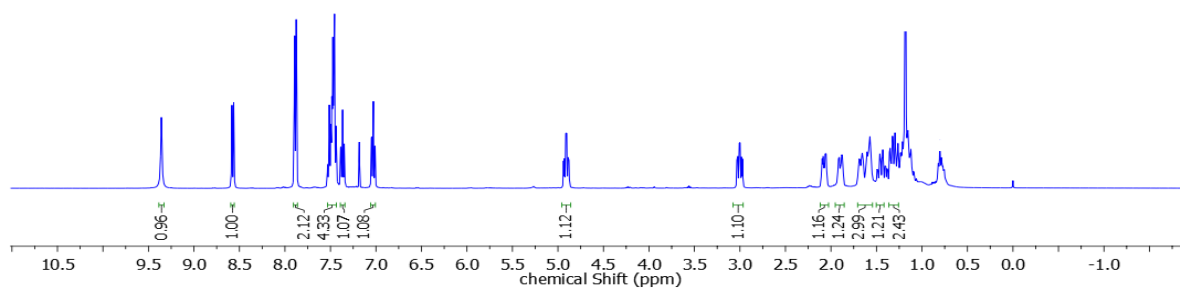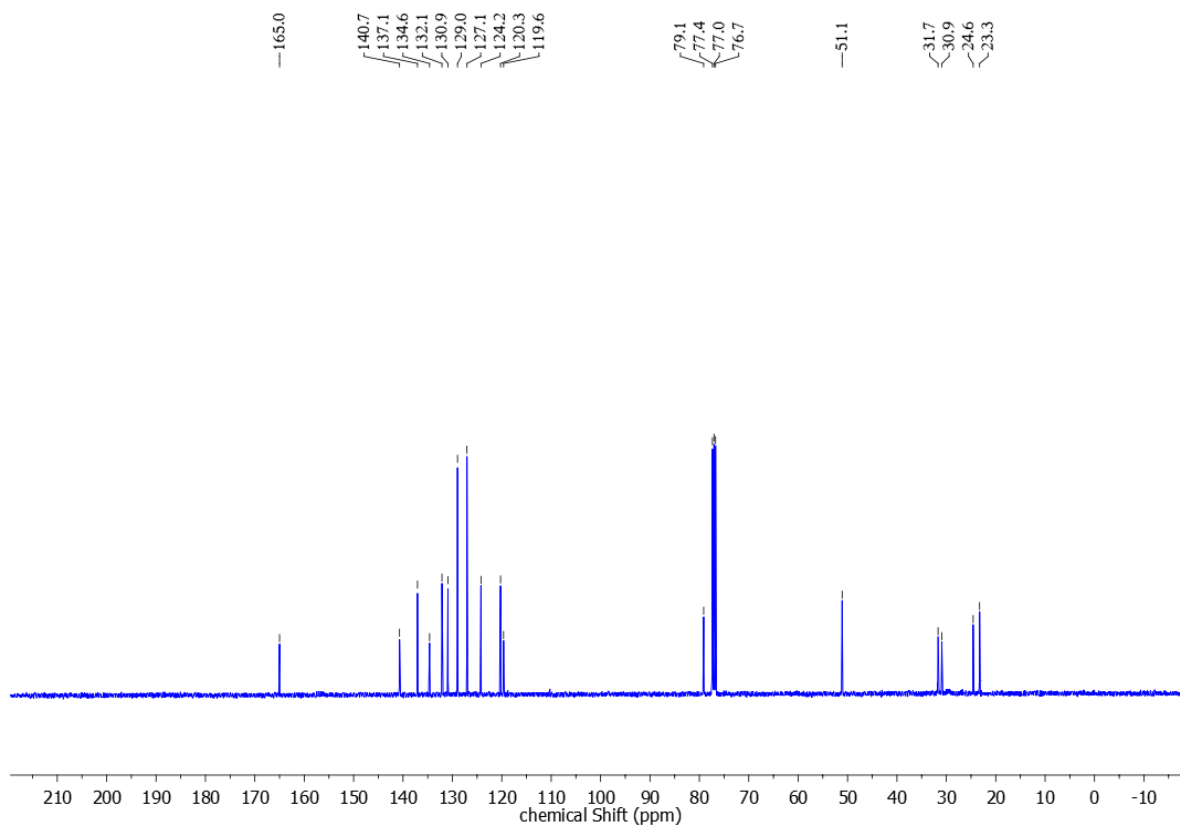

# Spectral data of compound 2m

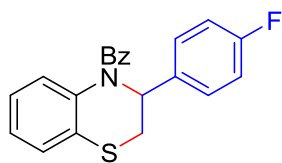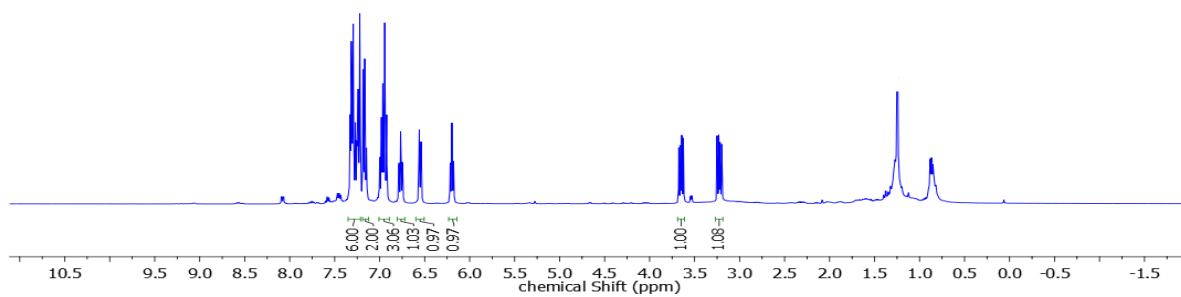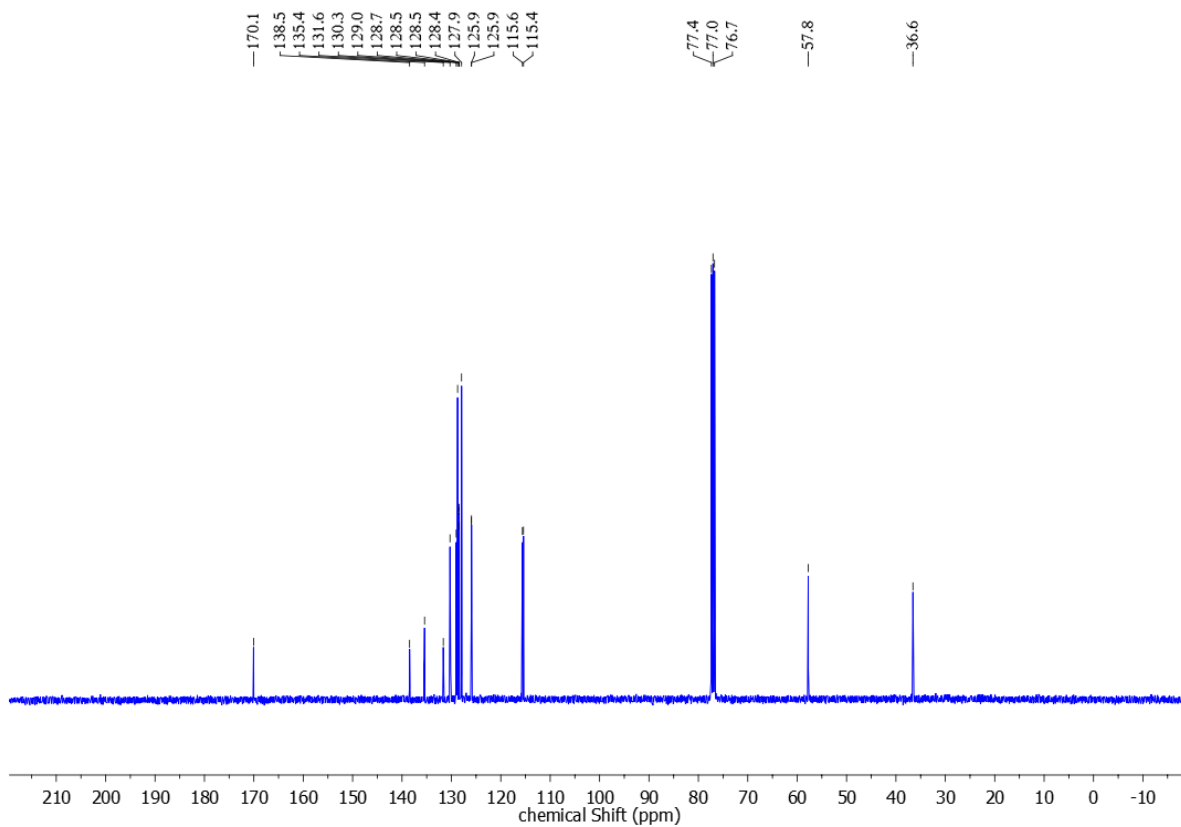

### Spectral data of compound 2n

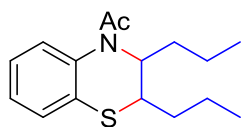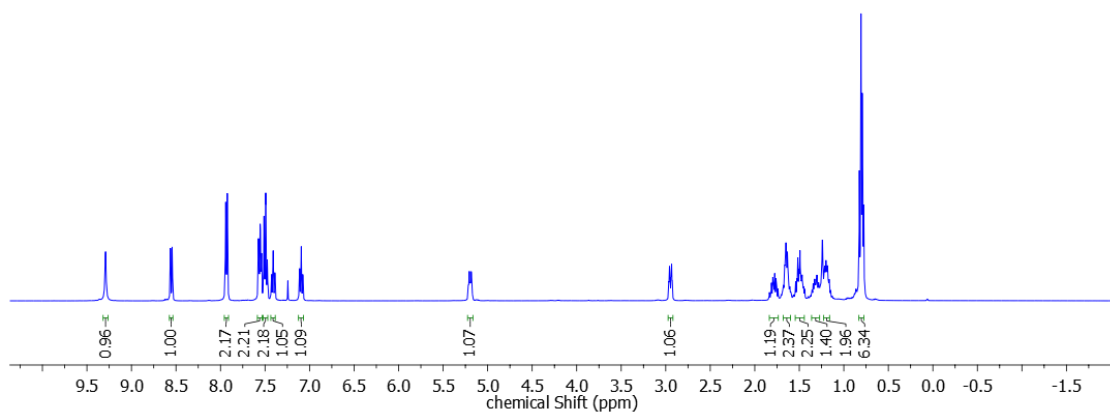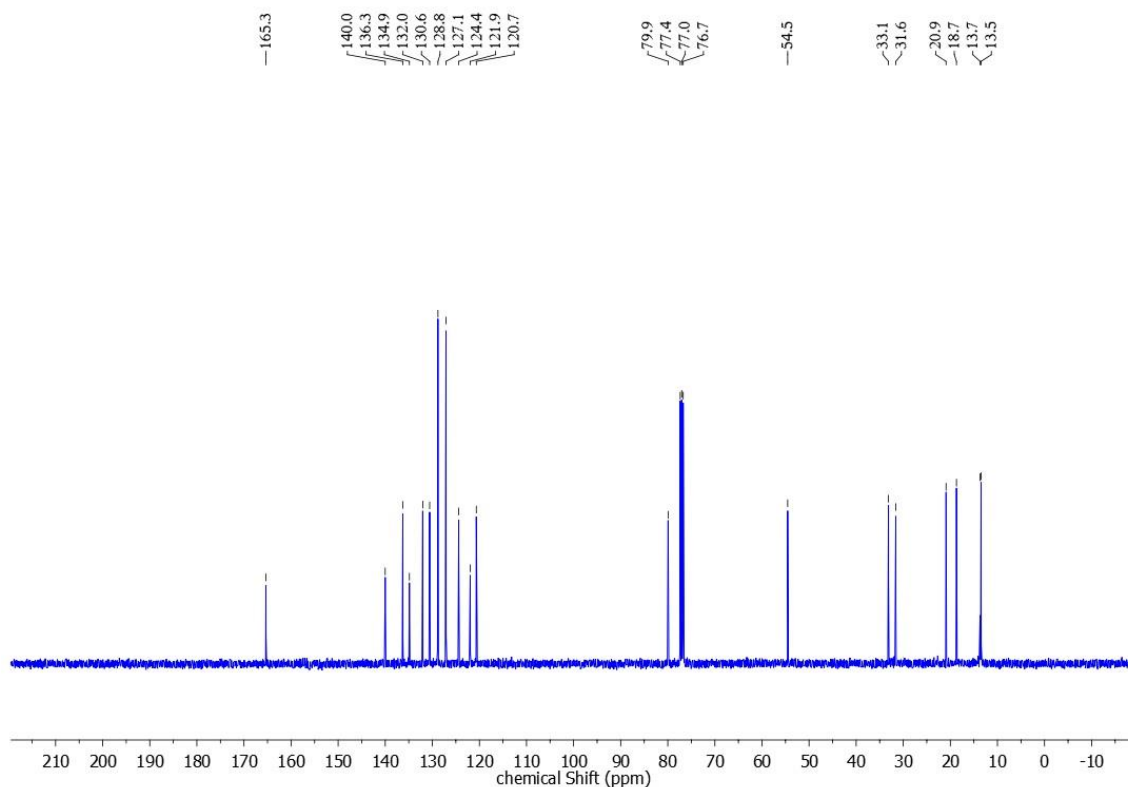

### Spectral data of the inseparable mixture from 1m:

Probable compound:

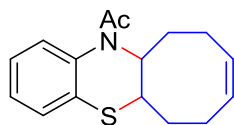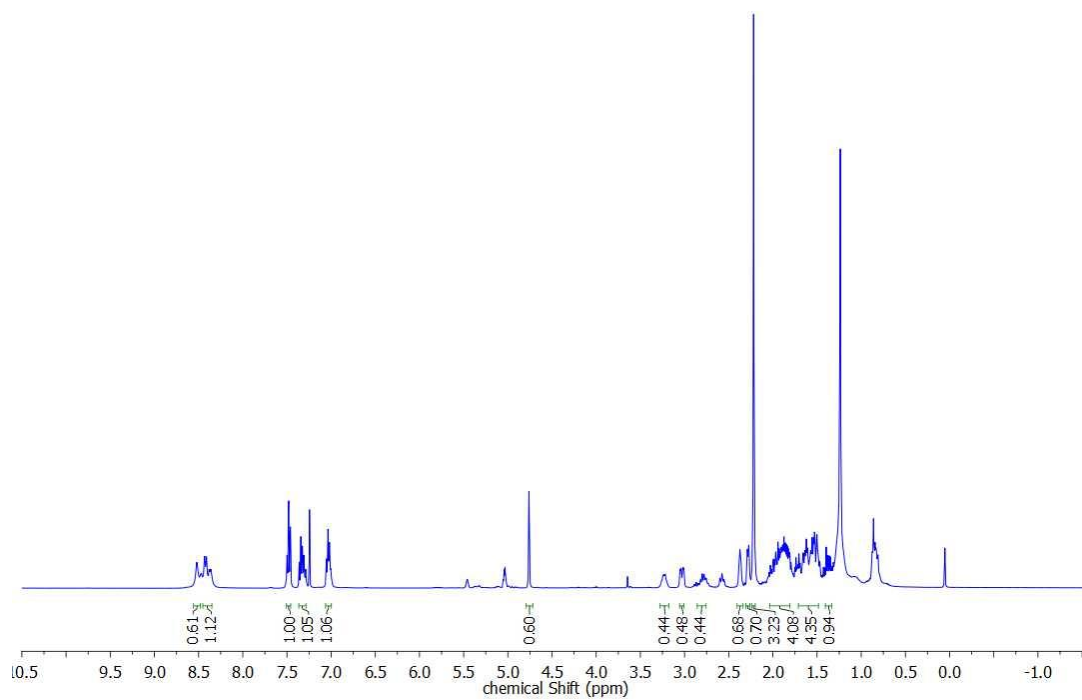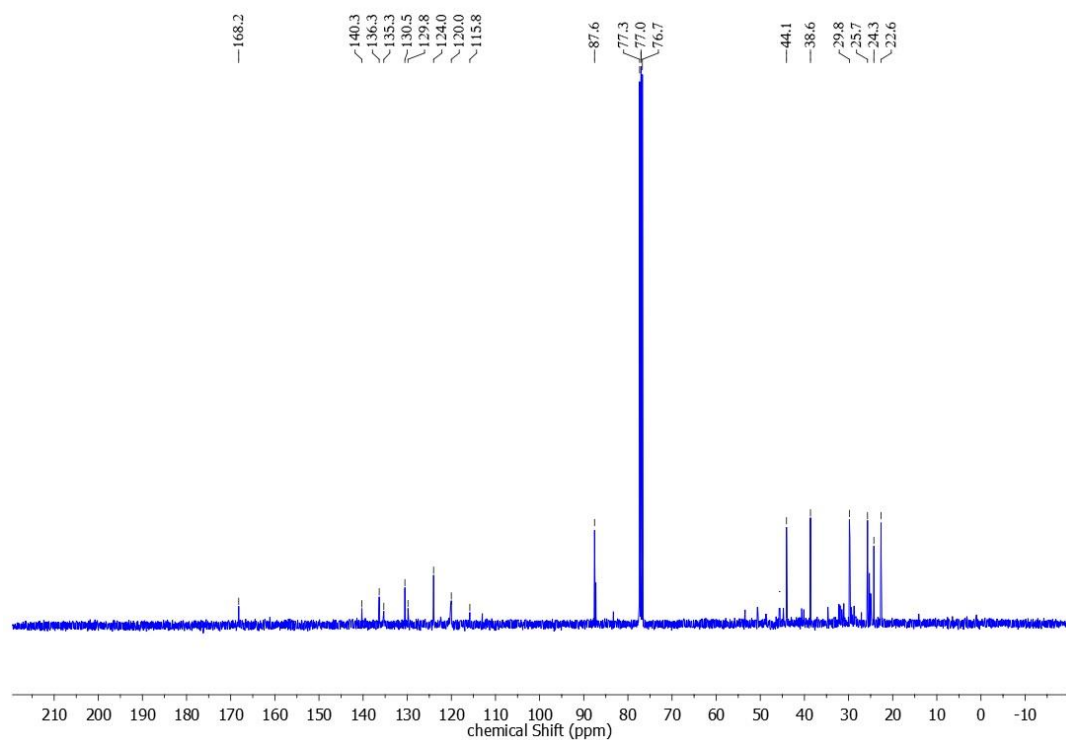



Crystal structure of 1h with 50% ellipsoidal probability

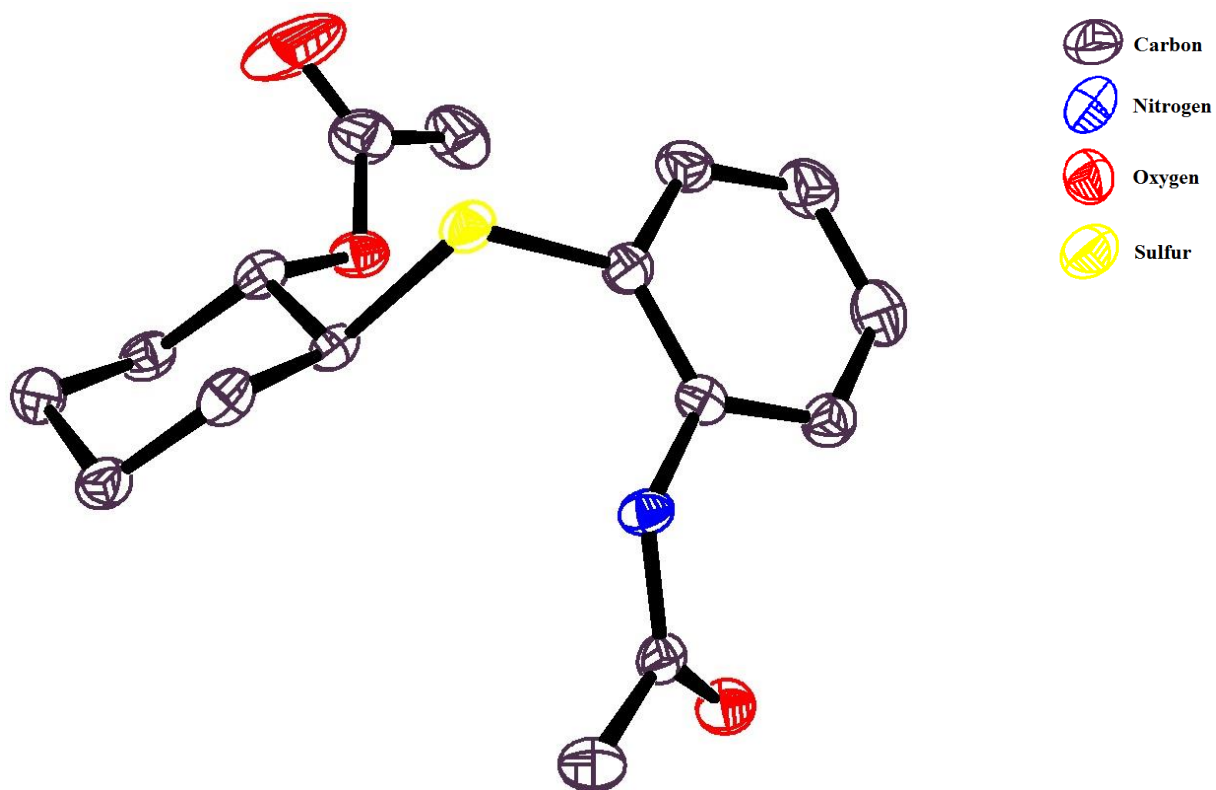

Packing diagram for 1h

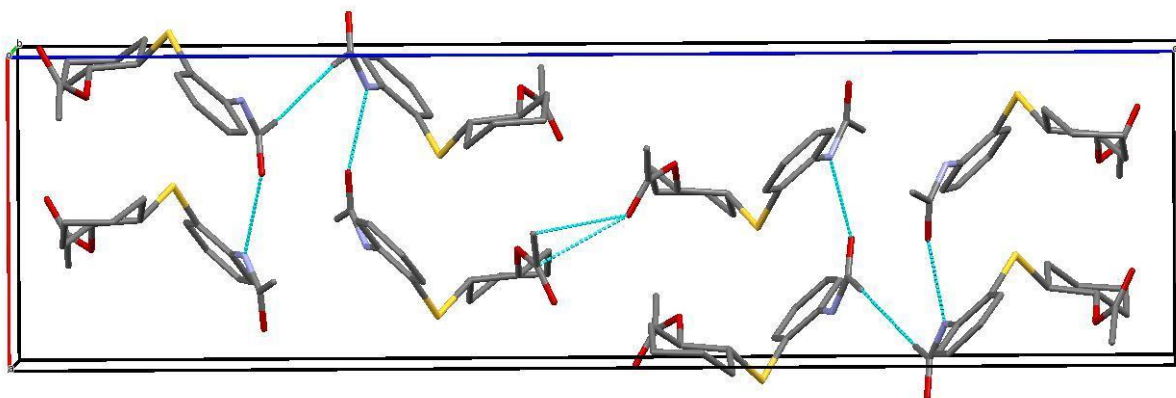

**Table 1. Crystal data and structure refinement for 1h.**

|                                   |                                                                              |          |
|-----------------------------------|------------------------------------------------------------------------------|----------|
| Identification code               | DP-521 (CCDC No. 1409837)                                                    |          |
| Empirical formula                 | C <sub>16</sub> H <sub>21</sub> N <sub>1</sub> O <sub>3</sub> S <sub>1</sub> |          |
| Formula weight                    | 307.40                                                                       |          |
| Temperature                       | 296(2) K                                                                     |          |
| Wavelength                        | 0.71073 Å                                                                    |          |
| Crystal system                    | Orthorhombic                                                                 |          |
| Space group                       | P n a 2 <sub>1</sub>                                                         |          |
| Unit cell dimensions              | a = 9.3777(6) Å                                                              | α = 90°. |
|                                   | b = 9.5320(6) Å                                                              | β = 90°. |
|                                   | c = 34.929(2) Å                                                              | γ = 90°. |
| Volume                            | 3122.2(3) Å <sup>3</sup>                                                     |          |
| Z                                 | 8                                                                            |          |
| Density (calculated)              | 1.308 Mg/m <sup>3</sup>                                                      |          |
| Absorption coefficient            | 0.217 mm <sup>-1</sup>                                                       |          |
| F(000)                            | 1312                                                                         |          |
| Theta range for data collection   | 1.166 to 26.055°.                                                            |          |
| Index ranges                      | -11 ≤ h ≤ 11, -10 ≤ k ≤ 11, -42 ≤ l ≤ 43                                     |          |
| Reflections collected             | 22493                                                                        |          |
| Independent reflections           | 6161 [R(int) = 0.0441]                                                       |          |
| Completeness to theta = 25.242°   | 100.0 %                                                                      |          |
| Refinement method                 | Full-matrix least-squares on F <sup>2</sup>                                  |          |
| Data / restraints / parameters    | 6161 / 1 / 383                                                               |          |
| Goodness-of-fit on F <sup>2</sup> | 1.072                                                                        |          |
| Final R indices [I > 2σ(I)]       | R1 = 0.0391, wR2 = 0.0849                                                    |          |
| R indices (all data)              | R1 = 0.0528, wR2 = 0.1055                                                    |          |
| Absolute structure parameter      | 0.01(4)                                                                      |          |
| Extinction coefficient            | n/a                                                                          |          |
| Largest diff. peak and hole       | 0.200 and -0.204 e.Å <sup>-3</sup>                                           |          |

**Table 2. Atomic coordinates (  $\times 10^4$ ) and equivalent isotropic displacement parameters ( $\text{\AA}^2 \times 10^3$ ) for 1h.  $U(\text{eq})$  is defined as one third of the trace of the orthogonalized  $U^{\text{ij}}$  tensor.**

| –     | x       | y       | z       | U(eq) |
|-------|---------|---------|---------|-------|
| S(1)  | 8515(1) | 5843(1) | 3629(1) | 24(1) |
| S(2)  | 5739(1) | 5875(1) | 6379(1) | 25(1) |
| O(5)  | 6379(3) | 5355(3) | 4319(1) | 23(1) |
| O(2)  | 3703(3) | 5480(3) | 5670(1) | 27(1) |
| O(4)  | 3962(3) | 6745(3) | 2858(1) | 28(1) |
| O(1)  | 1202(3) | 6809(3) | 7160(1) | 27(1) |
| O(6)  | 8034(4) | 4128(3) | 4641(1) | 43(1) |
| N(1)  | 3536(3) | 6561(3) | 6995(1) | 21(1) |
| N(2)  | 6304(4) | 6504(3) | 3015(1) | 20(1) |
| C(24) | 4578(4) | 6736(4) | 5690(1) | 23(1) |
| C(15) | 6880(5) | 4192(4) | 4498(1) | 26(1) |
| C(31) | 2414(4) | 7290(4) | 7132(1) | 21(1) |
| C(2)  | 6313(4) | 5091(4) | 3134(1) | 20(1) |
| C(7)  | 5171(4) | 7237(5) | 2876(1) | 21(1) |
| C(23) | 4697(4) | 7168(4) | 6106(1) | 21(1) |
| C(25) | 3911(5) | 7852(5) | 5445(1) | 26(1) |
| C(1)  | 7266(4) | 4665(4) | 3421(1) | 21(1) |
| O(3)  | 5270(5) | 4449(4) | 5284(1) | 79(2) |
| C(18) | 3521(4) | 5155(4) | 6870(1) | 19(1) |
| C(28) | 5420(5) | 8590(4) | 6147(1) | 24(1) |
| C(17) | 4459(4) | 4718(5) | 6578(1) | 22(1) |
| C(22) | 4472(5) | 3320(4) | 6468(1) | 29(1) |
| C(20) | 2646(5) | 2781(5) | 6920(2) | 33(1) |
| C(32) | 2755(5) | 8762(4) | 7258(1) | 27(1) |
| C(9)  | 7417(4) | 7083(4) | 3901(1) | 19(1) |

|       |         |         |         |       |
|-------|---------|---------|---------|-------|
| C(19) | 2609(5) | 4176(4) | 7037(1) | 25(1) |
| C(10) | 7252(4) | 6604(4) | 4317(1) | 20(1) |
| C(14) | 8126(5) | 8527(4) | 3880(1) | 24(1) |
| C(13) | 7378(5) | 9611(4) | 4131(1) | 26(1) |
| C(3)  | 5418(5) | 4104(4) | 2967(1) | 25(1) |
| C(5)  | 6436(5) | 2281(5) | 3355(2) | 31(1) |
| C(26) | 4700(5) | 9237(4) | 5478(1) | 29(1) |
| C(27) | 4721(5) | 9708(5) | 5894(1) | 26(1) |
| C(8)  | 5502(5) | 8695(4) | 2747(1) | 28(1) |
| C(6)  | 7324(5) | 3257(4) | 3524(1) | 27(1) |
| C(12) | 7298(5) | 9108(4) | 4544(1) | 27(1) |
| C(4)  | 5481(5) | 2712(5) | 3077(2) | 30(1) |
| C(11) | 6531(5) | 7705(5) | 4565(2) | 25(1) |
| C(29) | 4169(6) | 4418(5) | 5453(2) | 37(1) |
| C(21) | 3574(5) | 2345(5) | 6636(2) | 34(1) |
| C(16) | 5812(5) | 3036(5) | 4476(2) | 37(1) |
| C(30) | 3124(6) | 3213(5) | 5453(2) | 42(1) |

---

**Table 3. Selected bond lengths [ $\text{\AA}$  for 1h.**

|        |           |          |           |
|--------|-----------|----------|-----------|
| S1—C1  | 1.778 (4) | C32—H32A | 0.96      |
| S1—C9  | 1.834 (4) | C32—H32B | 0.96      |
| S2—C17 | 1.772 (4) | C32—H32C | 0.96      |
| S2—C23 | 1.839 (4) | C9—C14   | 1.531 (6) |
| O5—C15 | 1.355 (5) | C9—C10   | 1.531 (6) |
| O5—C10 | 1.445 (5) | C9—H9    | 0.98      |
| O2—C29 | 1.338 (5) | C19—H19  | 0.93      |
| O2—C24 | 1.453 (5) | C10—C11  | 1.519 (6) |
| O4—C7  | 1.229 (5) | C10—H10  | 0.98      |
| O1—C31 | 1.229 (5) | C14—C13  | 1.526 (6) |

|          |           |          |           |
|----------|-----------|----------|-----------|
| O6—C15   | 1.195 (5) | C14—H14A | 0.97      |
| N1—C31   | 1.349 (5) | C14—H14B | 0.97      |
| N1—C18   | 1.409 (5) | C13—C12  | 1.524 (6) |
| N1—H1    | 0.86      | C13—H13A | 0.97      |
| N2—C7    | 1.360 (5) | C13—H13B | 0.97      |
| N2—C2    | 1.409 (5) | C3—C4    | 1.382 (6) |
| N2—H2    | 0.86      | C3—H3    | 0.93      |
| C24—C25  | 1.501 (6) | C5—C6    | 1.381 (7) |
| C24—C23  | 1.516 (6) | C5—C4    | 1.384 (7) |
| C24—H24  | 0.98      | C5—H5    | 0.93      |
| C15—C16  | 1.491 (6) | C26—C27  | 1.520 (6) |
| C31—C32  | 1.505 (6) | C26—H26A | 0.97      |
| C2—C3    | 1.390 (6) | C26—H26B | 0.97      |
| C2—C1    | 1.403 (6) | C27—H27A | 0.97      |
| C7—C8    | 1.494 (6) | C27—H27B | 0.97      |
| C23—C28  | 1.523 (6) | C8—H8A   | 0.96      |
| C23—H23  | 0.98      | C8—H8B   | 0.96      |
| C25—C26  | 1.518 (6) | C8—H8C   | 0.96      |
| C25—H25A | 0.97      | C6—H6    | 0.93      |
| C25—H25B | 0.97      | C12—C11  | 1.521 (6) |
| C1—C6    | 1.391 (6) | C12—H12A | 0.97      |
| O3—C29   | 1.189 (6) | C12—H12B | 0.97      |
| C18—C19  | 1.394 (6) | C4—H4    | 0.93      |
| C18—C17  | 1.409 (6) | C11—H11A | 0.97      |
| C28—C27  | 1.531 (6) | C11—H11B | 0.97      |
| C28—H28A | 0.97      | C29—C30  | 1.510 (7) |
| C28—H28B | 0.97      | C21—H21  | 0.93      |
| C17—C22  | 1.387 (6) | C16—H16A | 0.96      |
| C22—C21  | 1.384 (6) | C16—H16B | 0.96      |
| C22—H22  | 0.93      | C16—H16C | 0.96      |

|         |           |          |      |
|---------|-----------|----------|------|
| C20—C21 | 1.384 (7) | C30—H30A | 0.96 |
| C20—C19 | 1.392 (6) | C30—H30B | 0.96 |
| C20—H20 | 0.93      | C30—H30C | 0.96 |

**Table 4. Selected bond angles [°] for 1h.**

|             |             |               |           |
|-------------|-------------|---------------|-----------|
| C1—S1—C9    | 104.41 (19) | O5—C10—C9     | 107.9 (3) |
| C17—S2—C23  | 105.10 (19) | C11—C10—C9    | 112.4 (4) |
| C15—O5—C10  | 118.7 (3)   | O5—C10—H10    | 109.4     |
| C29—O2—C24  | 117.7 (4)   | C11—C10—H10   | 109.4     |
| C31—N1—C18  | 126.3 (3)   | C9—C10—H10    | 109.4     |
| C31—N1—H1   | 116.9       | C13—C14—C9    | 112.4 (4) |
| C18—N1—H1   | 116.9       | C13—C14—H14A  | 109.1     |
| C7—N2—C2    | 126.9 (3)   | C9—C14—H14A   | 109.1     |
| C7—N2—H2    | 116.5       | C13—C14—H14B  | 109.1     |
| C2—N2—H2    | 116.5       | C9—C14—H14B   | 109.1     |
| O2—C24—C25  | 108.8 (3)   | H14A—C14—H14B | 107.8     |
| O2—C24—C23  | 108.1 (3)   | C12—C13—C14   | 110.7 (4) |
| C25—C24—C23 | 112.6 (4)   | C12—C13—H13A  | 109.5     |
| O2—C24—H24  | 109.1       | C14—C13—H13A  | 109.5     |
| C25—C24—H24 | 109.1       | C12—C13—H13B  | 109.5     |
| C23—C24—H24 | 109.1       | C14—C13—H13B  | 109.5     |
| O6—C15—O5   | 123.3 (4)   | H13A—C13—H13B | 108.1     |
| O6—C15—C16  | 126.3 (4)   | C4—C3—C2      | 120.5 (4) |
| O5—C15—C16  | 110.4 (4)   | C4—C3—H3      | 119.8     |
| O1—C31—N1   | 123.9 (4)   | C2—C3—H3      | 119.8     |
| O1—C31—C32  | 121.3 (4)   | C6—C5—C4      | 119.4 (4) |
| N1—C31—C32  | 114.7 (4)   | C6—C5—H5      | 120.3     |
| C3—C2—C1    | 119.3 (4)   | C4—C5—H5      | 120.3     |
| C3—C2—N2    | 121.3 (4)   | C25—C26—C27   | 109.6 (4) |
| C1—C2—N2    | 119.4 (4)   | C25—C26—H26A  | 109.7     |
| O4—C7—N2    | 122.9 (4)   | C27—C26—H26A  | 109.7     |

|               |           |               |           |
|---------------|-----------|---------------|-----------|
| O4—C7—C8      | 122.1 (4) | C25—C26—H26B  | 109.7     |
| N2—C7—C8      | 115.1 (4) | C27—C26—H26B  | 109.7     |
| C24—C23—C28   | 111.4 (4) | H26A—C26—H26B | 108.2     |
| C24—C23—S2    | 110.8 (3) | C26—C27—C28   | 110.5 (4) |
| C28—C23—S2    | 108.2 (3) | C26—C27—H27A  | 109.5     |
| C24—C23—H23   | 108.8     | C28—C27—H27A  | 109.5     |
| C28—C23—H23   | 108.8     | C26—C27—H27B  | 109.5     |
| S2—C23—H23    | 108.8     | C28—C27—H27B  | 109.5     |
| C24—C25—C26   | 111.8 (4) | H27A—C27—H27B | 108.1     |
| C24—C25—H25A  | 109.3     | C7—C8—H8A     | 109.5     |
| C26—C25—H25A  | 109.3     | C7—C8—H8B     | 109.5     |
| C24—C25—H25B  | 109.3     | H8A—C8—H8B    | 109.5     |
| C26—C25—H25B  | 109.3     | C7—C8—H8C     | 109.5     |
| H25A—C25—H25B | 107.9     | H8A—C8—H8C    | 109.5     |
| C6—C1—C2      | 119.3 (4) | H8B—C8—H8C    | 109.5     |
| C6—C1—S1      | 118.6 (3) | C5—C6—C1      | 121.0 (4) |
| C2—C1—S1      | 121.9 (3) | C5—C6—H6      | 119.5     |
| C19—C18—C17   | 119.2 (4) | C1—C6—H6      | 119.5     |
| C19—C18—N1    | 120.8 (4) | C11—C12—C13   | 110.2 (4) |
| C17—C18—N1    | 119.9 (4) | C11—C12—H12A  | 109.6     |
| C23—C28—C27   | 112.1 (4) | C13—C12—H12A  | 109.6     |
| C23—C28—H28A  | 109.2     | C11—C12—H12B  | 109.6     |
| C27—C28—H28A  | 109.2     | C13—C12—H12B  | 109.6     |
| C23—C28—H28B  | 109.2     | H12A—C12—H12B | 108.1     |
| C27—C28—H28B  | 109.2     | C3—C4—C5      | 120.5 (4) |
| H28A—C28—H28B | 107.9     | C3—C4—H4      | 119.7     |
| C22—C17—C18   | 119.3 (4) | C5—C4—H4      | 119.7     |
| C22—C17—S2    | 118.9 (3) | C10—C11—C12   | 111.7 (4) |
| C18—C17—S2    | 121.5 (3) | C10—C11—H11A  | 109.3     |
| C21—C22—C17   | 121.5 (4) | C12—C11—H11A  | 109.3     |

|               |           |               |           |
|---------------|-----------|---------------|-----------|
| C21—C22—H22   | 119.2     | C10—C11—H11B  | 109.3     |
| C17—C22—H22   | 119.2     | C12—C11—H11B  | 109.3     |
| C21—C20—C19   | 120.9 (4) | H11A—C11—H11B | 107.9     |
| C21—C20—H20   | 119.6     | O3—C29—O2     | 123.1 (5) |
| C19—C20—H20   | 119.6     | O3—C29—C30    | 125.6 (5) |
| C31—C32—H32A  | 109.5     | O2—C29—C30    | 111.3 (4) |
| C31—C32—H32B  | 109.5     | C20—C21—C22   | 118.9 (4) |
| H32A—C32—H32B | 109.5     | C20—C21—H21   | 120.5     |
| C31—C32—H32C  | 109.5     | C22—C21—H21   | 120.5     |
| H32A—C32—H32C | 109.5     | C15—C16—H16A  | 109.5     |
| H32B—C32—H32C | 109.5     | C15—C16—H16B  | 109.5     |
| C14—C9—C10    | 111.0 (4) | H16A—C16—H16B | 109.5     |
| C14—C9—S1     | 108.1 (3) | C15—C16—H16C  | 109.5     |
| C10—C9—S1     | 110.9 (3) | H16A—C16—H16C | 109.5     |
| C14—C9—H9     | 108.9     | H16B—C16—H16C | 109.5     |
| C10—C9—H9     | 108.9     | C29—C30—H30A  | 109.5     |
| S1—C9—H9      | 108.9     | C29—C30—H30B  | 109.5     |
| C20—C19—C18   | 120.1 (4) | H30A—C30—H30B | 109.5     |
| C20—C19—H19   | 120       | C29—C30—H30C  | 109.5     |
| C18—C19—H19   | 120       | H30A—C30—H30C | 109.5     |
| O5—C10—C11    | 108.3 (3) | H30B—C30—H30C | 109.5     |

**Table 5.** Anisotropic displacement parameters ( $\text{\AA}^2 \times 10^3$ ) for **1h**. The anisotropic displacement factor exponent takes the form:  $-2\pi^2 [ h^2 a^* 2U_{11} + \dots + 2 h k a^* b^* U_{12} ]$

|                   | U <sub>11</sub> | U <sub>22</sub> | U <sub>33</sub> | U <sub>23</sub> | U <sub>13</sub> | U <sub>12</sub> |
|-------------------|-----------------|-----------------|-----------------|-----------------|-----------------|-----------------|
| $\overline{S(1)}$ | 18(1)           | 31(1)           | 22(1)           | -3(1)           | -1(1)           | 3(1)            |
| S(2)              | 18(1)           | 34(1)           | 23(1)           | 2(1)            | 1(1)            | 3(1)            |
| O(5)              | 24(2)           | 21(2)           | 24(2)           | 4(1)            | -2(1)           | -2(1)           |
| O(2)              | 26(2)           | 26(2)           | 29(2)           | -9(1)           | 1(1)            | 0(1)            |



|       |       |       |       |        |       |        |
|-------|-------|-------|-------|--------|-------|--------|
| O(4)  | 20(2) | 30(2) | 35(2) | -1(1)  | -2(2) | 2(1)   |
| O(1)  | 18(2) | 32(2) | 32(2) | 2(1)   | 1(1)  | 1(1)   |
| O(6)  | 36(2) | 41(2) | 52(2) | 16(2)  | -7(2) | 9(2)   |
| N(1)  | 15(2) | 22(2) | 24(2) | -3(2)  | 3(2)  | -1(2)  |
| N(2)  | 16(2) | 22(2) | 22(2) | 0(2)   | -2(2) | -2(2)  |
| C(24) | 18(2) | 29(2) | 21(3) | -4(2)  | 0(2)  | -1(2)  |
| C(15) | 35(3) | 25(2) | 17(2) | 2(2)   | 3(2)  | 8(2)   |
| C(31) | 20(2) | 27(2) | 15(3) | 2(2)   | -2(2) | 4(2)   |
| C(2)  | 21(2) | 18(2) | 20(2) | -2(2)  | 2(2)  | 1(2)   |
| C(7)  | 20(2) | 25(2) | 17(3) | -1(2)  | 2(2)  | 1(2)   |
| C(23) | 17(2) | 29(2) | 17(2) | -1(2)  | 3(2)  | 1(2)   |
| C(25) | 24(2) | 35(2) | 18(3) | -4(2)  | -1(2) | 3(2)   |
| C(1)  | 19(2) | 26(2) | 17(2) | -3(2)  | 1(2)  | 6(2)   |
| O(3)  | 68(3) | 72(3) | 97(4) | -57(3) | 44(3) | -16(2) |
| C(18) | 18(2) | 21(2) | 20(2) | -1(2)  | -5(2) | 1(2)   |
| C(28) | 24(2) | 30(2) | 18(2) | -6(2)  | 0(2)  | -5(2)  |
| C(17) | 20(2) | 28(2) | 19(2) | 2(2)   | -2(2) | 3(2)   |
| C(22) | 36(3) | 26(2) | 25(3) | -3(2)  | -1(2) | 7(2)   |
| C(20) | 36(3) | 26(2) | 36(3) | 5(2)   | -3(2) | -6(2)  |
| C(32) | 26(2) | 27(2) | 28(3) | -7(2)  | -1(2) | 2(2)   |
| C(9)  | 15(2) | 25(2) | 17(2) | -1(2)  | 1(2)  | 1(2)   |
| C(19) | 26(2) | 28(2) | 22(3) | -1(2)  | 0(2)  | 1(2)   |
| C(10) | 19(2) | 22(2) | 20(2) | 0(2)   | -5(2) | -1(2)  |
| C(14) | 24(2) | 29(2) | 18(2) | 4(2)   | -4(2) | -4(2)  |
| C(13) | 29(2) | 20(2) | 30(3) | 1(2)   | -4(2) | 0(2)   |
| C(3)  | 25(2) | 28(2) | 22(3) | -4(2)  | -3(2) | 1(2)   |
| C(5)  | 45(3) | 21(2) | 28(3) | 3(2)   | 7(2)  | 1(2)   |
| C(26) | 33(3) | 30(2) | 25(3) | 2(2)   | 1(2)  | 3(2)   |
| C(27) | 29(2) | 25(2) | 25(3) | -5(2)  | 5(2)  | -1(2)  |

|       |       |       |       |        |       |       |
|-------|-------|-------|-------|--------|-------|-------|
| C(8)  | 26(2) | 28(2) | 29(3) | 5(2)   | 1(2)  | 6(2)  |
| C(6)  | 36(3) | 27(2) | 19(3) | 1(2)   | 1(2)  | 7(2)  |
| C(12) | 35(3) | 25(2) | 21(3) | -5(2)  | -5(2) | -1(2) |
| C(4)  | 35(2) | 24(2) | 33(3) | -8(2)  | 5(2)  | -4(2) |
| C(11) | 25(2) | 30(2) | 20(3) | -3(2)  | -3(2) | -2(2) |
| C(29) | 44(3) | 34(3) | 32(3) | -11(2) | -1(3) | 4(2)  |
| C(21) | 49(3) | 22(2) | 30(3) | -5(2)  | -2(2) | 2(2)  |
| C(16) | 52(3) | 22(2) | 37(3) | 3(2)   | 10(3) | -2(2) |
| C(30) | 57(3) | 27(3) | 42(3) | -7(2)  | -8(3) | 1(2)  |

**Table 6. Hydrogen coordinates (  $\times 10^4$ ) and isotropic displacement parameters ( $\text{\AA}^2 \times 10^3$ ) for 1h.**

|        | x    | y    | z    | U(eq) |
|--------|------|------|------|-------|
| H(1)   | 4338 | 6996 | 6982 | 25    |
| H(2)   | 7098 | 6950 | 3032 | 24    |
| H(24)  | 5531 | 6522 | 5591 | 27    |
| H(23)  | 3737 | 7225 | 6216 | 25    |
| H(25A) | 2927 | 7984 | 5522 | 31    |
| H(25B) | 3915 | 7549 | 5180 | 31    |
| H(28A) | 6417 | 8502 | 6077 | 29    |
| H(28B) | 5373 | 8887 | 6412 | 29    |
| H(22)  | 5098 | 3031 | 6278 | 35    |
| H(20)  | 2038 | 2133 | 7034 | 39    |
| H(32A) | 2051 | 9395 | 7159 | 40    |
| H(32B) | 3679 | 9023 | 7164 | 40    |
| H(32C) | 2753 | 8806 | 7533 | 40    |
| H(9)   | 6471 | 7138 | 3783 | 23    |
| H(19)  | 1976 | 4455 | 7227 | 30    |

|        |      |       |      |    |
|--------|------|-------|------|----|
| H(10)  | 8193 | 6385  | 4423 | 24 |
| H(14A) | 9113 | 8445  | 3960 | 28 |
| H(14B) | 8119 | 8849  | 3616 | 28 |
| H(13A) | 7896 | 10492 | 4120 | 32 |
| H(13B) | 6423 | 9774  | 4034 | 32 |
| H(3)   | 4772 | 4382  | 2779 | 30 |
| H(5)   | 6478 | 1343  | 3428 | 38 |
| H(26A) | 4230 | 9941  | 5323 | 35 |
| H(26B) | 5668 | 9129  | 5386 | 35 |
| H(27A) | 3753 | 9875  | 5981 | 32 |
| H(27B) | 5247 | 10581 | 5916 | 32 |
| H(8A)  | 5551 | 8717  | 2472 | 41 |
| H(8B)  | 6402 | 8984  | 2852 | 41 |
| H(8C)  | 4767 | 9321  | 2833 | 41 |
| H(6)   | 7971 | 2967  | 3710 | 32 |
| H(12A) | 8254 | 9012  | 4647 | 33 |
| H(12B) | 6792 | 9795  | 4698 | 33 |
| H(4)   | 4877 | 2061  | 2963 | 37 |
| H(11A) | 6515 | 7384  | 4829 | 30 |
| H(11B) | 5552 | 7824  | 4481 | 30 |
| H(21)  | 3595 | 1411  | 6559 | 40 |
| H(16A) | 6212 | 2198  | 4585 | 55 |
| H(16B) | 5564 | 2868  | 4214 | 55 |
| H(16C) | 4973 | 3297  | 4617 | 55 |
| H(30A) | 3360 | 2574  | 5250 | 63 |
| H(30B) | 2177 | 3568  | 5414 | 63 |
| H(30C) | 3170 | 2733  | 5694 | 63 |

---

## Crystal Structure of 2a

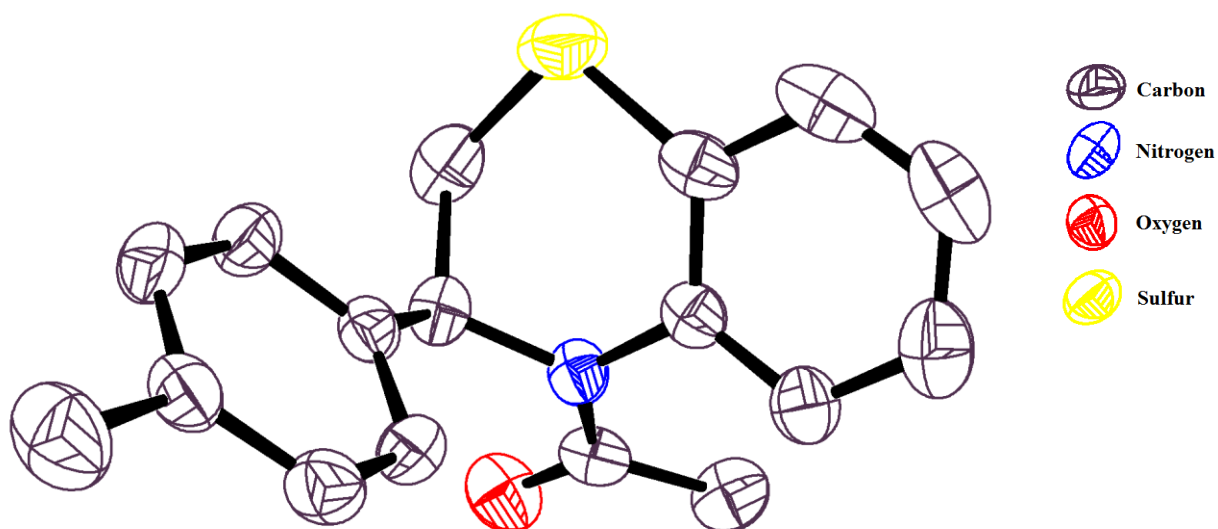

## Packing diagram of 2a

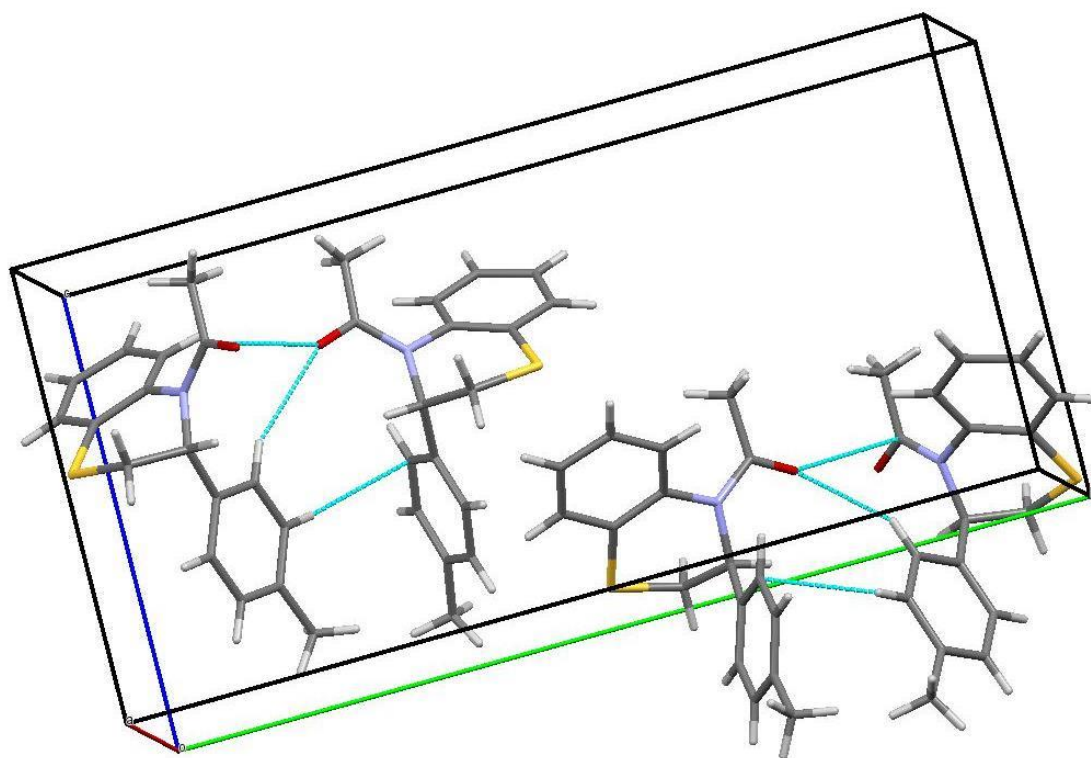

**Table 7. Crystal data and structure refinement for 2a**

|                                   |                                             |          |
|-----------------------------------|---------------------------------------------|----------|
| Identification code               | DP_548 (CCDC No. 1409829)                   |          |
| Empirical formula                 | C <sub>17</sub> H <sub>17</sub> N O S       |          |
| Formula weight                    | 283.37                                      |          |
| Temperature                       | 301(2) K                                    |          |
| Wavelength                        | 0.71073 Å                                   |          |
| Crystal system                    | Orthorhombic                                |          |
| Space group                       | P n a 21                                    |          |
| Unit cell dimensions              | a = 6.2101(4) Å                             | α = 90°. |
|                                   | b = 21.6012(15) Å                           | β = 90°. |
|                                   | c = 10.6587(8) Å                            | γ = 90°. |
| Volume                            | 1429.82(17) Å <sup>3</sup>                  |          |
| Z                                 | 4                                           |          |
| Density (calculated)              | 1.316 Mg/m <sup>3</sup>                     |          |
| Absorption coefficient            | 0.221 mm <sup>-1</sup>                      |          |
| F(000)                            | 600                                         |          |
| Theta range for data collection   | 2.131 to 25.053°.                           |          |
| Index ranges                      | -7 ≤ h ≤ 7, -25 ≤ k ≤ 25, -12 ≤ l ≤ 12      |          |
| Reflections collected             | 16452                                       |          |
| Independent reflections           | 2542 [R(int) = 0.0617]                      |          |
| Completeness to theta = 25.242°   | 98.0 %                                      |          |
| Absorption correction             | None                                        |          |
| Refinement method                 | Full-matrix least-squares on F <sup>2</sup> |          |
| Data / restraints / parameters    | 2542 / 1 / 183                              |          |
| Goodness-of-fit on F <sup>2</sup> | 1.050                                       |          |
| Final R indices [I > 2σ(I)]       | R1 = 0.0357, wR2 = 0.0789                   |          |
| R indices (all data)              | R1 = 0.0499, wR2 = 0.0847                   |          |
| Absolute structure parameter      | -0.02(5)                                    |          |
| Extinction coefficient            | n/a                                         |          |
| Largest diff. peak and hole       | 0.160 and -0.130 e.Å <sup>-3</sup>          |          |

**Table 8. Atomic coordinates (  $\times 10^4$ ) and equivalent isotropic displacement parameters ( $\text{\AA}^2 \times 10^3$ ) for 2a. U(eq) is defined as one third of the trace of the orthogonalized  $U_{ij}$  tensor.**

|       | x       | y       | z       | U(eq) |
|-------|---------|---------|---------|-------|
| S(1)  | 4919(2) | 4917(1) | 5436(1) | 62(1) |
| N(1)  | 4454(4) | 3584(1) | 6541(2) | 38(1) |
| O(1)  | 6832(4) | 2821(1) | 6955(2) | 59(1) |
| C(16) | 5484(6) | 3181(2) | 7338(3) | 41(1) |
| C(6)  | 2876(5) | 4028(1) | 6934(3) | 36(1) |
| C(13) | 294(5)  | 3083(2) | 3547(3) | 42(1) |
| C(10) | 3916(5) | 3754(2) | 3054(3) | 44(1) |
| C(9)  | 3595(5) | 3553(1) | 4262(3) | 35(1) |
| C(12) | 647(5)  | 3278(1) | 2331(3) | 40(1) |
| C(8)  | 5296(5) | 3644(1) | 5263(3) | 40(1) |
| C(5)  | 1165(5) | 3854(2) | 7684(3) | 45(1) |
| C(11) | 2488(6) | 3618(2) | 2098(3) | 47(1) |
| C(14) | 1724(5) | 3217(2) | 4499(3) | 41(1) |
| C(1)  | 3015(5) | 4641(1) | 6516(3) | 43(1) |
| C(4)  | -279(6) | 4281(2) | 8129(4) | 58(1) |
| C(3)  | -111(6) | 4889(2) | 7772(4) | 61(1) |
| C(7)  | 6568(5) | 4245(2) | 5179(3) | 53(1) |
| C(2)  | 1472(6) | 5060(2) | 6948(4) | 58(1) |
| C(17) | 4964(6) | 3198(2) | 8716(3) | 54(1) |
| C(15) | -904(7) | 3119(2) | 1287(4) | 59(1) |

**Table 9. Selected bond lengths [ $\text{\AA}$ ] for 2a.**

|       |           |       |      |
|-------|-----------|-------|------|
| S1—C1 | 1.754 (4) | C8—H8 | 0.98 |
|-------|-----------|-------|------|

|         |           |          |           |
|---------|-----------|----------|-----------|
| S1—C7   | 1.797 (4) | C5—C4    | 1.371 (5) |
| N1—C16  | 1.375 (4) | C5—H5    | 0.93      |
| N1—C6   | 1.434 (4) | C11—H11  | 0.93      |
| N1—C8   | 1.465 (5) | C14—H14  | 0.93      |
| O1—C16  | 1.214 (4) | C1—C2    | 1.396 (5) |
| C16—C17 | 1.504 (5) | C4—C3    | 1.370 (6) |
| C6—C5   | 1.382 (4) | C4—H4    | 0.93      |
| C6—C1   | 1.398 (4) | C3—C2    | 1.370 (6) |
| C13—C14 | 1.379 (5) | C3—H3    | 0.93      |
| C13—C12 | 1.380 (5) | C7—H7A   | 0.97      |
| C13—H13 | 0.93      | C7—H7B   | 0.97      |
| C10—C9  | 1.375 (5) | C2—H2    | 0.93      |
| C10—C11 | 1.383 (5) | C17—H17A | 0.96      |
| C10—H10 | 0.93      | C17—H17B | 0.96      |
| C9—C14  | 1.393 (4) | C17—H17C | 0.96      |
| C9—C8   | 1.515 (4) | C15—H15A | 0.96      |
| C12—C11 | 1.382 (5) | C15—H15B | 0.96      |
| C12—C15 | 1.512 (5) | C15—H15C | 0.96      |
| C8—C7   | 1.522 (4) |          |           |

---

**Table 10. Selected bond angles [°] for 2a.**

|            |             |             |           |
|------------|-------------|-------------|-----------|
| C1—S1—C7   | 102.12 (15) | C13—C14—C9  | 120.8 (3) |
| C16—N1—C6  | 124.1 (3)   | C13—C14—H14 | 119.6     |
| C16—N1—C8  | 117.7 (3)   | C9—C14—H14  | 119.6     |
| C6—N1—C8   | 117.1 (2)   | C2—C1—C6    | 117.8 (3) |
| O1—C16—N1  | 121.3 (3)   | C2—C1—S1    | 117.3 (3) |
| O1—C16—C17 | 119.4 (3)   | C6—C1—S1    | 124.9 (3) |
| N1—C16—C17 | 119.3 (3)   | C3—C4—C5    | 119.9 (4) |
| C5—C6—C1   | 119.3 (3)   | C3—C4—H4    | 120       |

|             |           |               |           |
|-------------|-----------|---------------|-----------|
| C5—C6—N1    | 120.8 (3) | C5—C4—H4      | 120       |
| C1—C6—N1    | 119.9 (3) | C2—C3—C4      | 119.4 (3) |
| C14—C13—C12 | 121.7 (3) | C2—C3—H3      | 120.3     |
| C14—C13—H13 | 119.2     | C4—C3—H3      | 120.3     |
| C12—C13—H13 | 119.2     | C8—C7—S1      | 112.5 (2) |
| C9—C10—C11  | 122.0 (3) | C8—C7—H7A     | 109.1     |
| C9—C10—H10  | 119       | S1—C7—H7A     | 109.1     |
| C11—C10—H10 | 119       | C8—C7—H7B     | 109.1     |
| C10—C9—C14  | 117.2 (3) | S1—C7—H7B     | 109.1     |
| C10—C9—C8   | 121.1 (3) | H7A—C7—H7B    | 107.8     |
| C14—C9—C8   | 121.5 (3) | C3—C2—C1      | 121.9 (3) |
| C13—C12—C11 | 117.5 (3) | C3—C2—H2      | 119       |
| C13—C12—C15 | 121.4 (3) | C1—C2—H2      | 119       |
| C11—C12—C15 | 121.0 (3) | C16—C17—H17A  | 109.5     |
| N1—C8—C9    | 113.2 (2) | C16—C17—H17B  | 109.5     |
| N1—C8—C7    | 108.4 (3) | H17A—C17—H17B | 109.5     |
| C9—C8—C7    | 115.6 (3) | C16—C17—H17C  | 109.5     |
| N1—C8—H8    | 106.3     | H17A—C17—H17C | 109.5     |
| C9—C8—H8    | 106.3     | H17B—C17—H17C | 109.5     |
| C7—C8—H8    | 106.3     | C12—C15—H15A  | 109.5     |
| C4—C5—C6    | 121.3 (3) | C12—C15—H15B  | 109.5     |
| C4—C5—H5    | 119.4     | H15A—C15—H15B | 109.5     |
| C6—C5—H5    | 119.4     | C12—C15—H15C  | 109.5     |
| C12—C11—C10 | 120.8 (3) | H15A—C15—H15C | 109.5     |
| C12—C11—H11 | 119.6     | H15B—C15—H15C | 109.5     |
| C10—C11—H11 | 119.6     |               |           |

**Table 11.** Anisotropic displacement parameters ( $\text{\AA}^2 \times 10^3$ ) for 2a. The anisotropic displacement factor exponent takes the form:  $-2\pi^2 [ h^2 a^{*2} U^{11} + \dots + 2 h k a^* b^* U^{12} ]$



|       | U11   | U22   | U33   | U23    | U13    | U12    |
|-------|-------|-------|-------|--------|--------|--------|
| S(1)  | 79(1) | 45(1) | 62(1) | 7(1)   | -4(1)  | -19(1) |
| N(1)  | 42(1) | 40(2) | 32(1) | 0(1)   | -4(1)  | 7(1)   |
| O(1)  | 59(1) | 54(1) | 64(2) | -1(1)  | -14(1) | 21(1)  |
| C(16) | 41(2) | 36(2) | 46(2) | 2(2)   | -14(2) | -1(2)  |
| C(6)  | 39(2) | 37(2) | 33(2) | -3(1)  | -8(2)  | 1(1)   |
| C(13) | 39(2) | 40(2) | 47(2) | -4(2)  | 0(2)   | -7(1)  |
| C(10) | 47(2) | 49(2) | 36(2) | -1(2)  | 2(2)   | -12(2) |
| C(9)  | 37(2) | 33(2) | 34(2) | -3(1)  | -1(1)  | 5(1)   |
| C(12) | 48(2) | 35(2) | 37(2) | -7(2)  | -5(2)  | 3(2)   |
| C(8)  | 36(2) | 48(2) | 36(2) | 1(2)   | 0(2)   | 4(1)   |
| C(5)  | 43(2) | 49(2) | 42(2) | -5(2)  | -2(2)  | 2(2)   |
| C(11) | 62(2) | 51(2) | 28(2) | 0(2)   | 2(2)   | -8(2)  |
| C(14) | 50(2) | 40(2) | 33(2) | 5(1)   | 2(2)   | -2(2)  |
| C(1)  | 45(2) | 37(2) | 47(2) | -6(2)  | -16(2) | -3(2)  |
| C(4)  | 45(2) | 75(3) | 53(2) | -14(2) | 1(2)   | 4(2)   |
| C(3)  | 53(2) | 60(3) | 68(3) | -26(2) | -10(2) | 16(2)  |
| C(7)  | 45(2) | 73(2) | 42(2) | 1(2)   | -6(2)  | -18(2) |
| C(2)  | 66(2) | 37(2) | 70(3) | -7(2)  | -25(2) | 6(2)   |
| C(17) | 56(2) | 64(2) | 42(2) | 13(2)  | -15(2) | 1(2)   |
| C(15) | 67(2) | 57(2) | 51(2) | -9(2)  | -20(2) | 0(2)   |

**Table 12. Hydrogen coordinates (  $\times 10^4$ ) and isotropic displacement parameters ( $\text{\AA}^2 \times 10^3$ ) for XXXX**

|       | x    | y    | z    | U(eq) |
|-------|------|------|------|-------|
| H(13) | -940 | 2856 | 3729 | 50    |

|        |       |      |      |    |
|--------|-------|------|------|----|
| H(10)  | 5132  | 3990 | 2873 | 53 |
| H(8)   | 6340  | 3308 | 5154 | 48 |
| H(5)   | 989   | 3439 | 7891 | 54 |
| H(11)  | 2769  | 3757 | 1288 | 57 |
| H(14)  | 1436  | 3080 | 5310 | 49 |
| H(4)   | -1370 | 4159 | 8673 | 69 |
| H(3)   | -1065 | 5182 | 8087 | 73 |
| H(7A)  | 7228  | 4274 | 4356 | 64 |
| H(7B)  | 7713  | 4238 | 5798 | 64 |
| H(2)   | 1521  | 5467 | 6667 | 69 |
| H(17A) | 3740  | 2939 | 8879 | 81 |
| H(17B) | 4643  | 3615 | 8961 | 81 |
| H(17C) | 6178  | 3050 | 9186 | 81 |
| H(15A) | -2334 | 3239 | 1525 | 88 |
| H(15B) | -869  | 2681 | 1135 | 88 |
| H(15C) | -493  | 3335 | 537  | 88 |

---

### Crystal Structure of 2g with 50% ellipsoidal probability

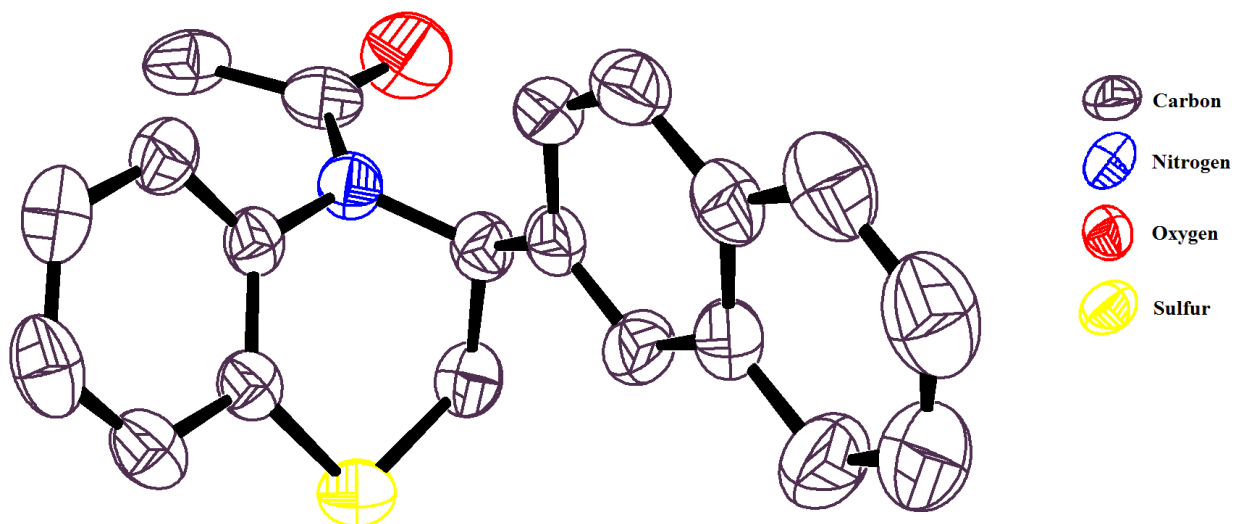

### Packing diagram of 2g

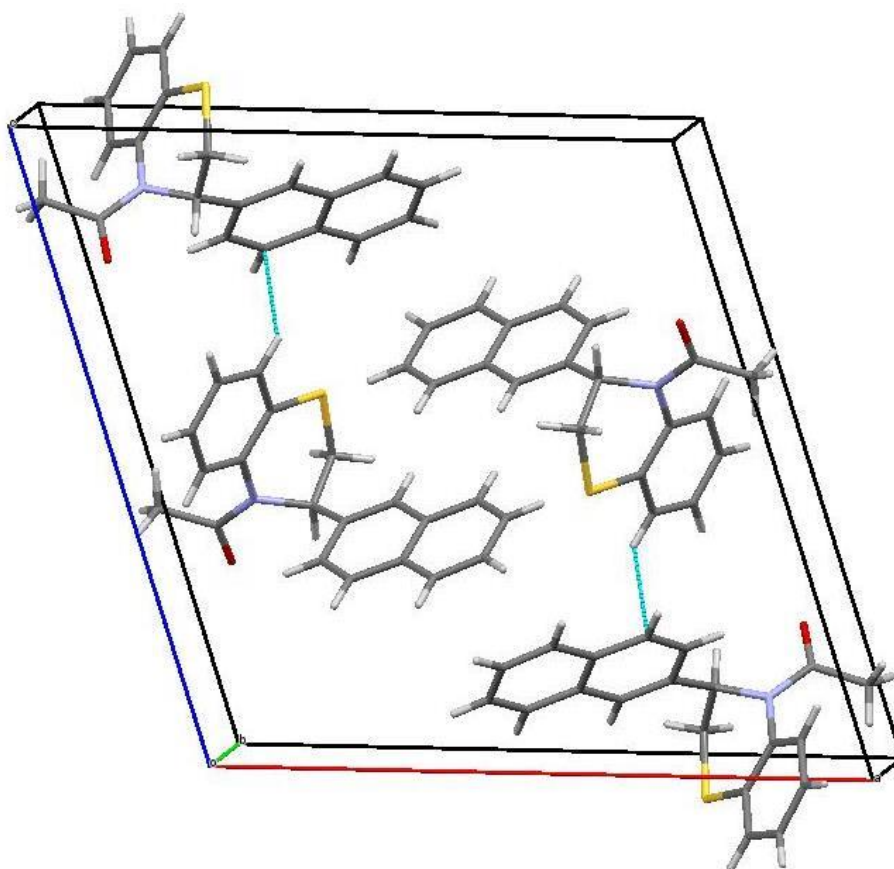

**Table 13. Crystal data and structure refinement for 2g**

|                     |                                       |
|---------------------|---------------------------------------|
| Identification code | DP_547 (CCDC No. 1409828)             |
| Empirical formula   | C <sub>20</sub> H <sub>17</sub> N O S |

|                                   |                                             |                  |
|-----------------------------------|---------------------------------------------|------------------|
| Formula weight                    | 319.40                                      |                  |
| Temperature                       | 296(2) K                                    |                  |
| Wavelength                        | 0.71073 Å                                   |                  |
| Crystal system                    | Monoclinic                                  |                  |
| Space group                       | P 2 <sub>1</sub> /c                         |                  |
| Unit cell dimensions              | a = 16.3601(8) Å                            | α = 90°.         |
|                                   | b = 6.1956(3) Å                             | β = 108.141(2)°. |
|                                   | c = 16.4686(8) Å                            | γ = 90°.         |
| Volume                            | 1586.29(13) Å <sup>3</sup>                  |                  |
| Z                                 | 4                                           |                  |
| Density (calculated)              | 1.337 Mg/m <sup>3</sup>                     |                  |
| Absorption coefficient            | 0.208 mm <sup>-1</sup>                      |                  |
| F(000)                            | 672                                         |                  |
| Theta range for data collection   | 1.310 to 25.717°.                           |                  |
| Index ranges                      | -19 ≤ h ≤ 19, -7 ≤ k ≤ 7, -19 ≤ l ≤ 20      |                  |
| Reflections collected             | 14231                                       |                  |
| Independent reflections           | 2997 [R(int) = 0.0178]                      |                  |
| Completeness to theta = 25.242°   | 99.1 %                                      |                  |
| Absorption correction             | None                                        |                  |
| Refinement method                 | Full-matrix least-squares on F <sup>2</sup> |                  |
| Data / restraints / parameters    | 2997 / 0 / 209                              |                  |
| Goodness-of-fit on F <sup>2</sup> | 1.038                                       |                  |
| Final R indices [I > 2σ(I)]       | R1 = 0.0352, wR2 = 0.0921                   |                  |
| R indices (all data)              | R1 = 0.0419, wR2 = 0.0972                   |                  |
| Extinction coefficient            | n/a                                         |                  |
| Largest diff. peak and hole       | 0.159 and -0.190 e.Å <sup>-3</sup>          |                  |

**Table 14. Atomic coordinates (  $\times 10^4$  ) and equivalent isotropic displacement parameters ( $\text{\AA}^2 \times 10^3$ ) for 2g. U(eq) is defined as one third of the trace of the orthogonalized  $U^{ij}$  tensor.**

|       | x        | y        | z       | U(eq) |
|-------|----------|----------|---------|-------|
| S(1)  | 7081(1)  | -337(1)  | 4458(1) | 55(1) |
| N(1)  | 8571(1)  | 541(2)   | 6119(1) | 45(1) |
| O(1)  | 9328(1)  | -1585(3) | 7189(1) | 89(1) |
| C(1)  | 8494(1)  | 2038(2)  | 5447(1) | 40(1) |
| C(6)  | 7834(1)  | 1776(2)  | 4674(1) | 42(1) |
| C(9)  | 7246(1)  | 1736(2)  | 6399(1) | 44(1) |
| C(2)  | 9025(1)  | 3838(3)  | 5565(1) | 49(1) |
| C(5)  | 7755(1)  | 3276(3)  | 4023(1) | 52(1) |
| C(18) | 7688(1)  | 3369(3)  | 6964(1) | 50(1) |
| C(8)  | 7754(1)  | -164(2)  | 6231(1) | 47(1) |
| C(10) | 6373(1)  | 1875(3)  | 6074(1) | 53(1) |
| C(17) | 7259(1)  | 5016(3)  | 7192(1) | 54(1) |
| C(19) | 9318(1)  | -443(3)  | 6586(1) | 54(1) |
| C(11) | 5907(1)  | 3580(3)  | 6294(1) | 52(1) |
| C(7)  | 7298(1)  | -1634(3) | 5488(1) | 53(1) |
| C(16) | 6357(1)  | 5191(3)  | 6864(1) | 50(1) |
| C(20) | 10116(1) | -149(3)  | 6330(1) | 62(1) |
| C(3)  | 8946(1)  | 5276(3)  | 4906(1) | 57(1) |
| C(4)  | 8317(1)  | 4975(3)  | 4135(1) | 61(1) |
| C(15) | 5884(1)  | 6892(3)  | 7076(1) | 67(1) |
| C(12) | 5005(1)  | 3748(4)  | 5951(1) | 77(1) |
| C(14) | 5016(2)  | 6997(4)  | 6726(1) | 79(1) |
| C(13) | 4575(1)  | 5414(4)  | 6161(2) | 84(1) |

**Table 15. Selected bond lengths [ $\text{\AA}$ ] for 2g.**

|       |             |         |           |
|-------|-------------|---------|-----------|
| S1—C6 | 1.7555 (15) | C17—C16 | 1.409 (2) |
|-------|-------------|---------|-----------|

|         |             |          |           |
|---------|-------------|----------|-----------|
| S1—C7   | 1.8098 (17) | C17—H17  | 0.93      |
| N1—C19  | 1.368 (2)   | C19—C20  | 1.502 (2) |
| N1—C1   | 1.4185 (18) | C11—C12  | 1.409 (2) |
| N1—C8   | 1.4722 (18) | C11—C16  | 1.411 (2) |
| O1—C19  | 1.215 (2)   | C7—H7A   | 0.97      |
| C1—C2   | 1.390 (2)   | C7—H7B   | 0.97      |
| C1—C6   | 1.400 (2)   | C16—C15  | 1.413 (2) |
| C6—C5   | 1.393 (2)   | C20—H20A | 0.96      |
| C9—C10  | 1.363 (2)   | C20—H20B | 0.96      |
| C9—C18  | 1.412 (2)   | C20—H20C | 0.96      |
| C9—C8   | 1.515 (2)   | C3—C4    | 1.377 (3) |
| C2—C3   | 1.377 (2)   | C3—H3    | 0.93      |
| C2—H2   | 0.93        | C4—H4    | 0.93      |
| C5—C4   | 1.372 (2)   | C15—C14  | 1.358 (3) |
| C5—H5   | 0.93        | C15—H15  | 0.93      |
| C18—C17 | 1.356 (2)   | C12—C13  | 1.354 (3) |
| C18—H18 | 0.93        | C12—H12  | 0.93      |
| C8—C7   | 1.521 (2)   | C14—C13  | 1.389 (3) |
| C8—H8   | 0.98        | C14—H14  | 0.93      |
| C10—C11 | 1.414 (2)   | C13—H13  | 0.93      |
| C10—H10 | 0.93        |          |           |

**Table 16. Selected bond angles [°] for 2g.**

|           |             |             |             |
|-----------|-------------|-------------|-------------|
| C6—S1—C7  | 102.78 (7)  | C12—C11—C16 | 118.58 (16) |
| C19—N1—C1 | 125.21 (13) | C12—C11—C10 | 122.22 (16) |
| C19—N1—C8 | 118.97 (13) | C16—C11—C10 | 119.19 (15) |
| C1—N1—C8  | 115.38 (11) | C8—C7—S1    | 113.06 (11) |
| C2—C1—C6  | 119.46 (13) | C8—C7—H7A   | 109         |

|             |             |               |             |
|-------------|-------------|---------------|-------------|
| C2—C1—N1    | 121.07 (13) | S1—C7—H7A     | 109         |
| C6—C1—N1    | 119.31 (13) | C8—C7—H7B     | 109         |
| C5—C6—C1    | 118.85 (14) | S1—C7—H7B     | 109         |
| C5—C6—S1    | 116.78 (12) | H7A—C7—H7B    | 107.8       |
| C1—C6—S1    | 124.37 (11) | C17—C16—C11   | 117.87 (15) |
| C10—C9—C18  | 118.24 (14) | C17—C16—C15   | 123.44 (16) |
| C10—C9—C8   | 123.02 (14) | C11—C16—C15   | 118.69 (16) |
| C18—C9—C8   | 118.60 (13) | C19—C20—H20A  | 109.5       |
| C3—C2—C1    | 120.51 (15) | C19—C20—H20B  | 109.5       |
| C3—C2—H2    | 119.7       | H20A—C20—H20B | 109.5       |
| C1—C2—H2    | 119.7       | C19—C20—H20C  | 109.5       |
| C4—C5—C6    | 120.75 (16) | H20A—C20—H20C | 109.5       |
| C4—C5—H5    | 119.6       | H20B—C20—H20C | 109.5       |
| C6—C5—H5    | 119.6       | C4—C3—C2      | 119.95 (16) |
| C17—C18—C9  | 121.18 (15) | C4—C3—H3      | 120         |
| C17—C18—H18 | 119.4       | C2—C3—H3      | 120         |
| C9—C18—H18  | 119.4       | C5—C4—C3      | 120.30 (15) |
| N1—C8—C9    | 111.35 (12) | C5—C4—H4      | 119.9       |
| N1—C8—C7    | 108.25 (12) | C3—C4—H4      | 119.9       |
| C9—C8—C7    | 116.93 (13) | C14—C15—C16   | 120.74 (19) |
| N1—C8—H8    | 106.6       | C14—C15—H15   | 119.6       |

|             |             |             |             |
|-------------|-------------|-------------|-------------|
| C9—C8—H8    | 106.6       | C16—C15—H15 | 119.6       |
| C7—C8—H8    | 106.6       | C13—C12—C11 | 121.1 (2)   |
| C9—C10—C11  | 121.97 (15) | C13—C12—H12 | 119.5       |
| C9—C10—H10  | 119         | C11—C12—H12 | 119.5       |
| C11—C10—H10 | 119         | C15—C14—C13 | 120.42 (19) |
| C18—C17—C16 | 121.53 (15) | C15—C14—H14 | 119.8       |
| C18—C17—H17 | 119.2       | C13—C14—H14 | 119.8       |
| C16—C17—H17 | 119.2       | C12—C13—C14 | 120.5 (2)   |
| O1—C19—N1   | 120.10 (16) | C12—C13—H13 | 119.8       |
| O1—C19—C20  | 120.55 (15) | C14—C13—H13 | 119.8       |
| N1—C19—C20  | 119.33 (15) |             |             |

**Table 17.** Anisotropic displacement parameters ( $\text{\AA}^2 \times 10^3$ ) for **2g**. The anisotropic displacement factor exponent takes the form:  $-2p^2[ h^2 a^* 2U^{11} + \dots + 2 h k a^* b^* U^{12} ]$

|       | U <sup>11</sup> | U <sup>22</sup> | U <sup>33</sup> | U <sup>23</sup> | U <sup>13</sup> | U <sup>12</sup> |
|-------|-----------------|-----------------|-----------------|-----------------|-----------------|-----------------|
| S(1)  | 55(1)           | 55(1)           | 51(1)           | -6(1)           | 10(1)           | -3(1)           |
| N(1)  | 42(1)           | 49(1)           | 44(1)           | 9(1)            | 12(1)           | 5(1)            |
| O(1)  | 82(1)           | 95(1)           | 75(1)           | 42(1)           | 5(1)            | 14(1)           |
| C(1)  | 38(1)           | 43(1)           | 42(1)           | 4(1)            | 17(1)           | 8(1)            |
| C(6)  | 42(1)           | 43(1)           | 43(1)           | 0(1)            | 17(1)           | 10(1)           |
| C(9)  | 49(1)           | 47(1)           | 40(1)           | 4(1)            | 20(1)           | -5(1)           |
| C(2)  | 42(1)           | 51(1)           | 56(1)           | -1(1)           | 20(1)           | 2(1)            |
| C(5)  | 59(1)           | 57(1)           | 43(1)           | 6(1)            | 20(1)           | 18(1)           |
| C(18) | 48(1)           | 61(1)           | 39(1)           | 1(1)            | 13(1)           | -8(1)           |
| C(8)  | 50(1)           | 47(1)           | 46(1)           | 9(1)            | 17(1)           | -1(1)           |



|       |       |        |       |        |       |        |
|-------|-------|--------|-------|--------|-------|--------|
| C(10) | 48(1) | 56(1)  | 58(1) | -12(1) | 20(1) | -10(1) |
| C(17) | 66(1) | 53(1)  | 43(1) | -6(1)  | 18(1) | -13(1) |
| C(19) | 55(1) | 50(1)  | 46(1) | 3(1)   | 1(1)  | 9(1)   |
| C(11) | 51(1) | 59(1)  | 51(1) | -2(1)  | 24(1) | -4(1)  |
| C(7)  | 57(1) | 43(1)  | 64(1) | 0(1)   | 24(1) | -2(1)  |
| C(16) | 65(1) | 49(1)  | 44(1) | 6(1)   | 26(1) | -2(1)  |
| C(20) | 43(1) | 65(1)  | 67(1) | -13(1) | 2(1)  | 15(1)  |
| C(3)  | 60(1) | 48(1)  | 76(1) | 5(1)   | 39(1) | 1(1)   |
| C(4)  | 77(1) | 53(1)  | 64(1) | 19(1)  | 40(1) | 17(1)  |
| C(15) | 90(1) | 55(1)  | 65(1) | -1(1)  | 38(1) | 4(1)   |
| C(12) | 52(1) | 94(2)  | 88(1) | -21(1) | 25(1) | 1(1)   |
| C(14) | 92(2) | 76(1)  | 83(1) | 6(1)   | 45(1) | 26(1)  |
| C(13) | 64(1) | 108(2) | 87(2) | -5(1)  | 32(1) | 19(1)  |

**Table 18. Hydrogen coordinates (  $\times 10^4$ ) and isotropic displacement parameters ( $\text{\AA}^2 \times 10^3$ ) for 2g**

|        | x     | y     | z    | U(eq) |
|--------|-------|-------|------|-------|
| H(2)   | 9437  | 4075  | 6092 | 58    |
| H(5)   | 7316  | 3124  | 3508 | 63    |
| H(18)  | 8285  | 3315  | 7183 | 60    |
| H(8)   | 7904  | -1060 | 6747 | 57    |
| H(10)  | 6075  | 816   | 5697 | 64    |
| H(17)  | 7567  | 6054  | 7573 | 65    |
| H(7A)  | 6759  | -2114 | 5557 | 64    |
| H(7B)  | 7652  | -2901 | 5503 | 64    |
| H(20A) | 10463 | 974   | 6669 | 93    |
| H(20B) | 9957  | 241   | 5737 | 93    |
| H(20C) | 10436 | -1473 | 6420 | 93    |
| H(3)   | 9317  | 6448  | 4983 | 69    |

|       |      |      |      |     |
|-------|------|------|------|-----|
| H(4)  | 8273 | 5927 | 3686 | 73  |
| H(15) | 6171 | 7951 | 7459 | 80  |
| H(12) | 4701 | 2696 | 5574 | 93  |
| H(14) | 4714 | 8137 | 6865 | 95  |
| H(13) | 3981 | 5500 | 5926 | 101 |

---
